# Supplementary material for: New tricks of well-known aminoazoles in isocyanide-based multicomponent reactions and antibacterial activity of the compounds synthesized
Source: PubMed Central journal article supplement (PMC5480327; doi:10.3762/bjoc.13.104), 2017-05-31

**Supporting Information File 2**  
**for**  
**New tricks of well-known aminoazoles in isocyanide-based**  
**multicomponent reactions and antibacterial activity of**  
**the compounds synthesized**

Maryna V. Murlykina<sup>1,2</sup>, Maryna N. Kornet<sup>3</sup>, Sergey M. Desenko<sup>1,4</sup>,  
Svetlana V. Shishkina<sup>1,4</sup>, Oleg V. Shishkin<sup>1</sup>, Aleksander A. Brazhko<sup>3</sup>,  
Vladimir I. Musatov<sup>1</sup>, Erik V. Van der Eycken<sup>2</sup> and Valentin A. Chebanov<sup>\*,1,2,4</sup>

Address: <sup>a</sup>Division of Chemistry of Functional Materials, State Scientific Institution “Institute for Single Crystals” of National Academy of Sciences of Ukraine, Nauky Ave., 60, 61001, Kharkiv, Ukraine, <sup>b</sup>Laboratory for Organic & Microwave-Assisted Chemistry (LOMAC), KU Leuven, Celestijnenlaan 200F, B-3001, Leuven, Belgium, <sup>c</sup>Laboratory of Biotechnology of Physiologically Active Substances, Zaporizhzhya National University, Zhukovsky str., 66, Zaporizhzhya, Ukraine, 69600 and <sup>d</sup>Faculty of Chemistry, V. N. Karazin Kharkiv National University, Svobody sq., 4, 61077, Kharkiv, Ukraine

Email: Valentin A. Chebanov - [chebanov@isc.kharkov.com](mailto:chebanov@isc.kharkov.com)

\*Corresponding author

**NMR spectra**

# <sup>1</sup>H and <sup>13</sup>C NMR spectra for compounds synthesized

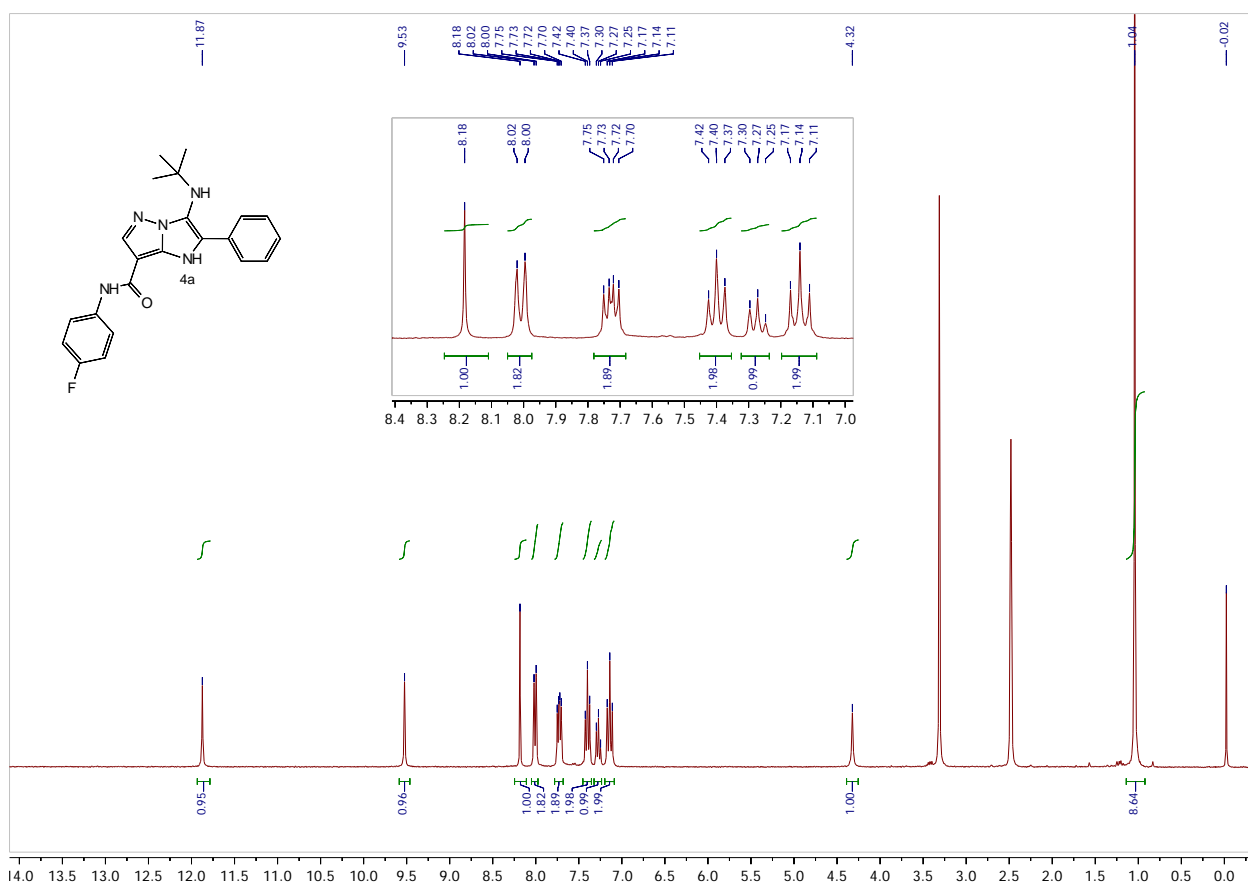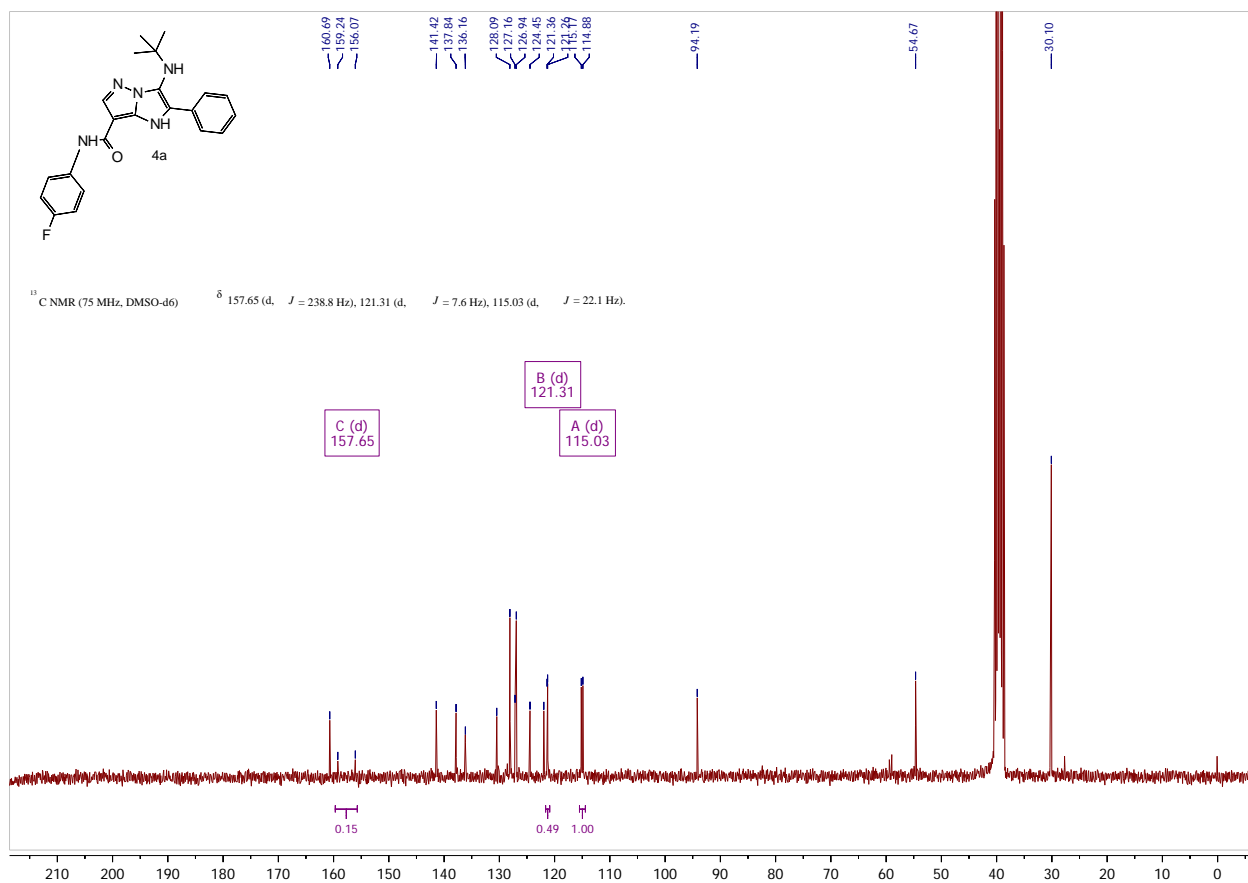

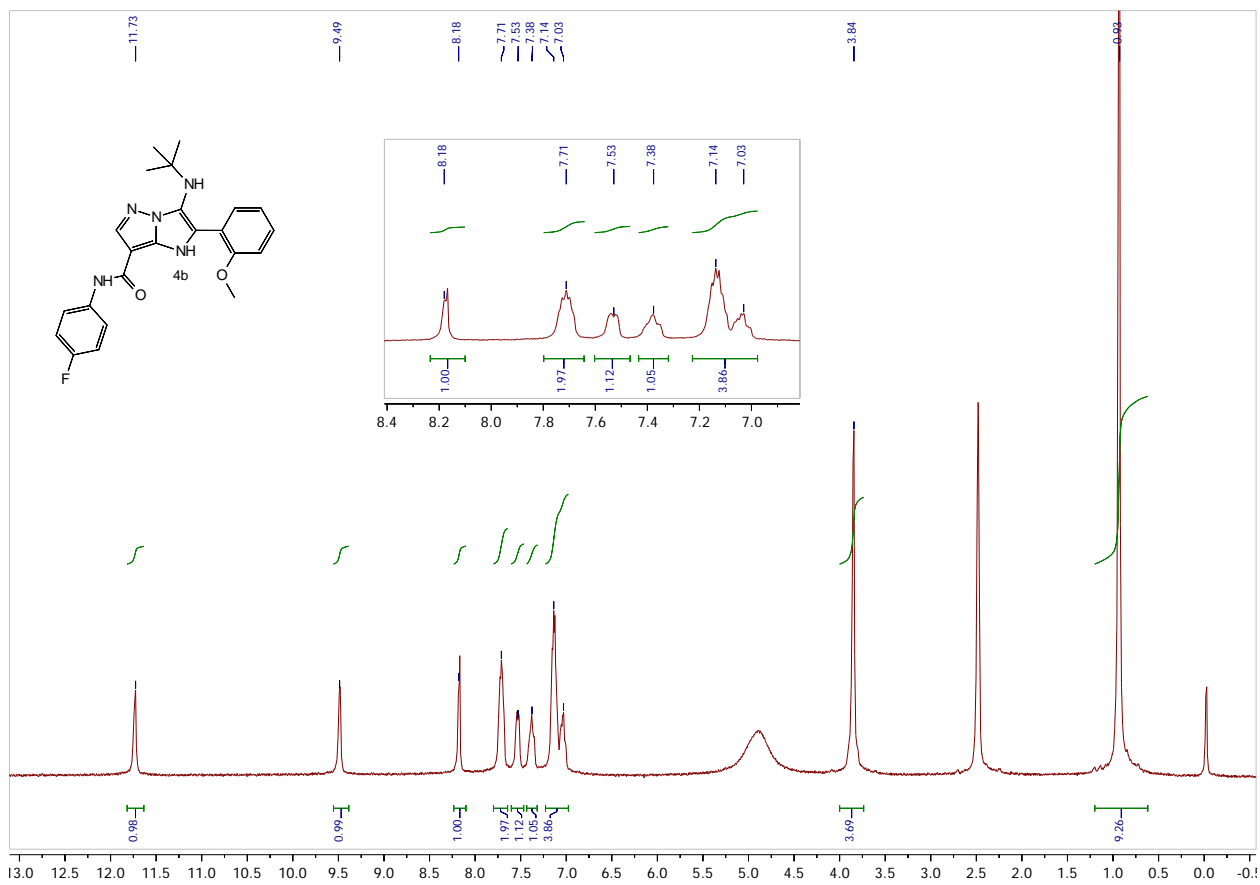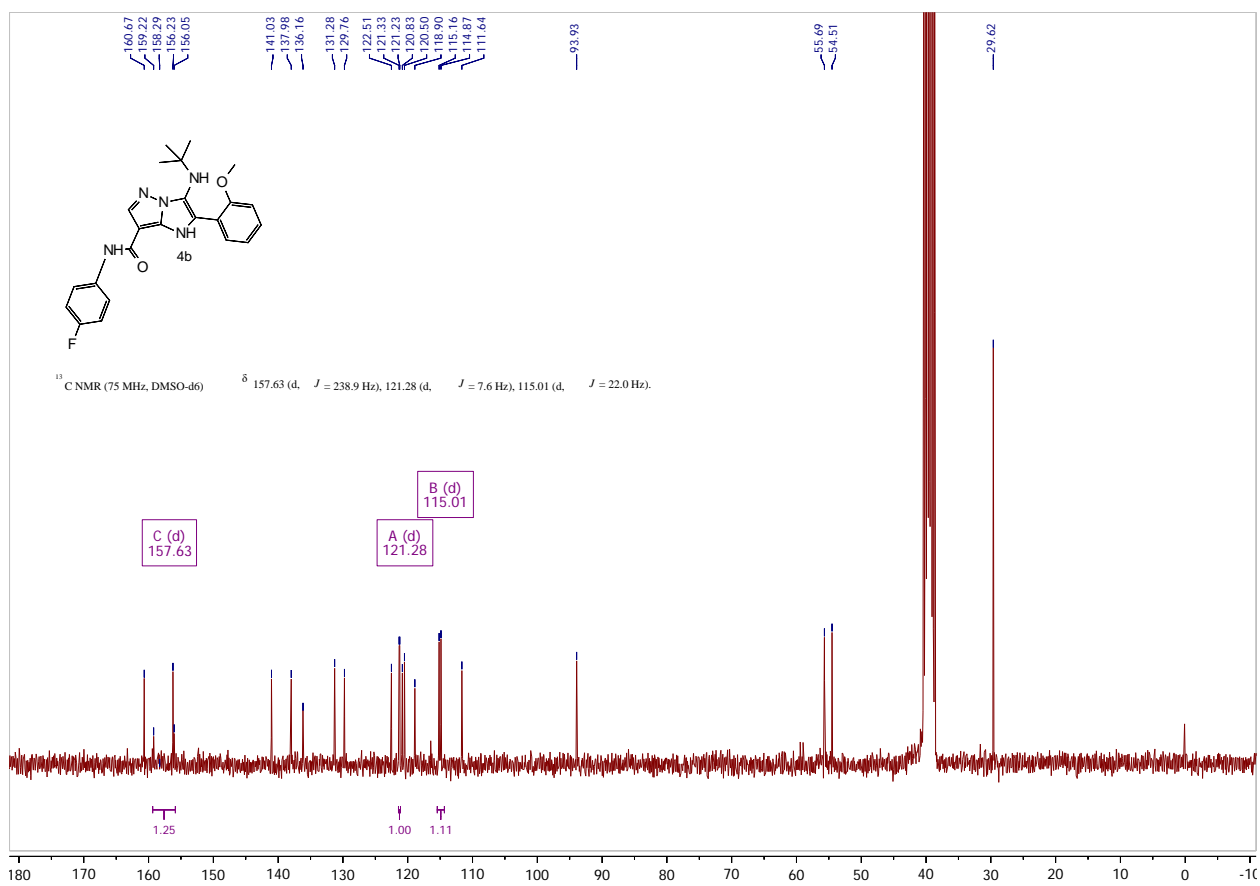

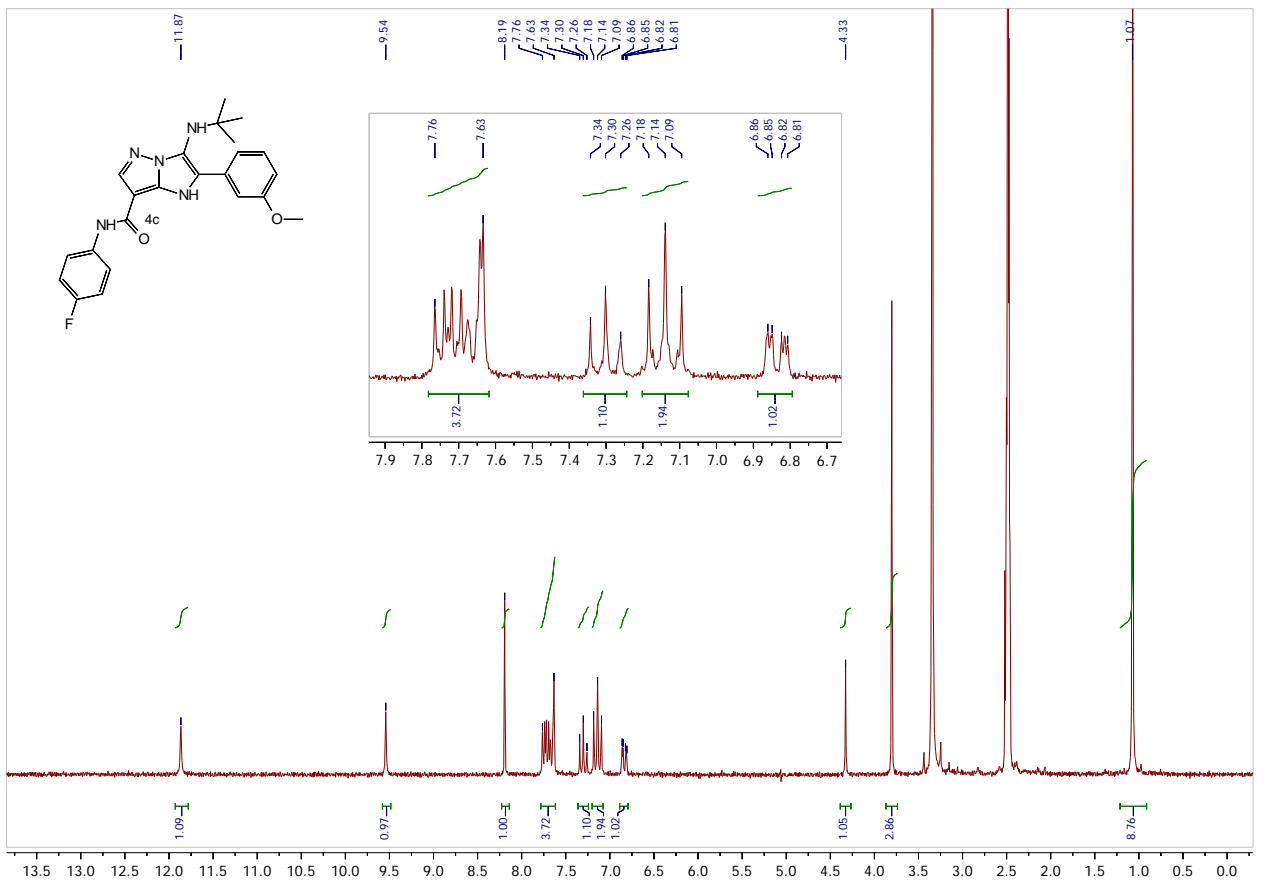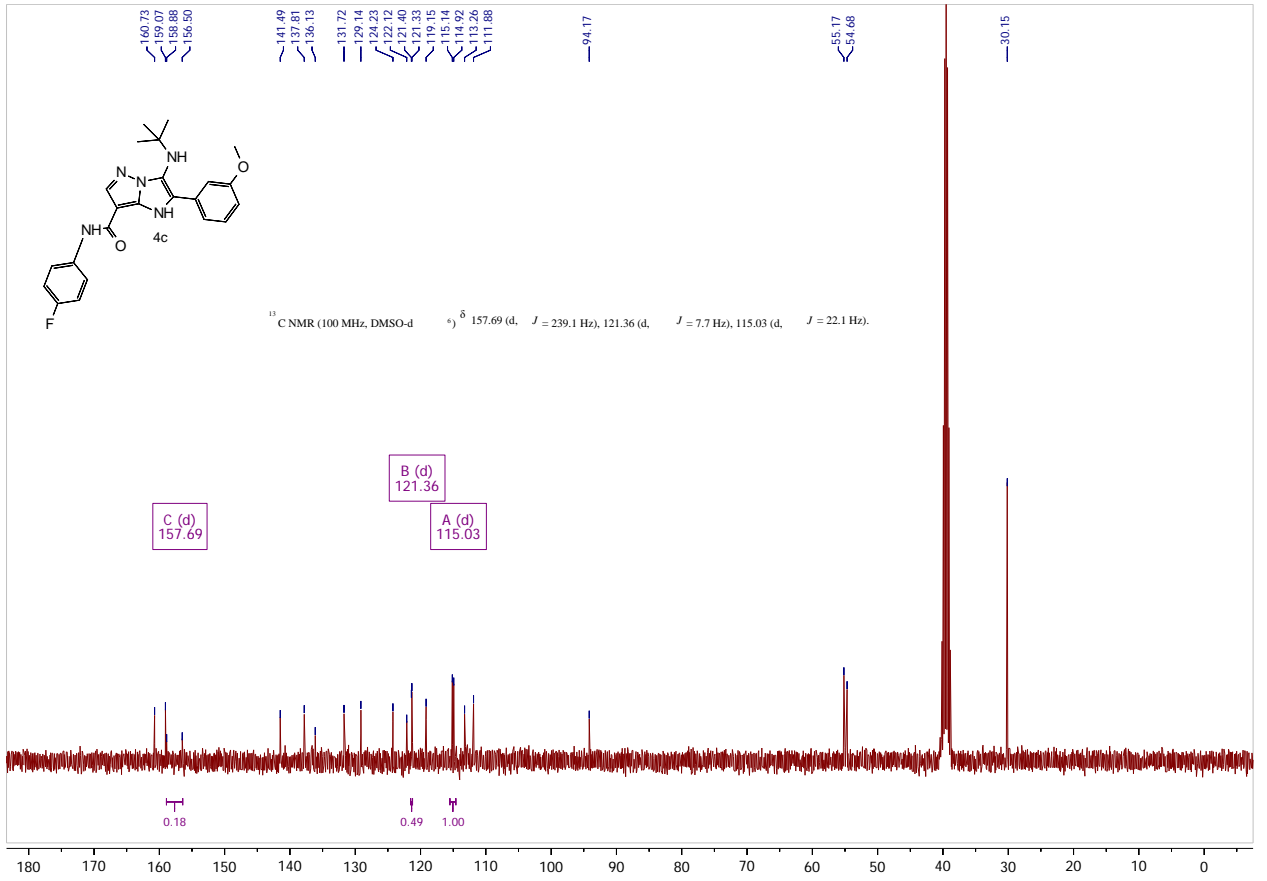

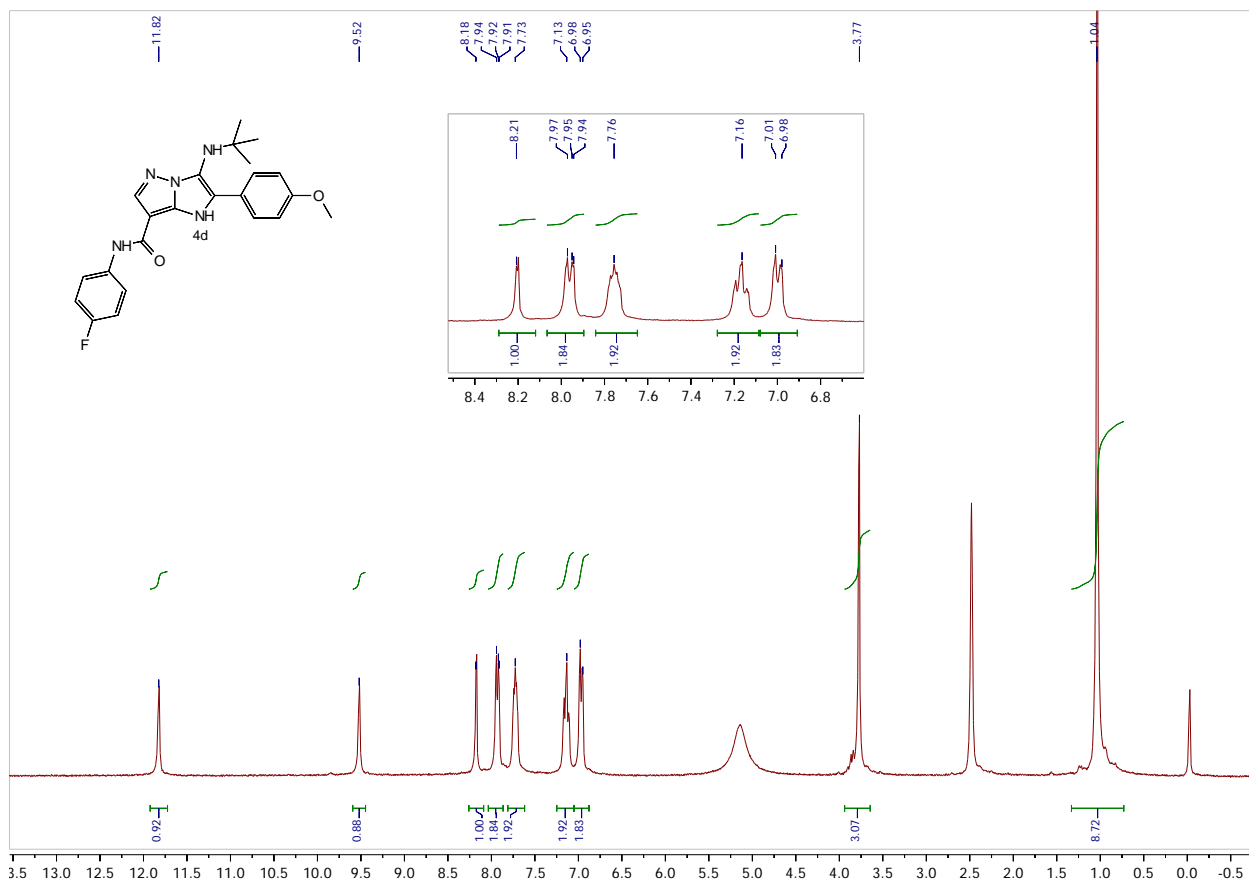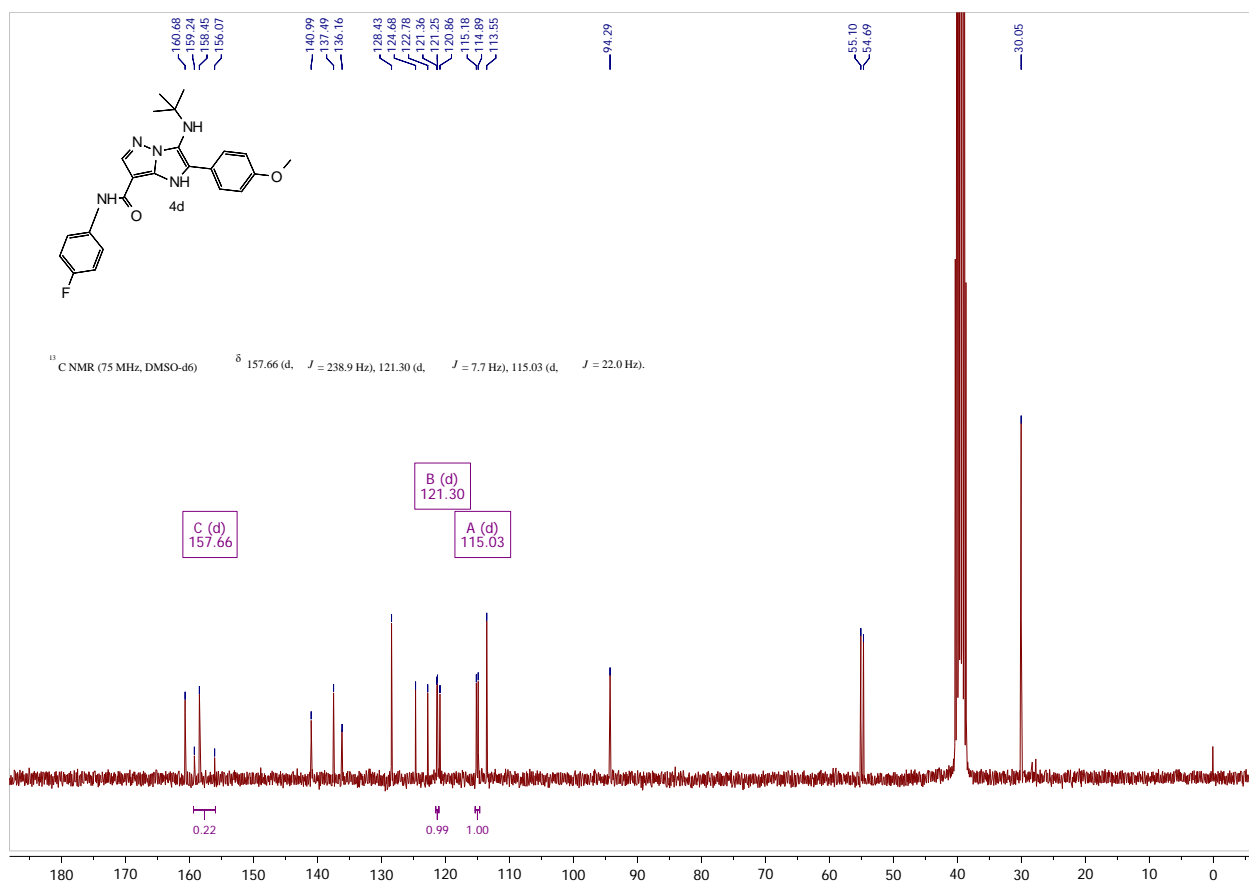

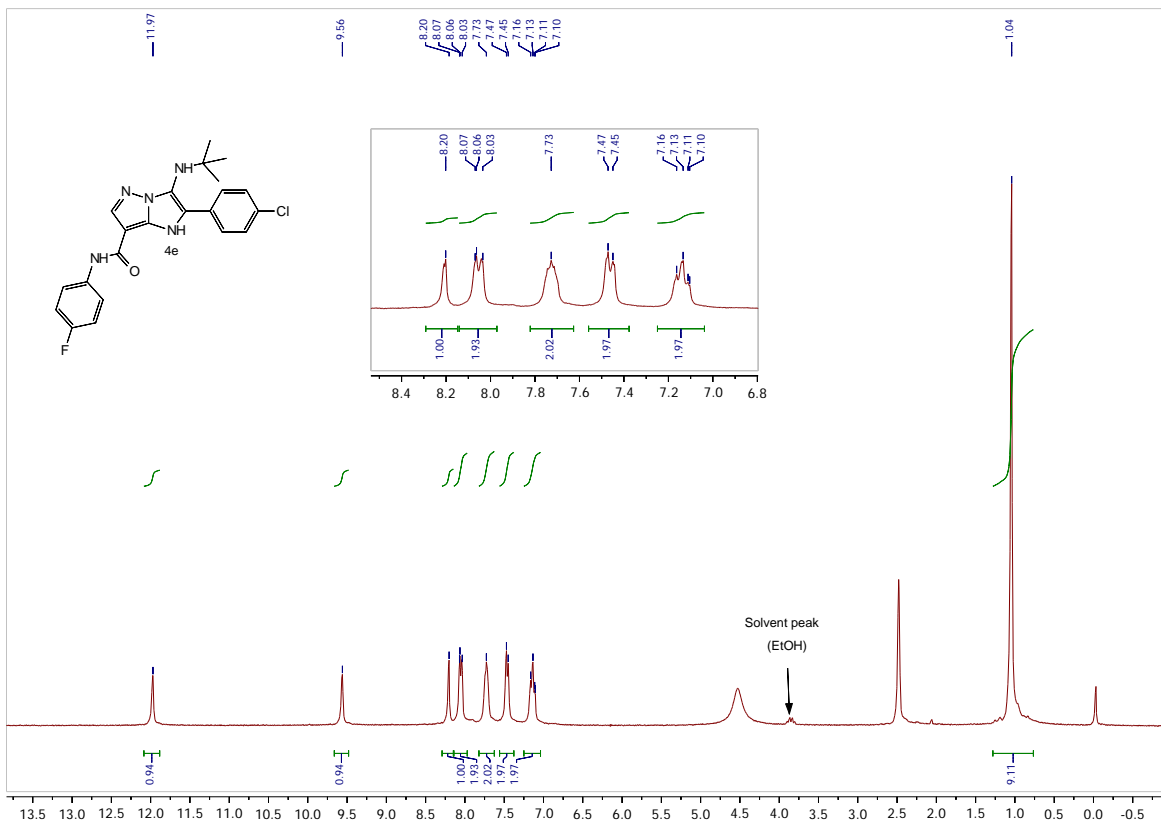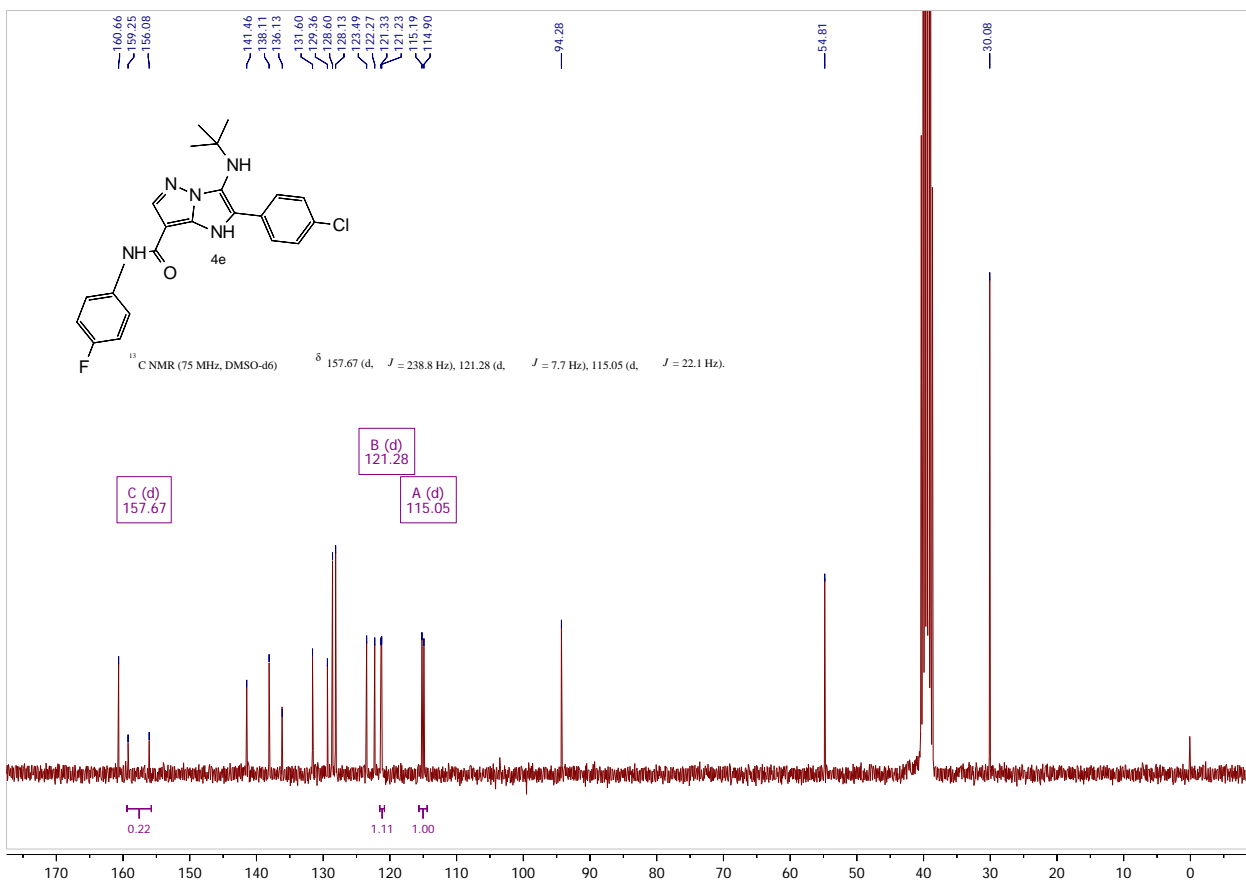

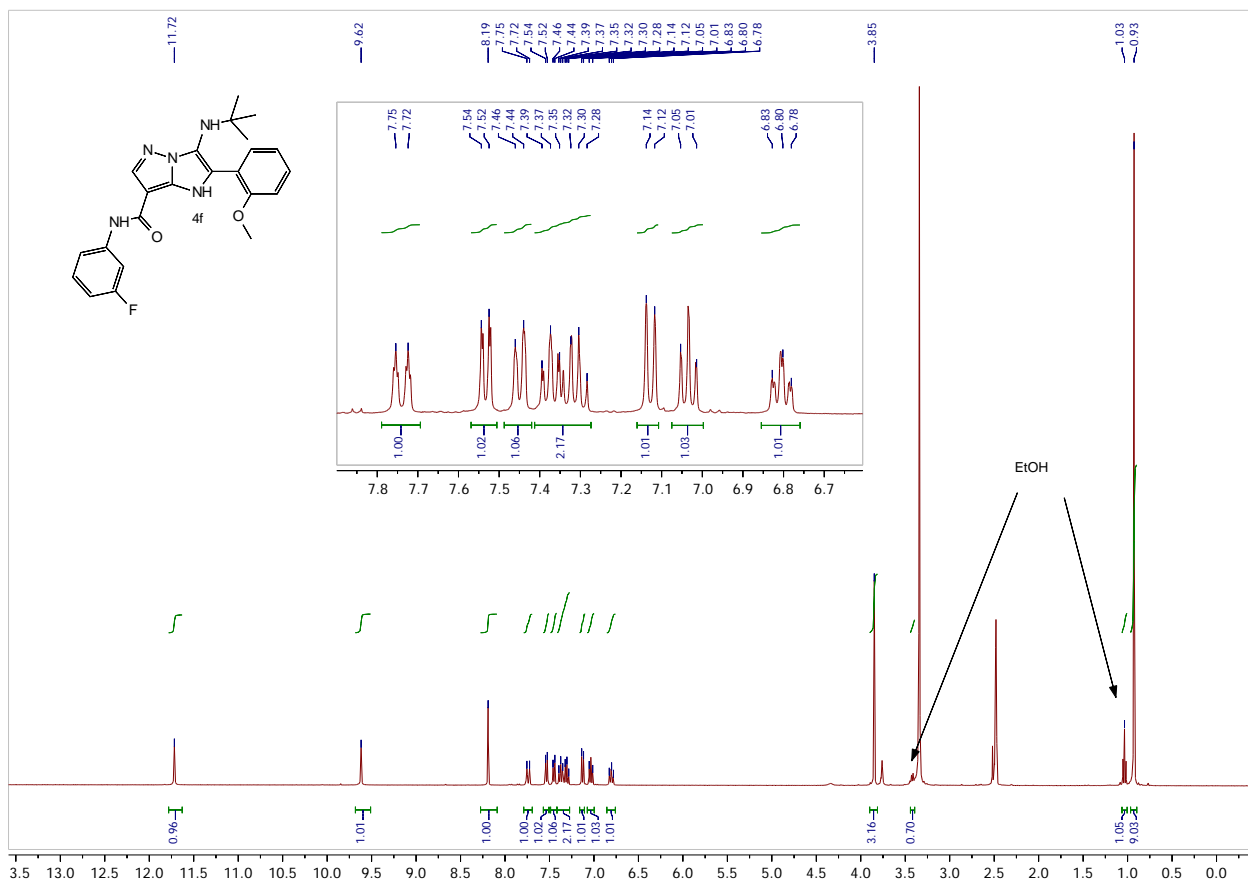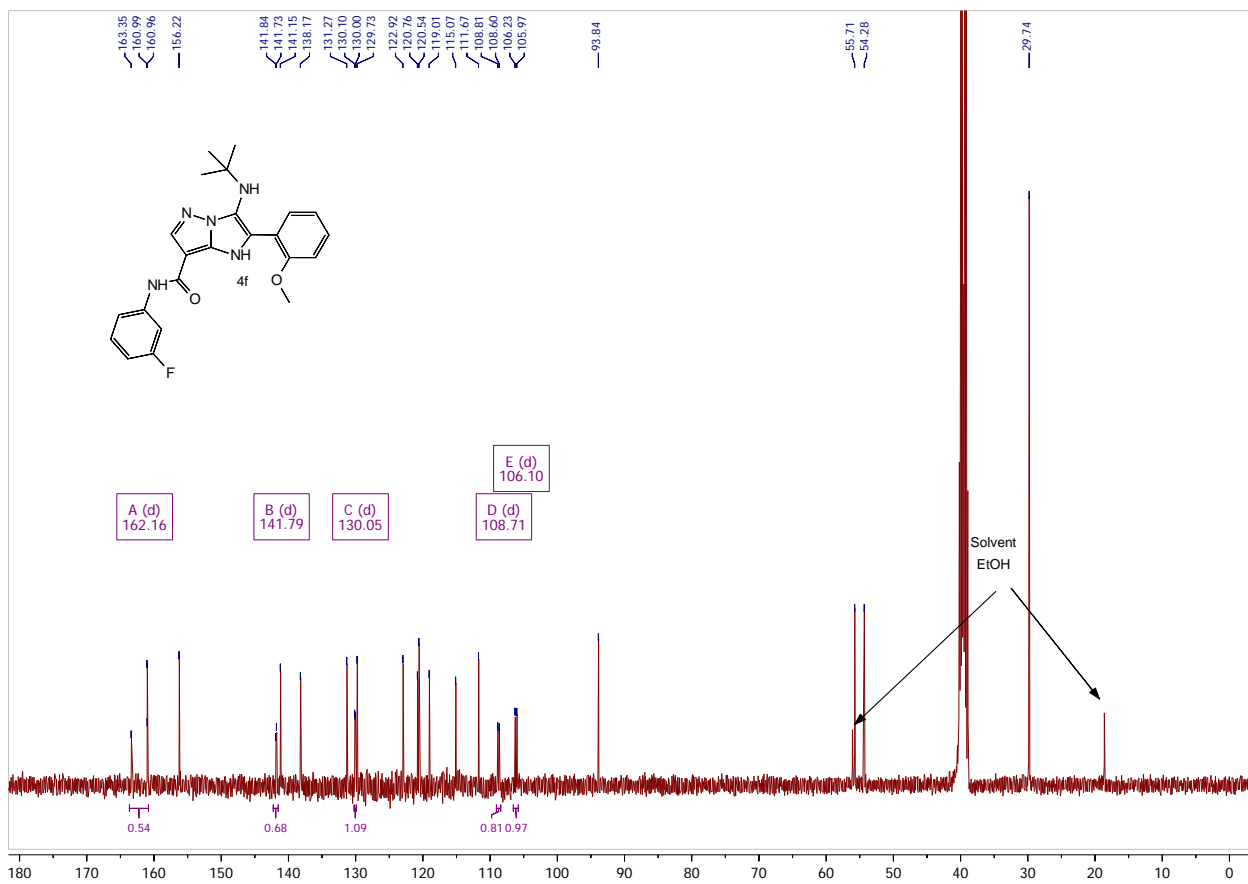

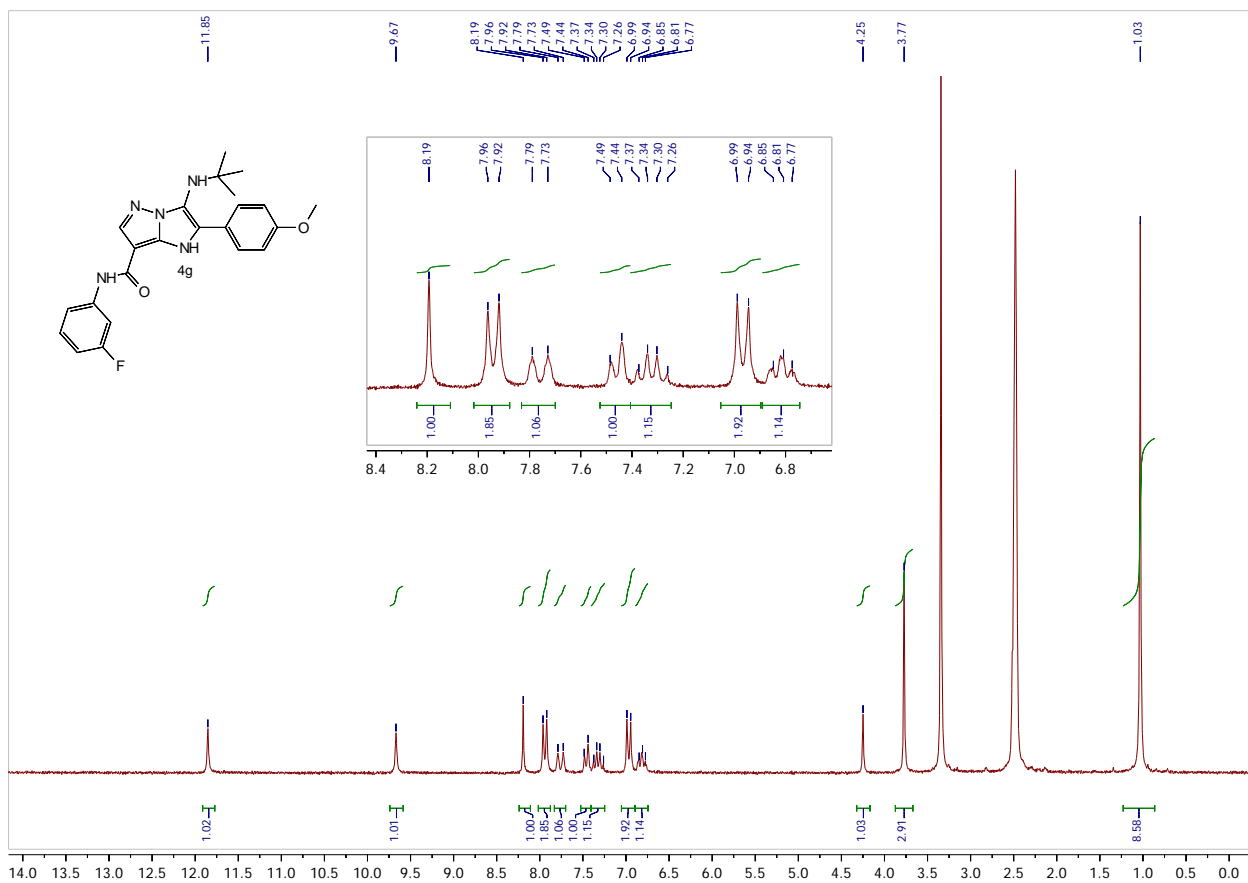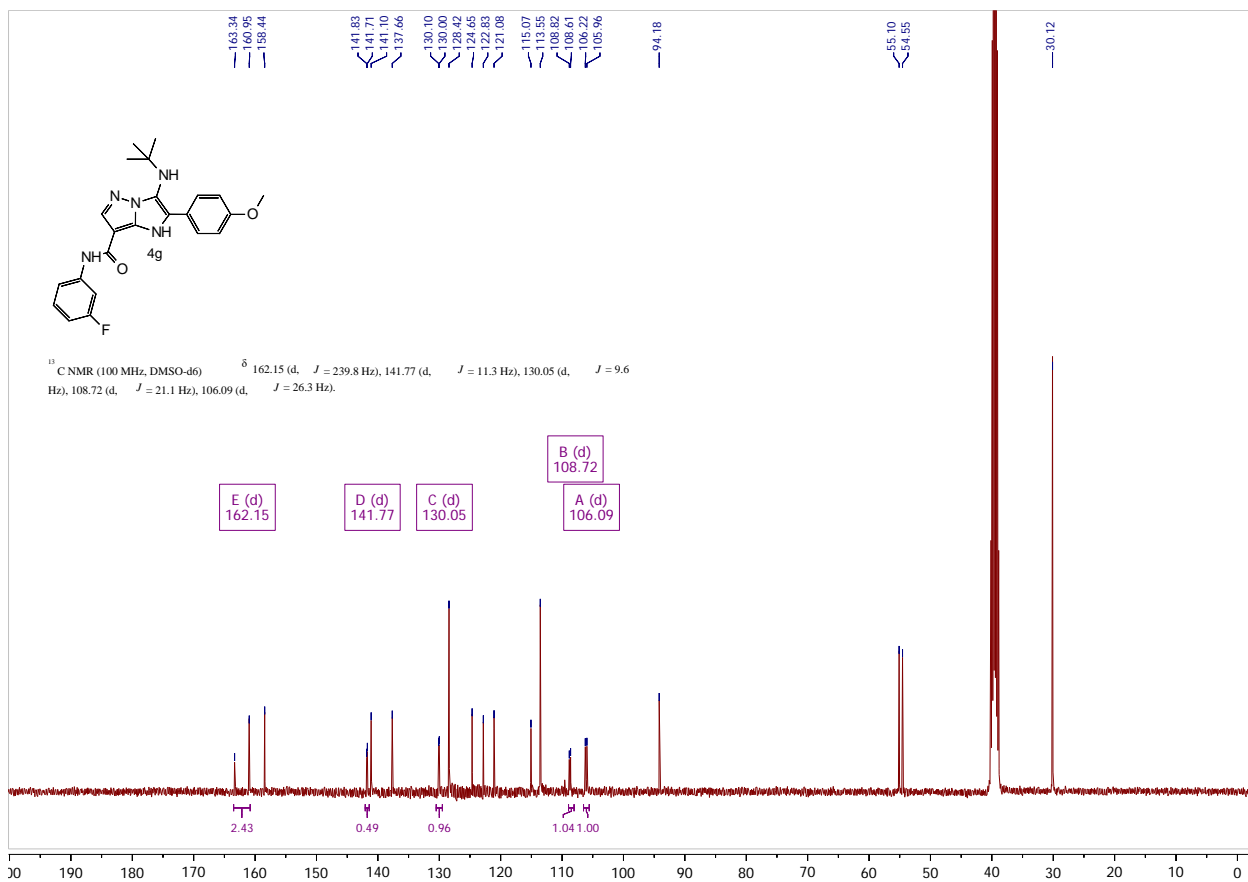



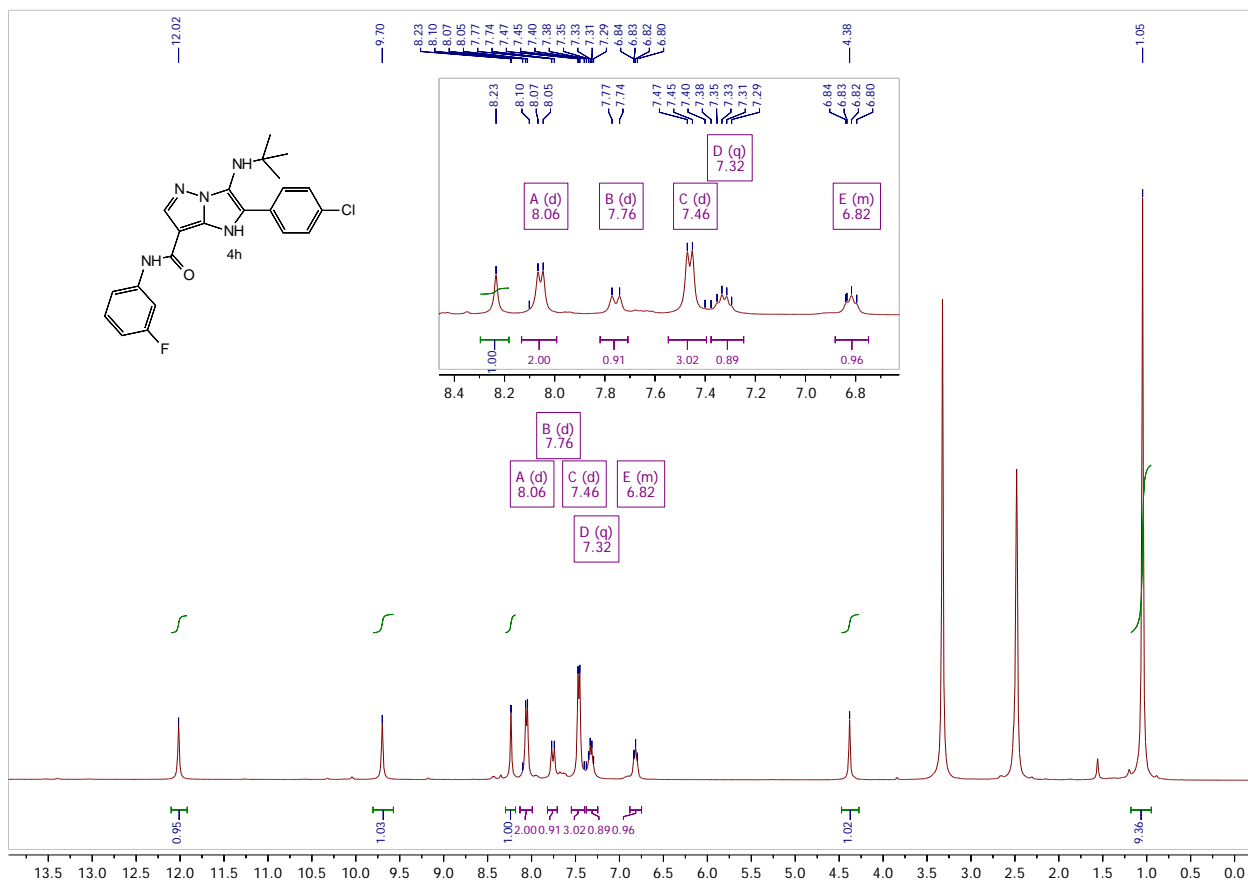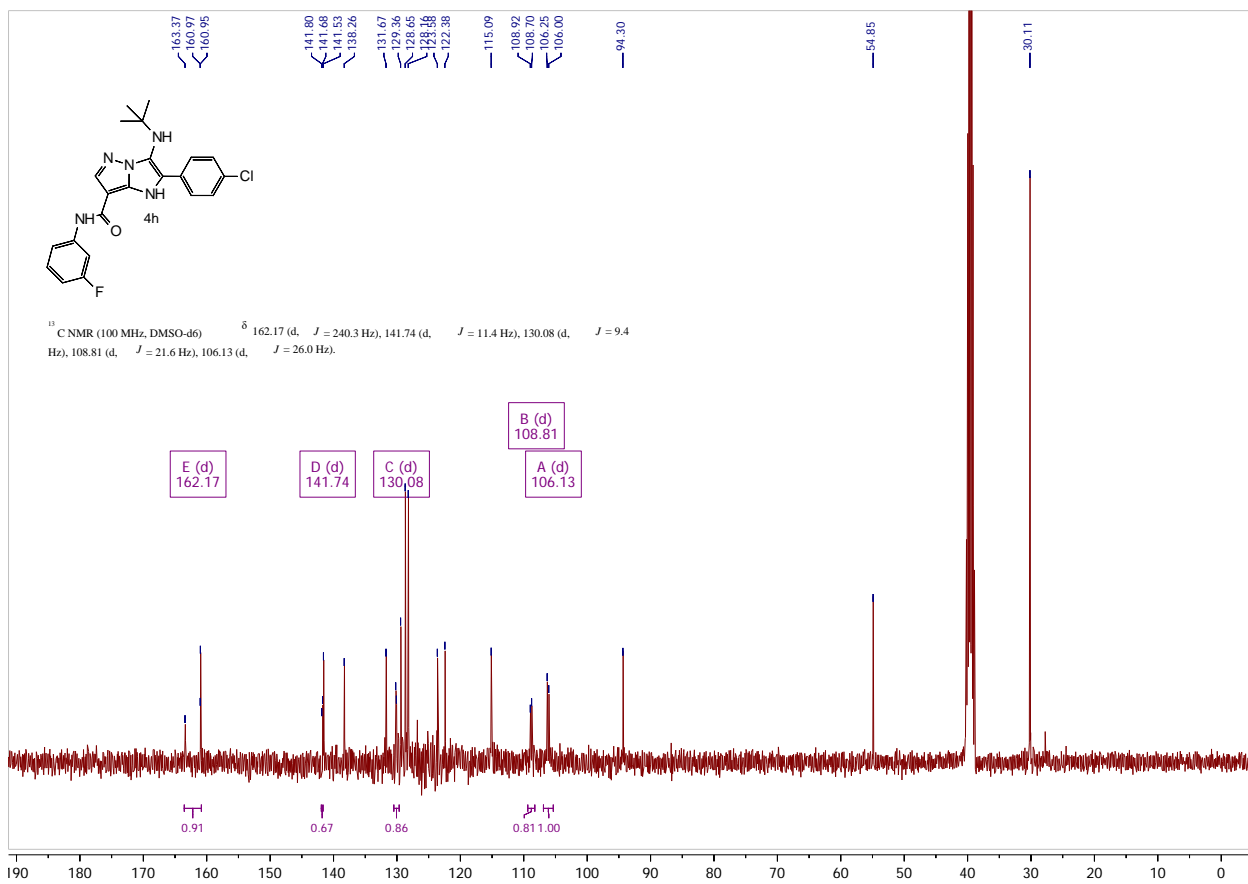

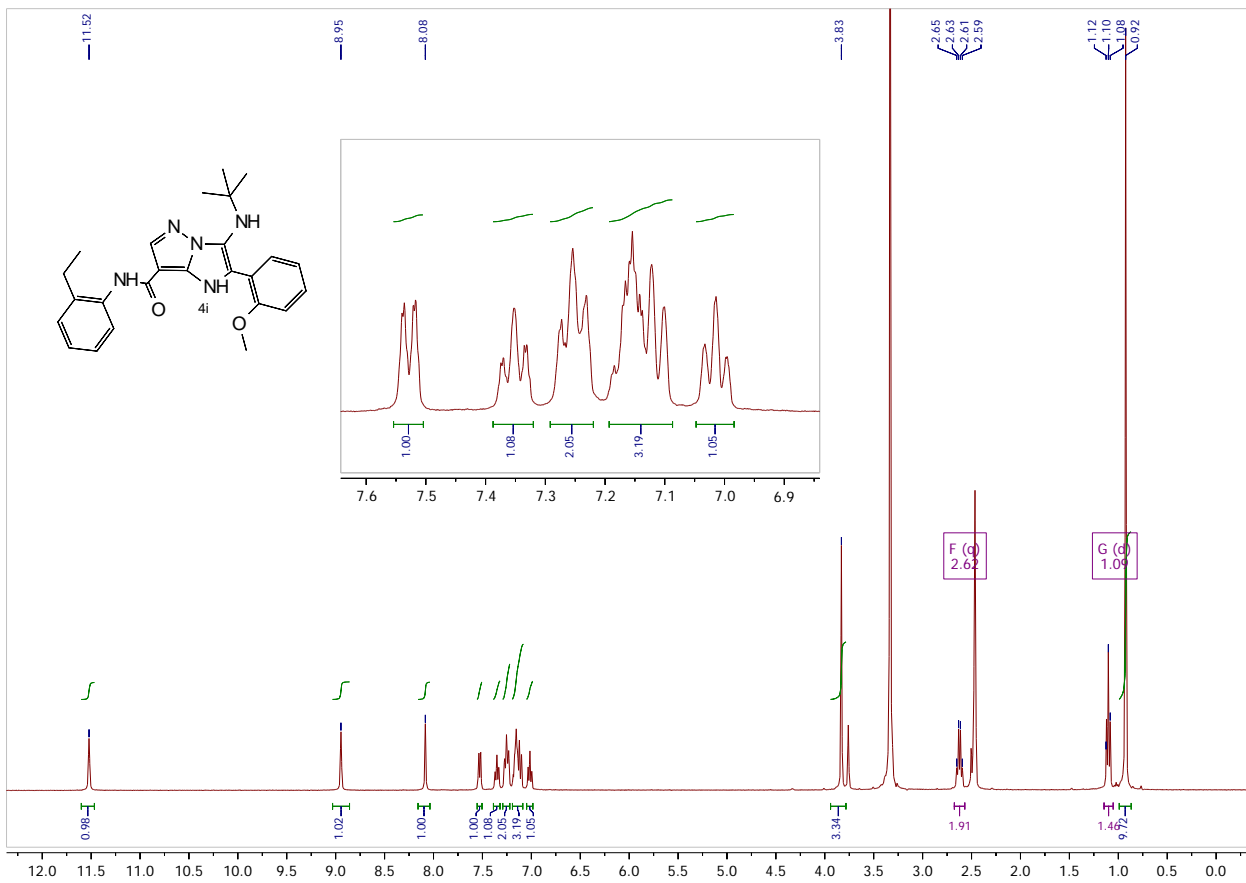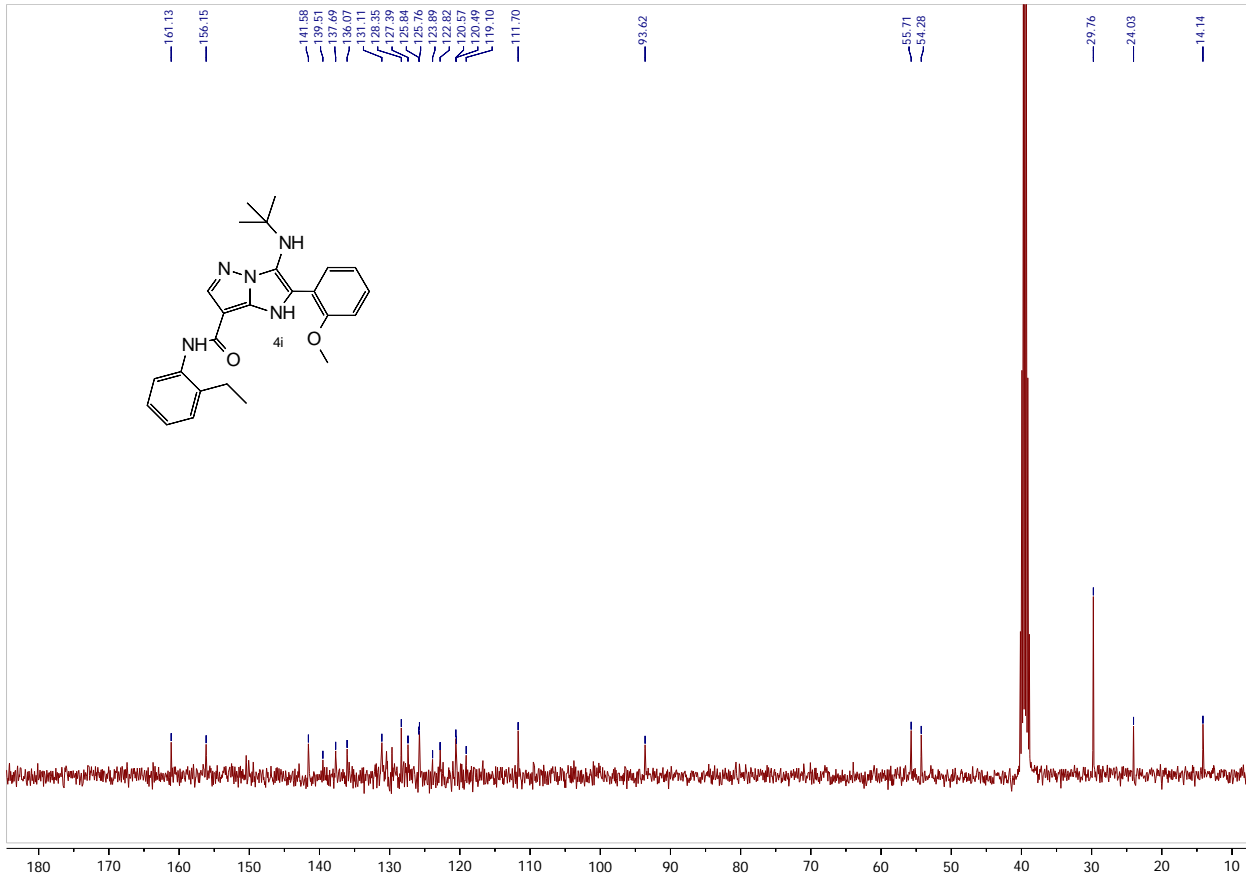

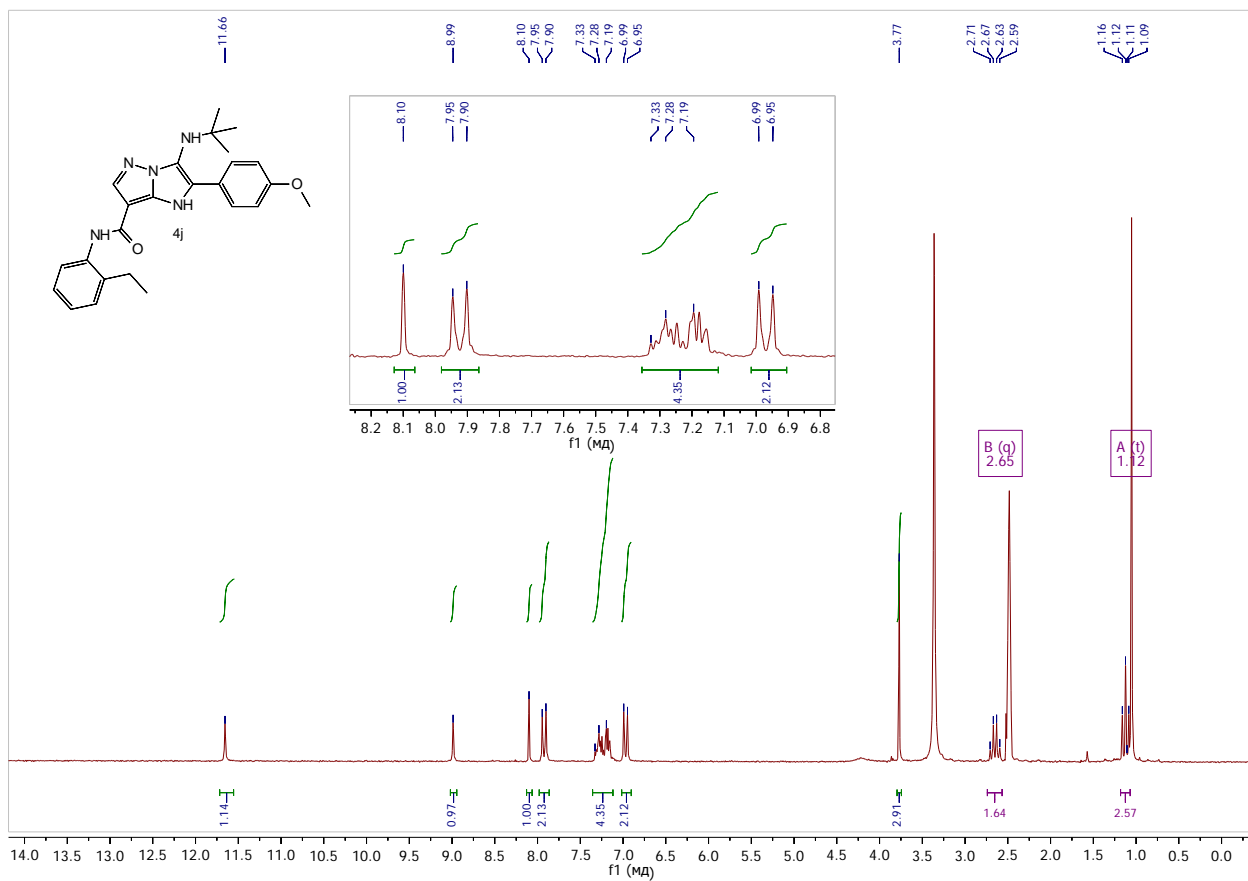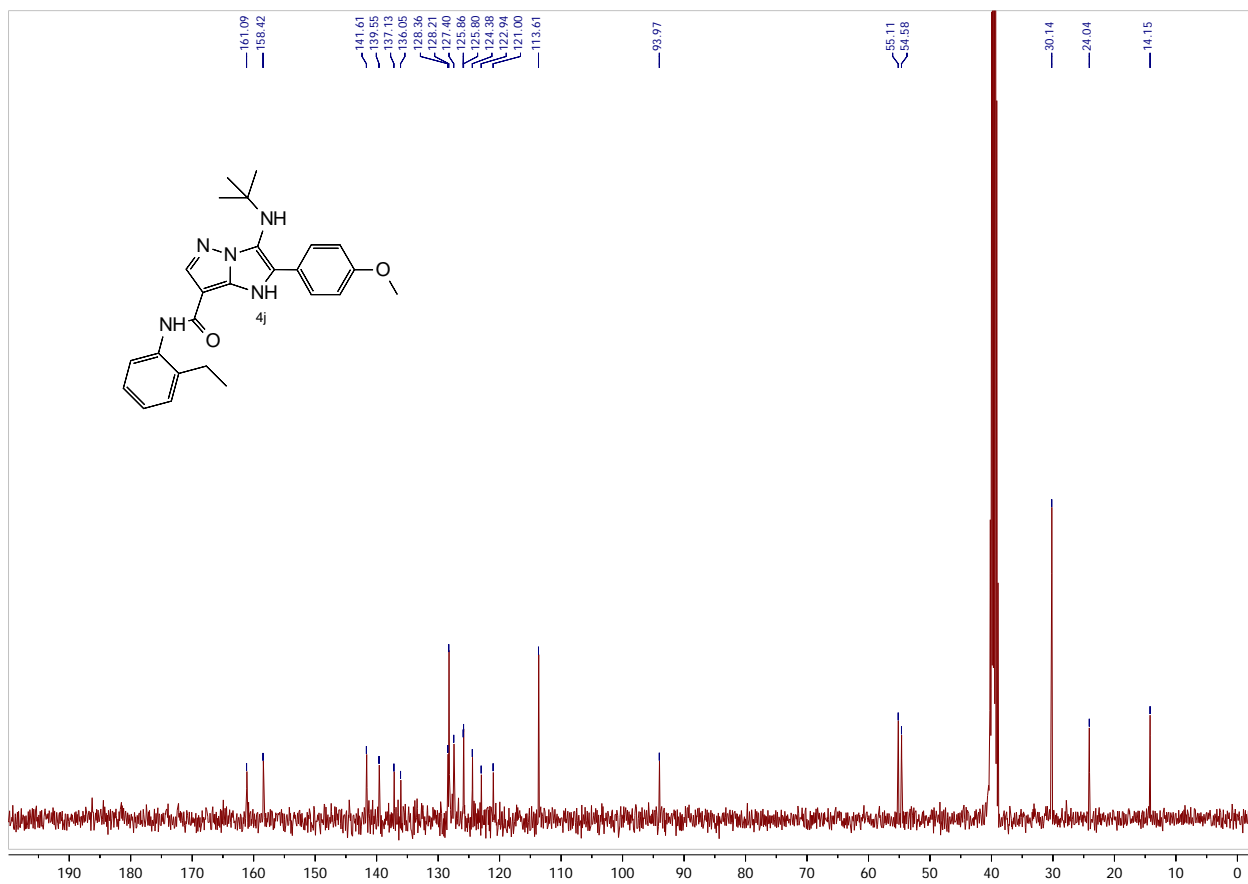

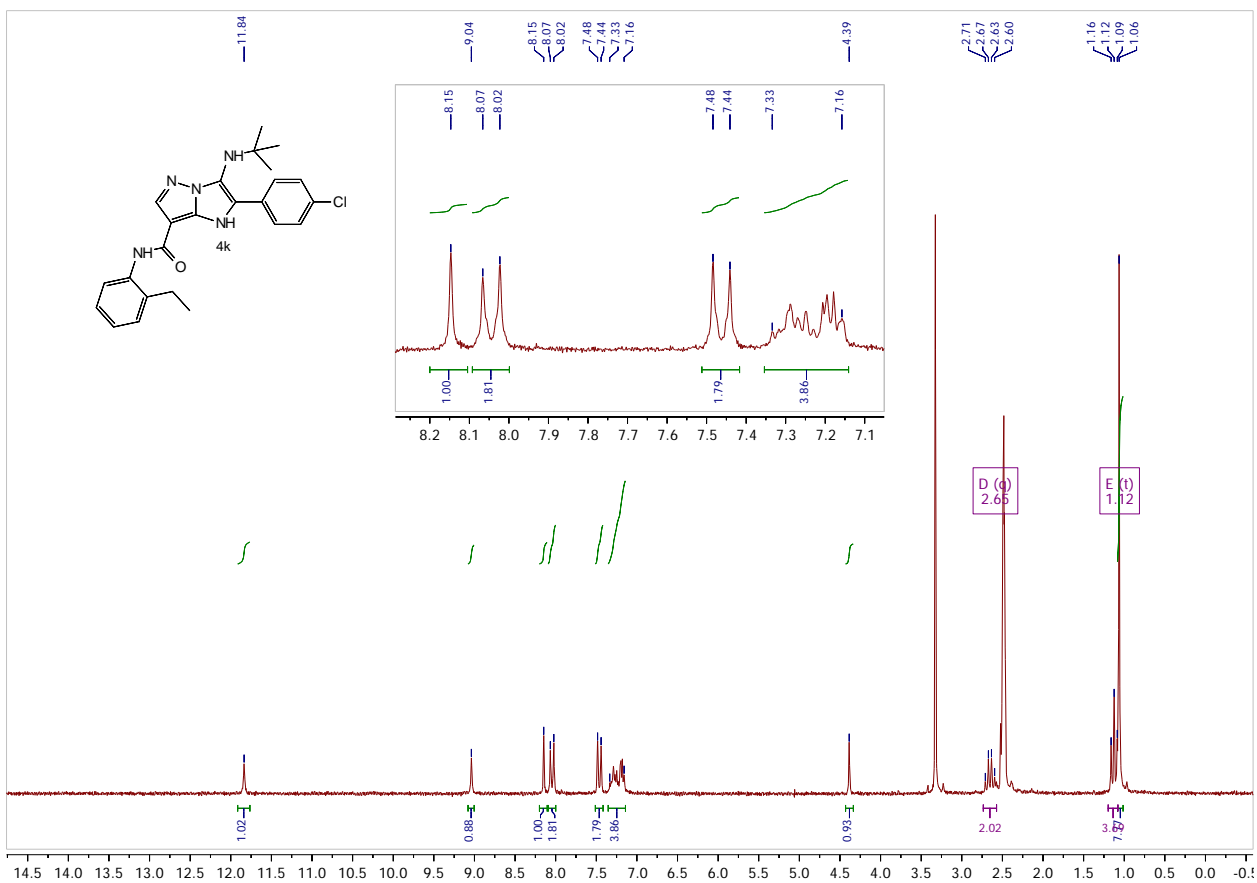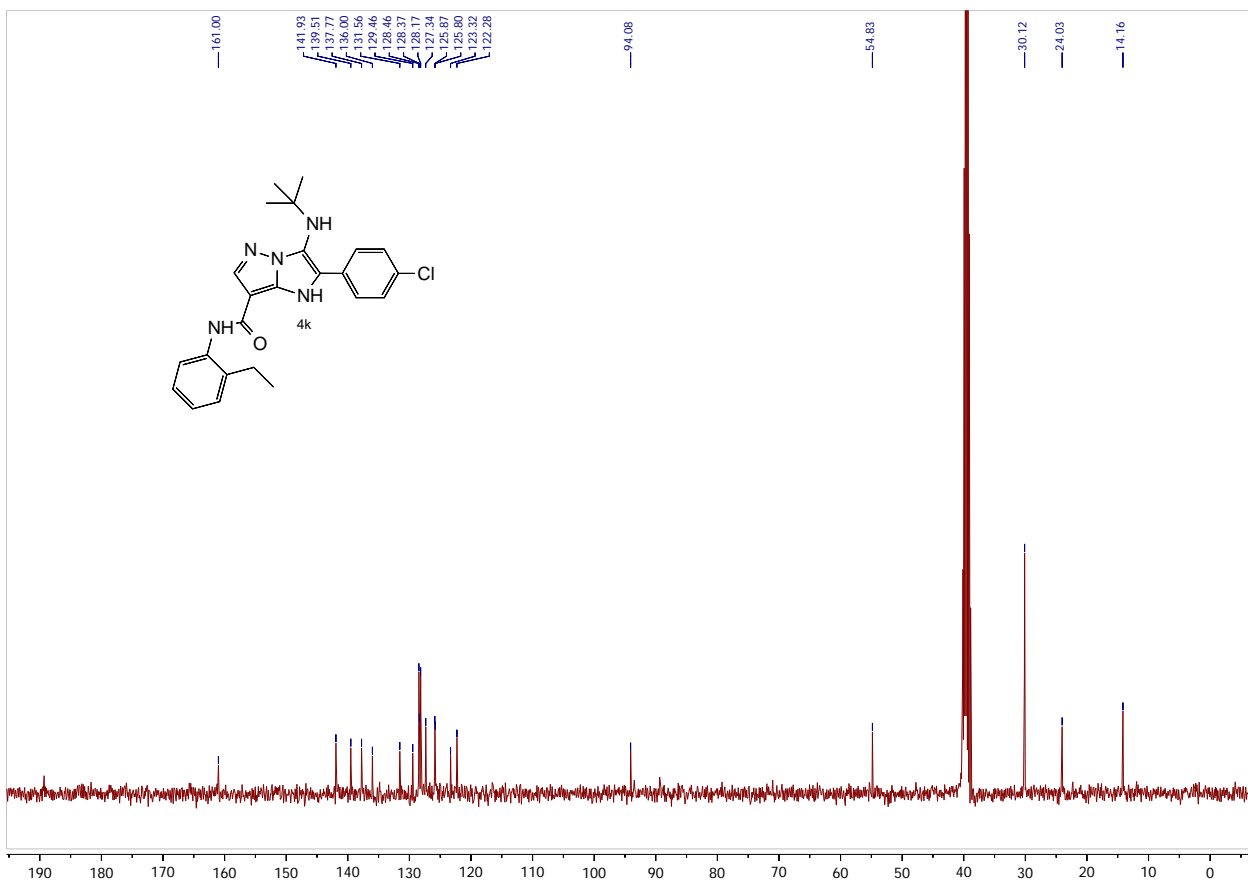

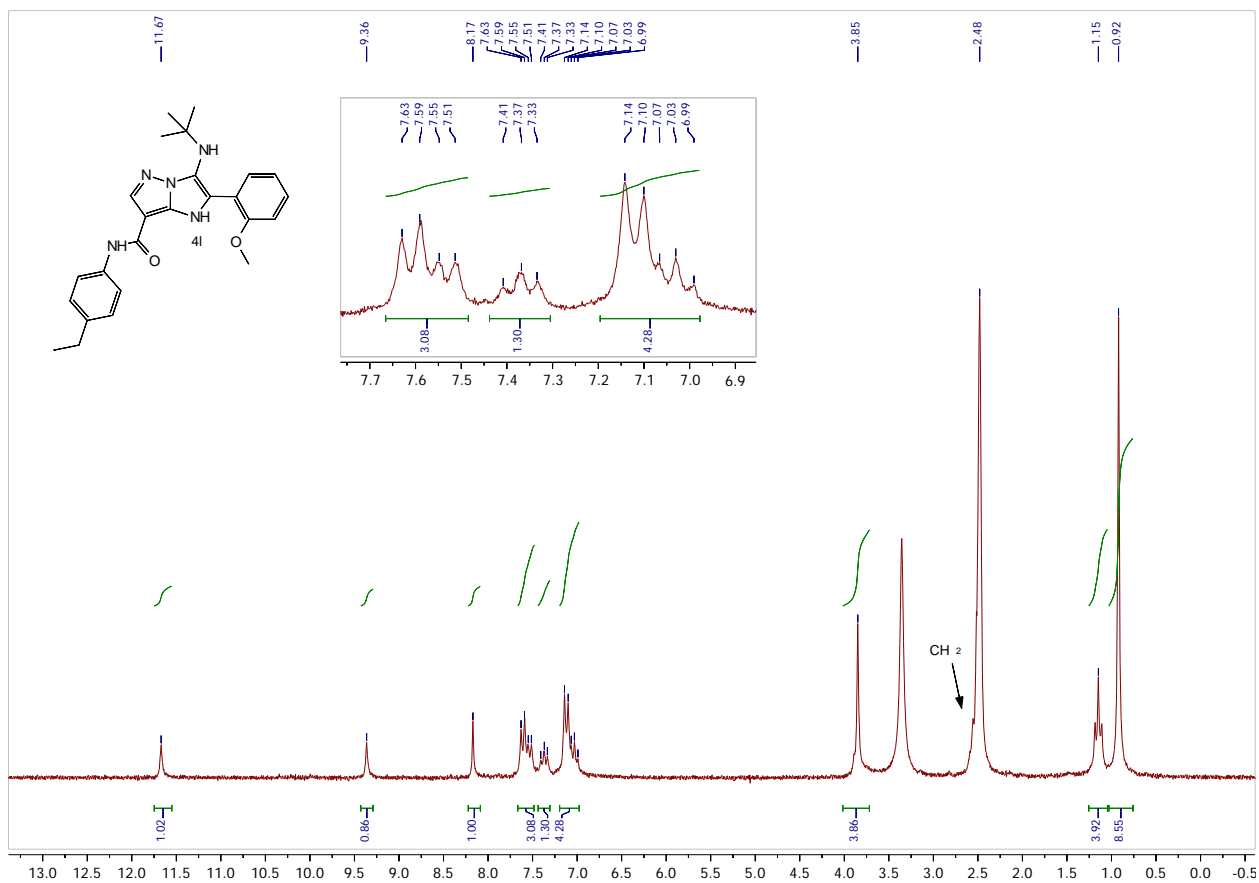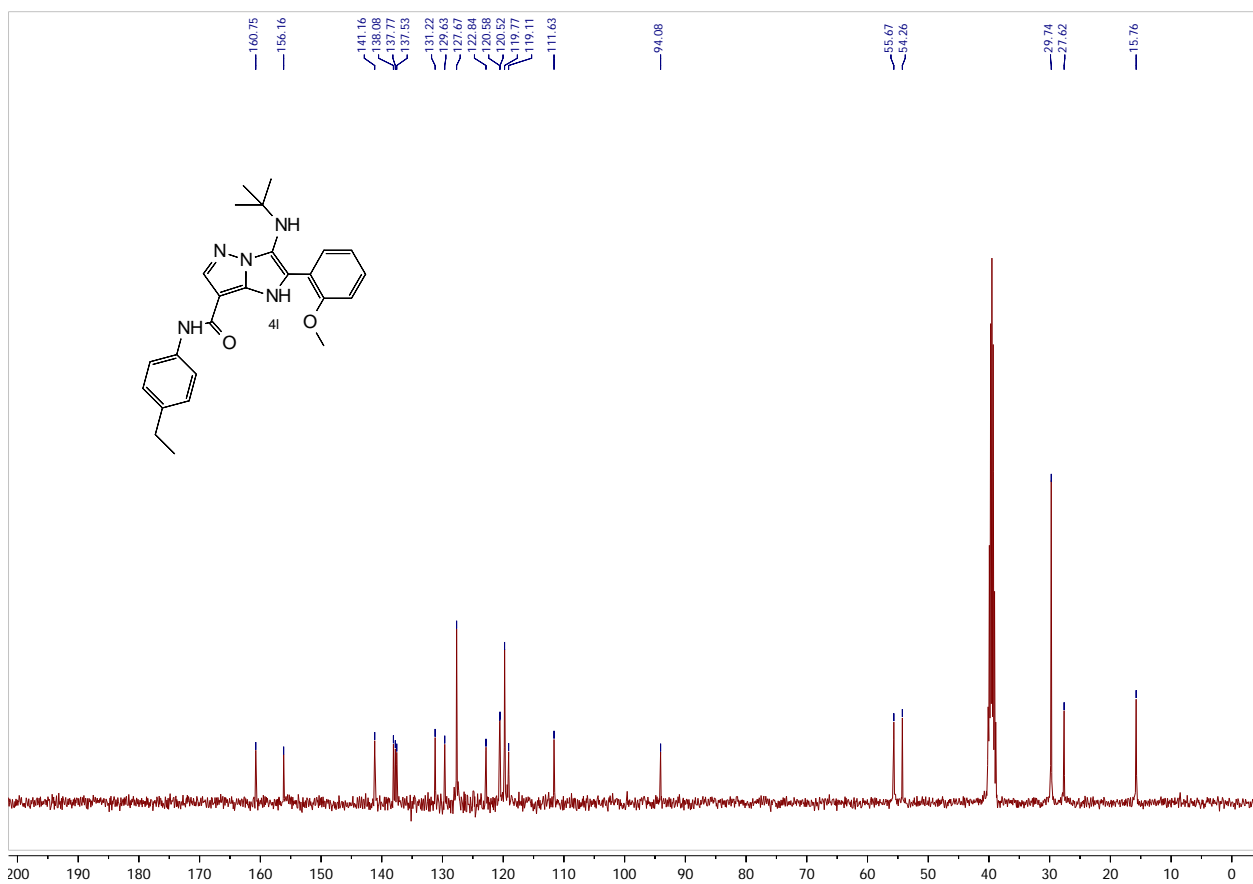

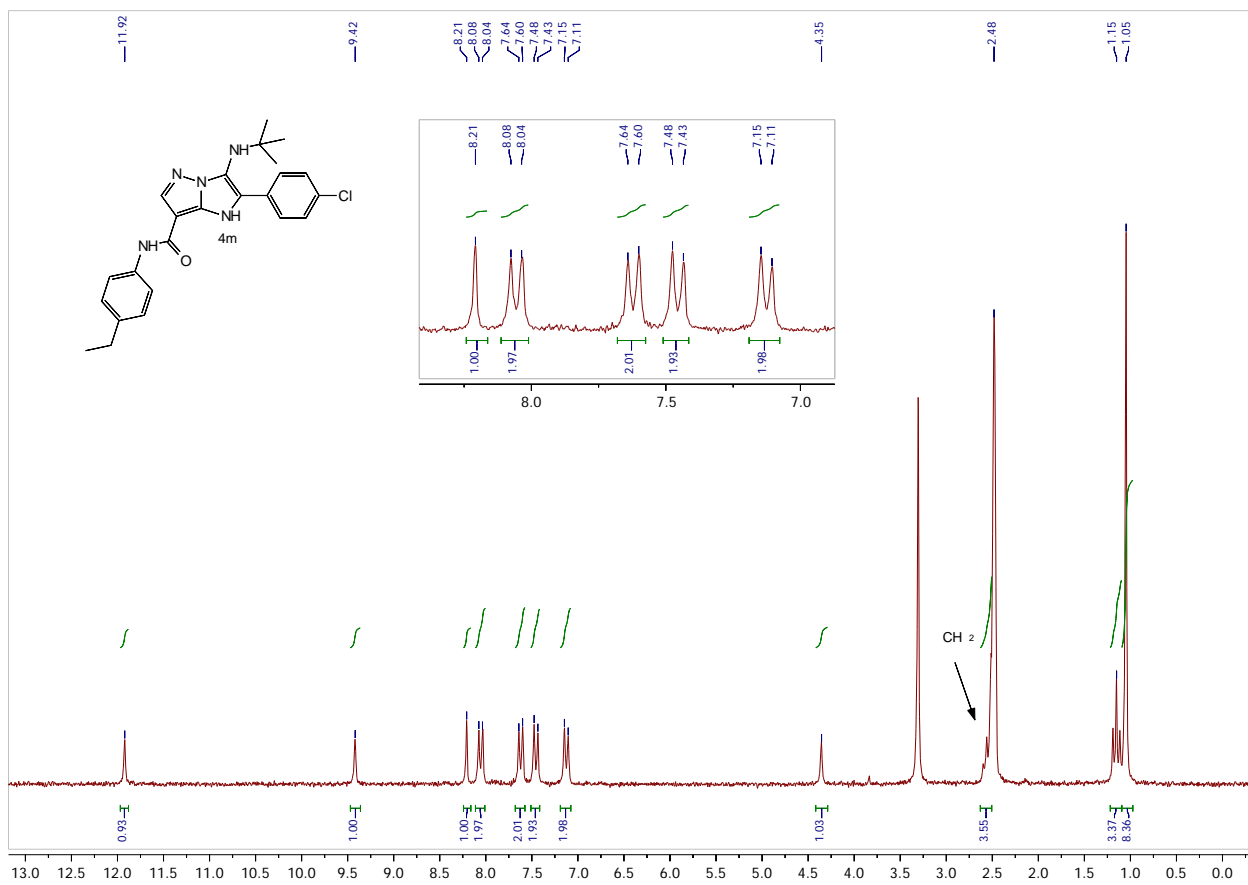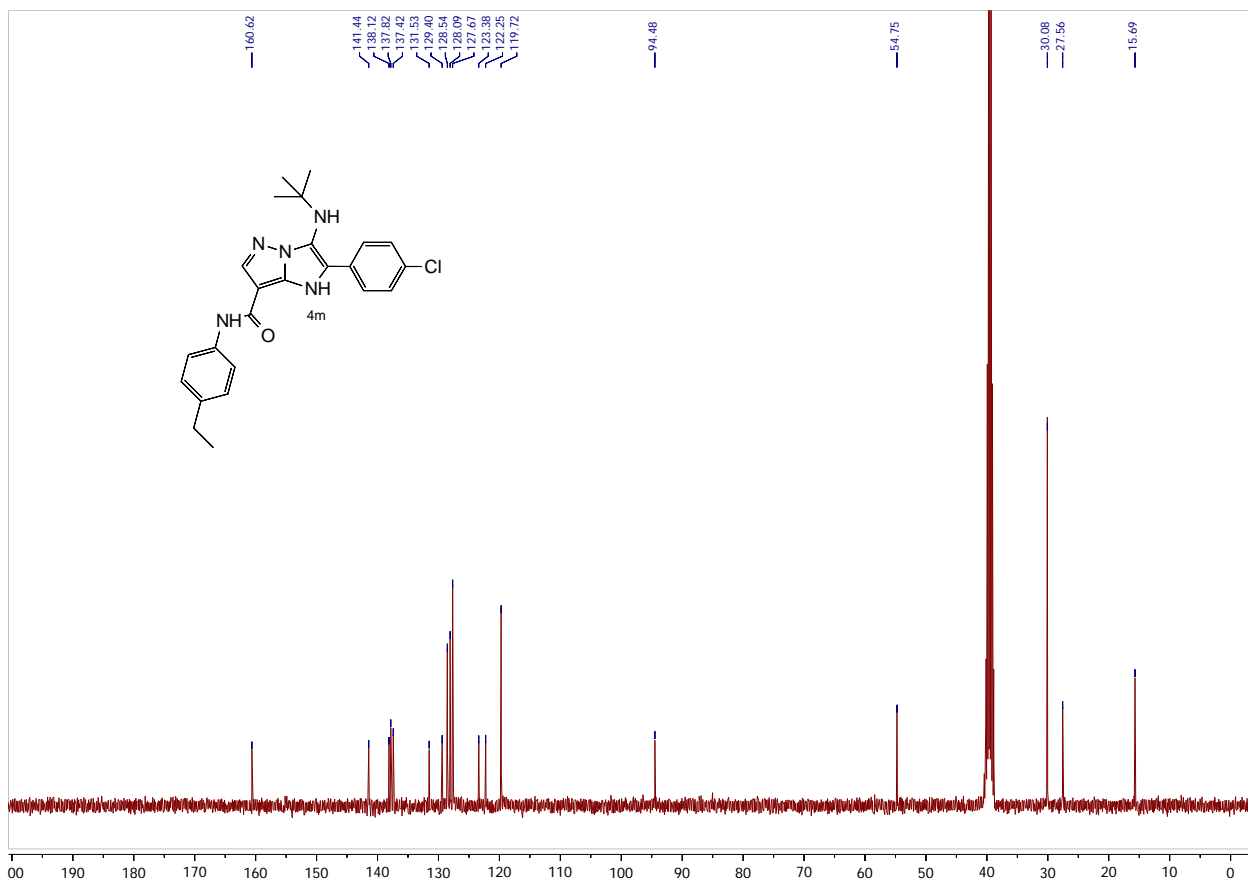

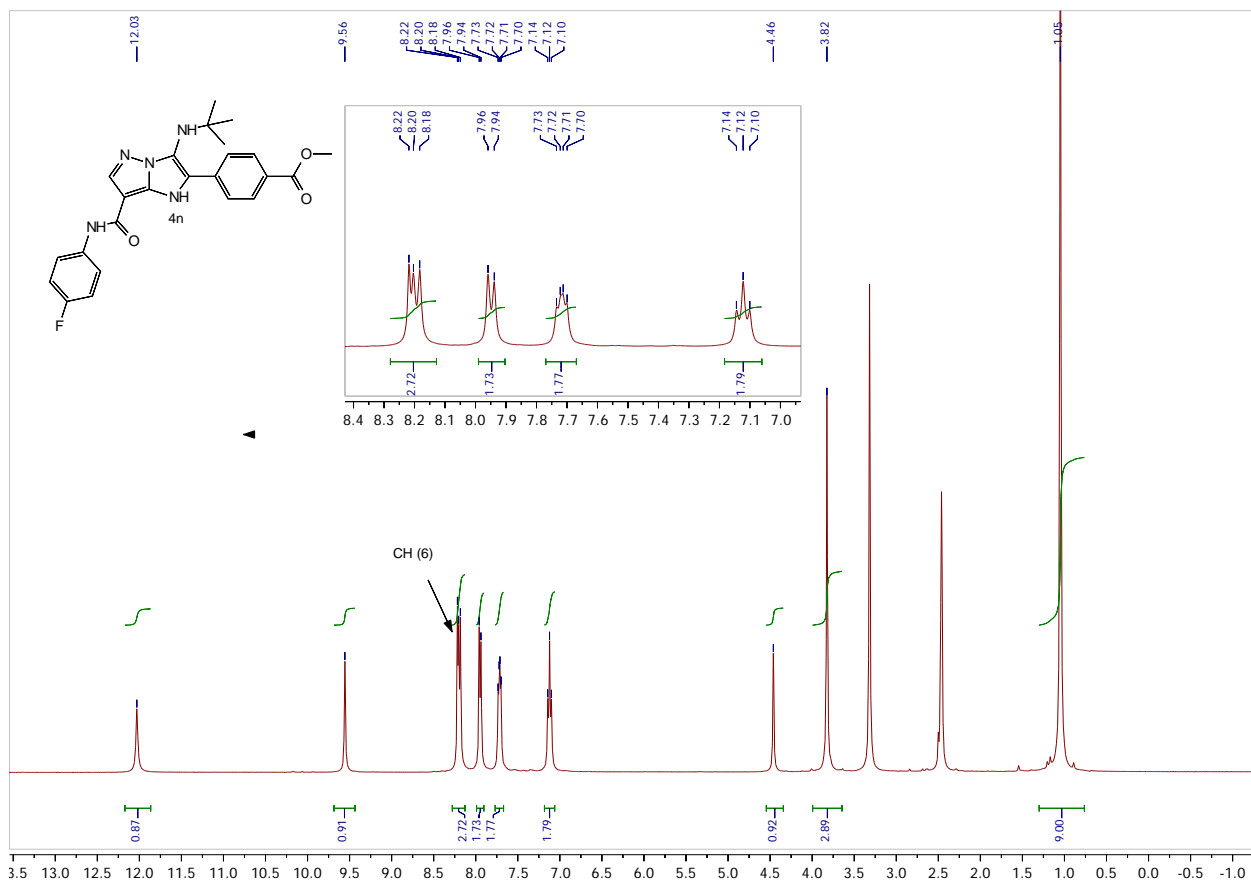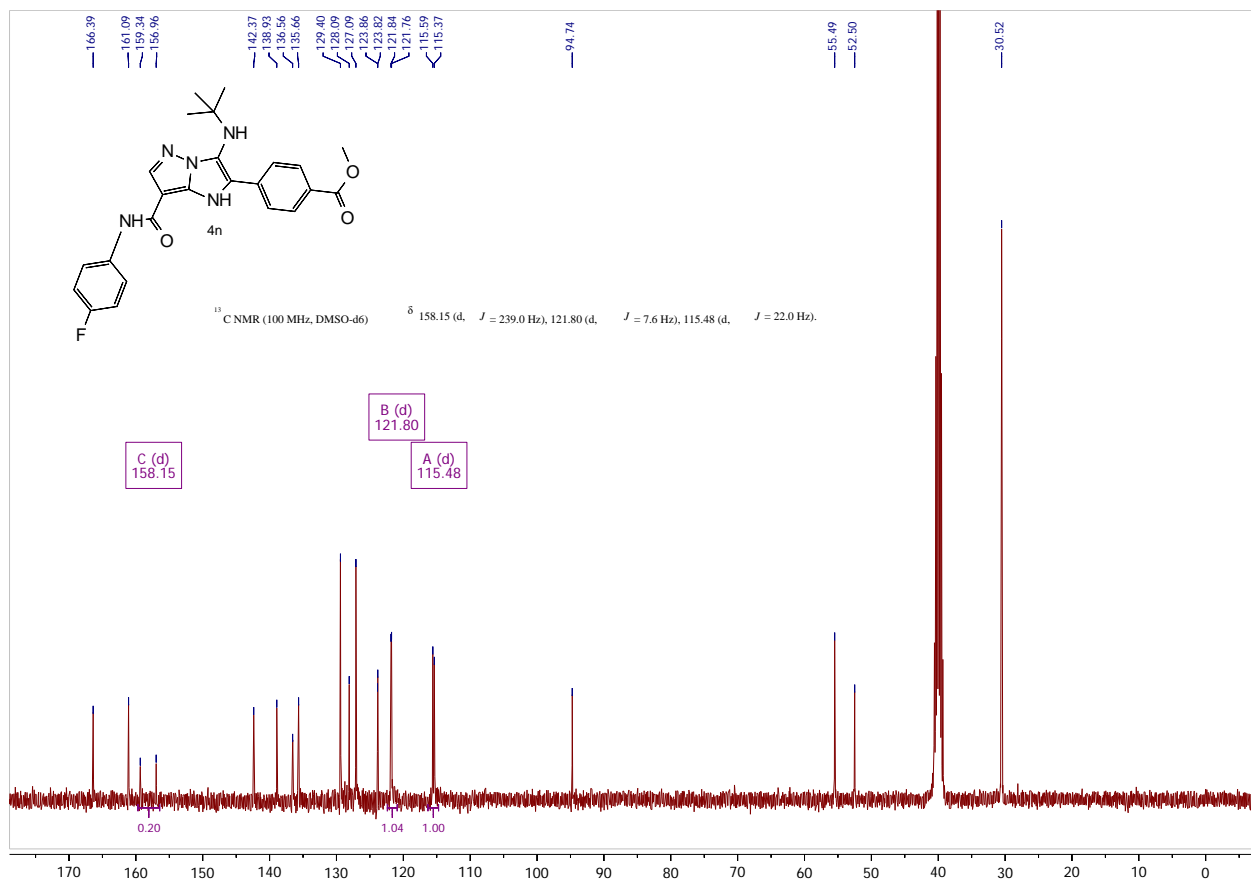

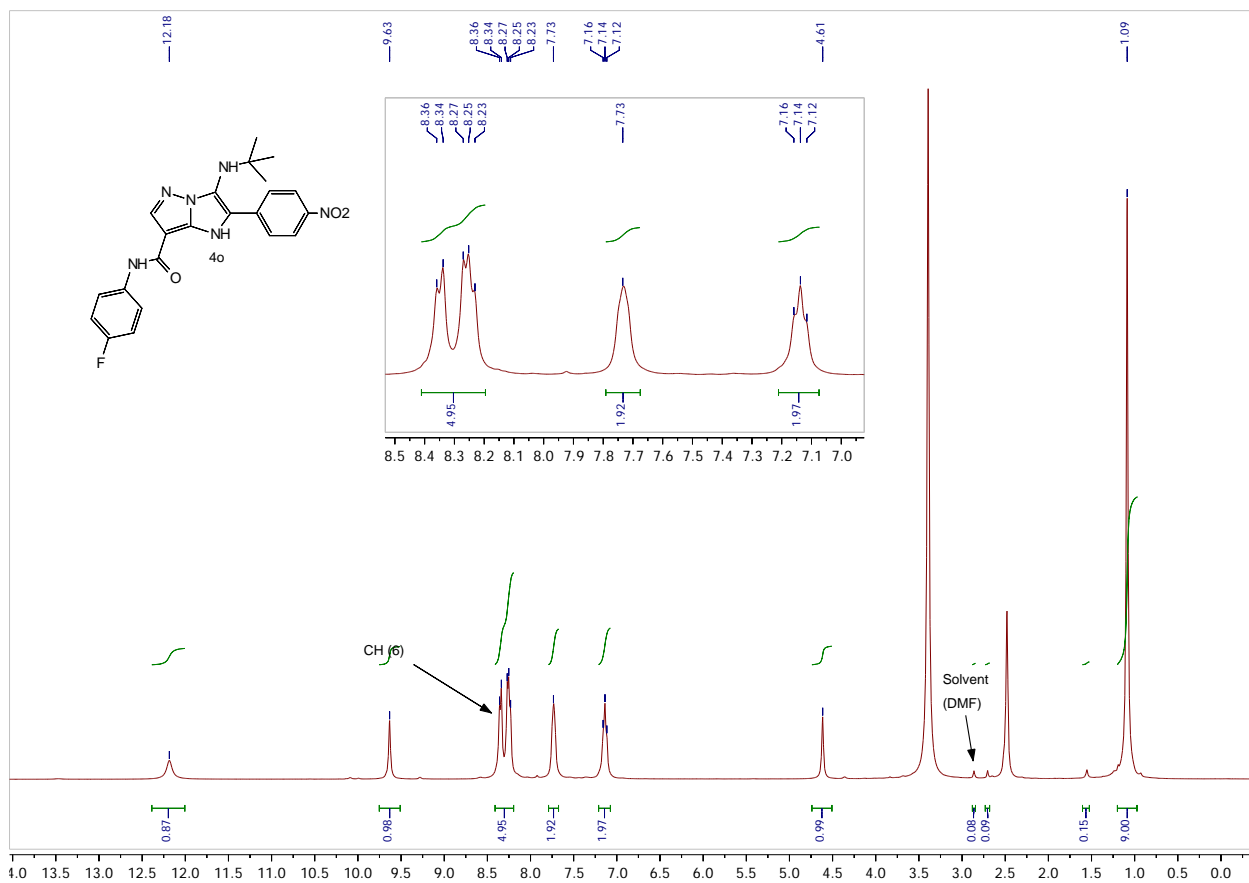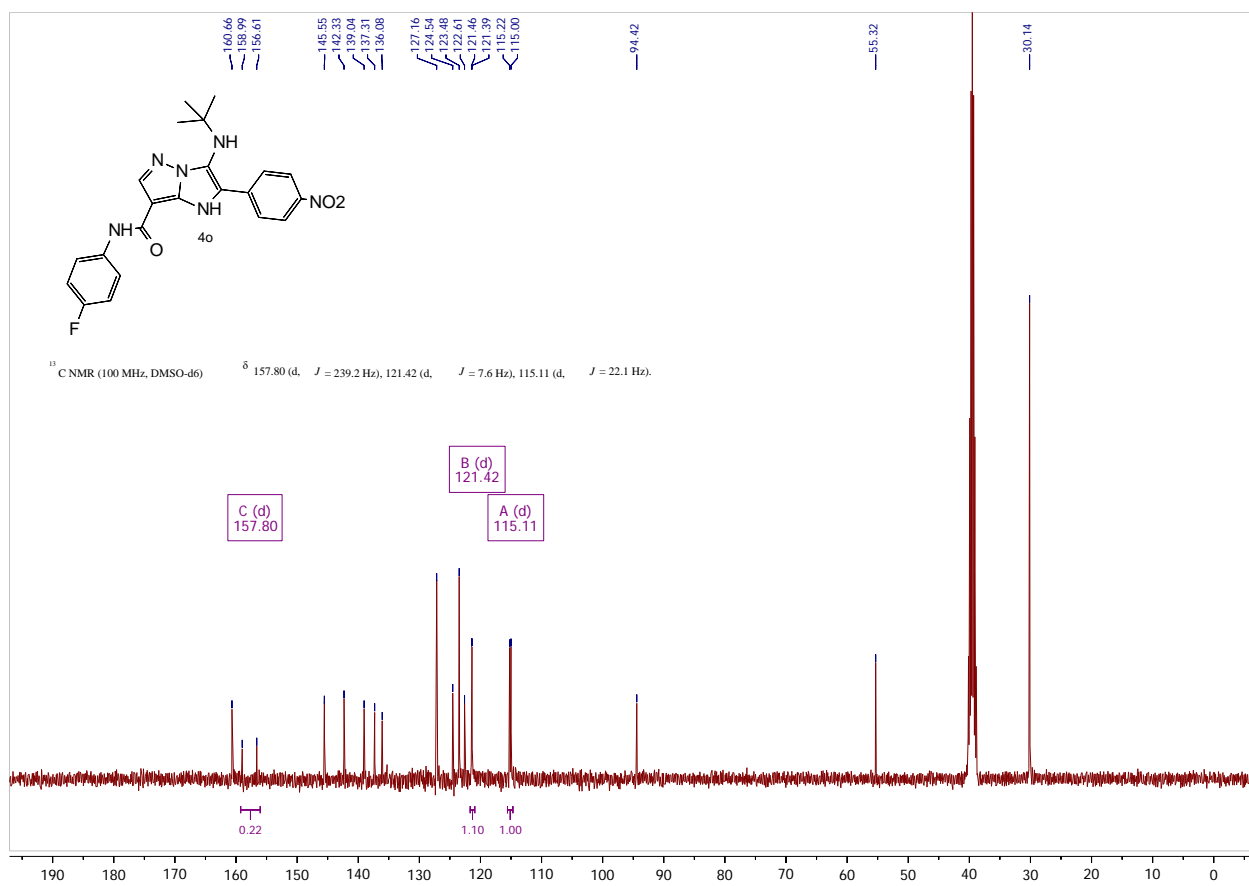



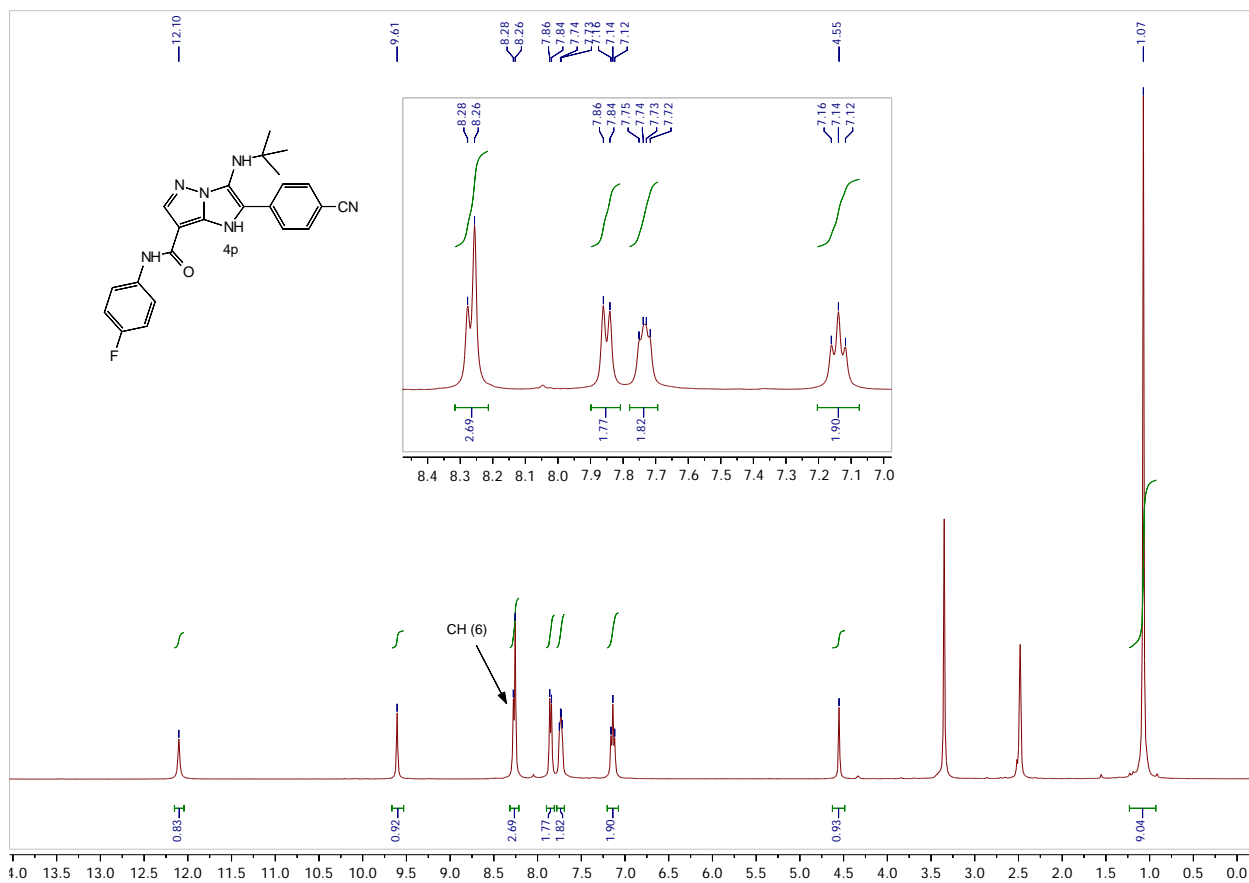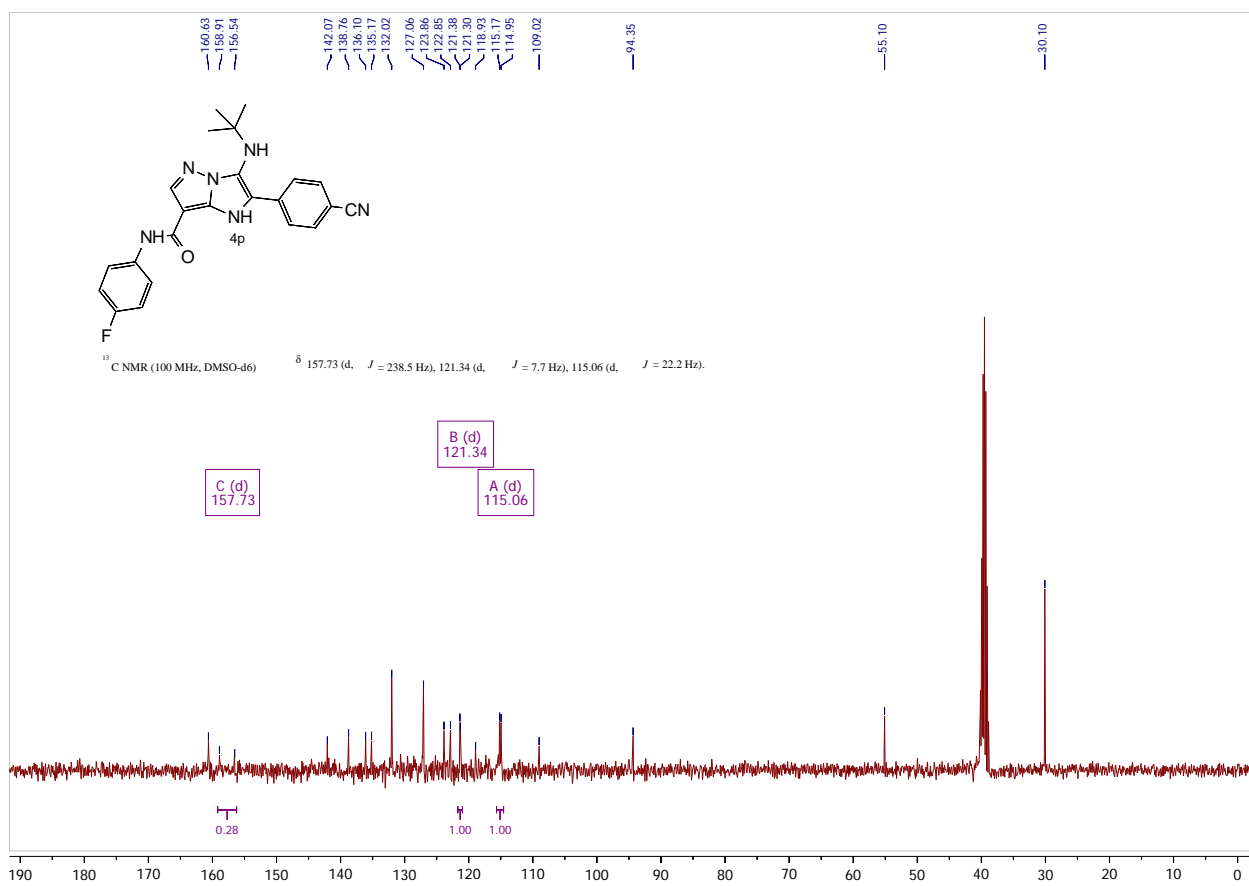

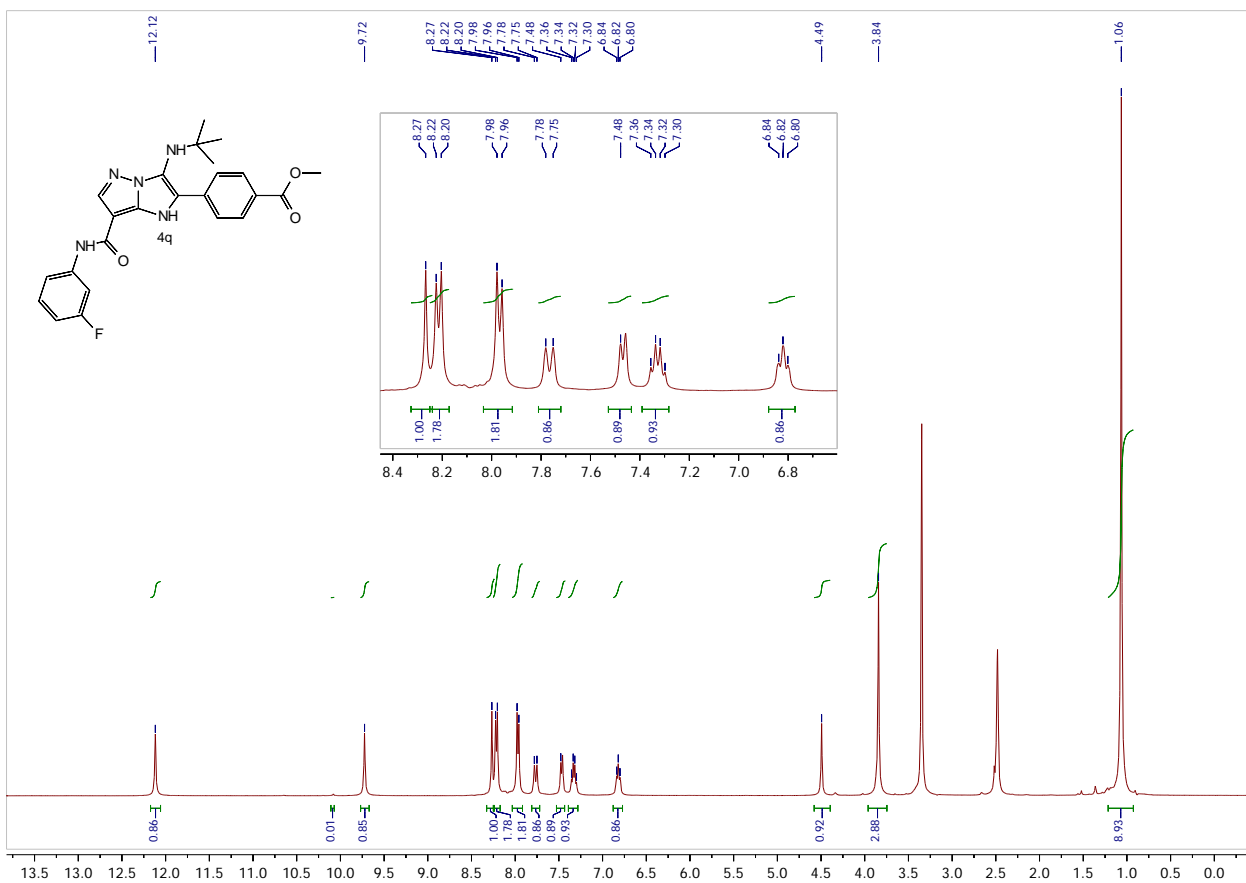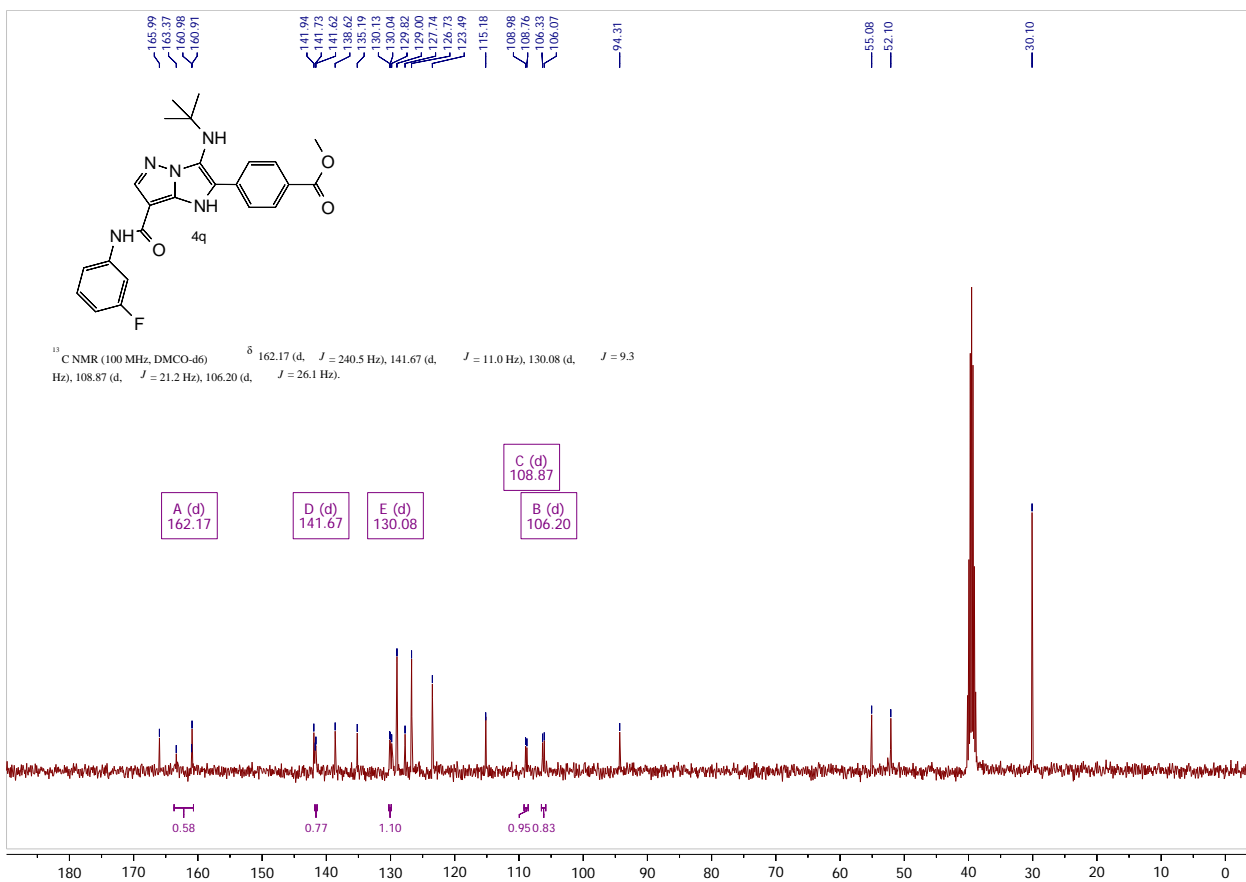

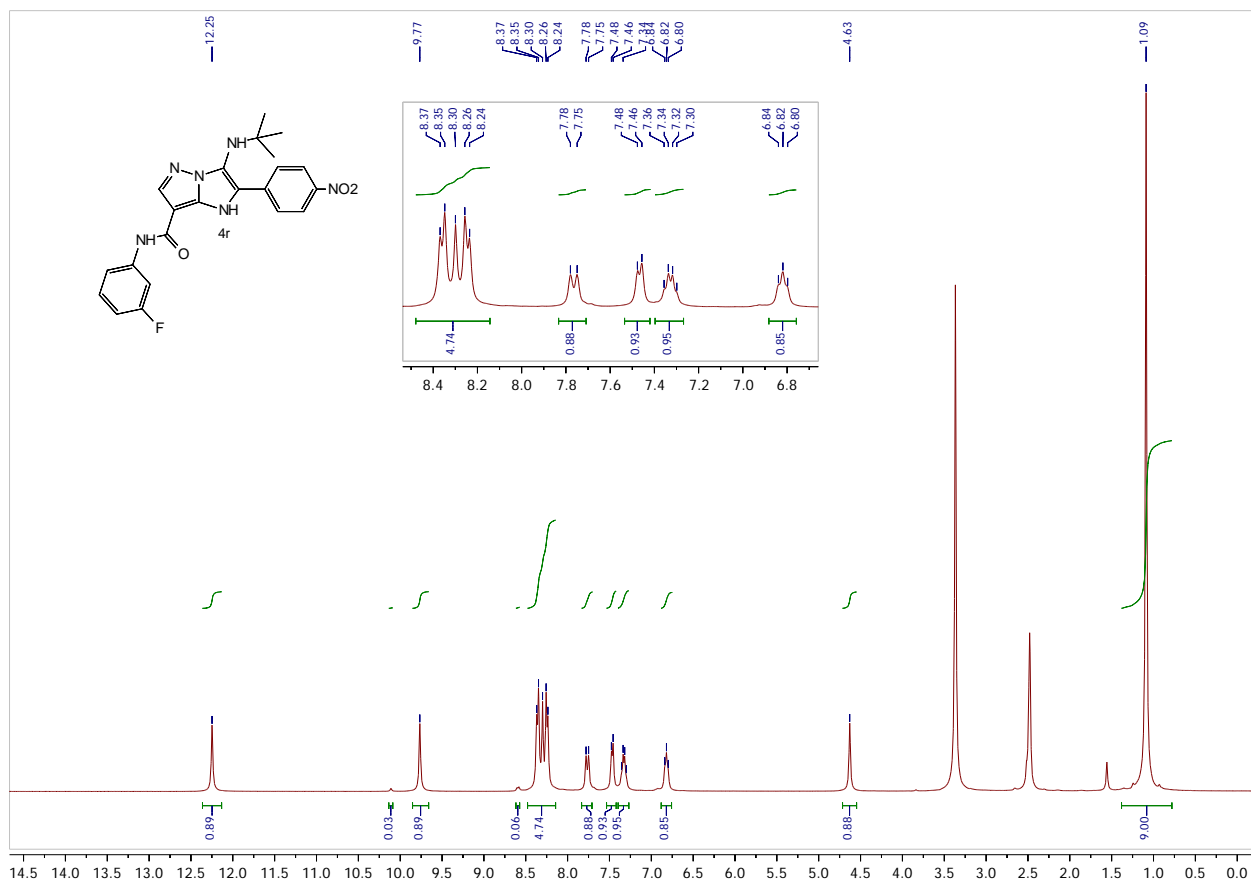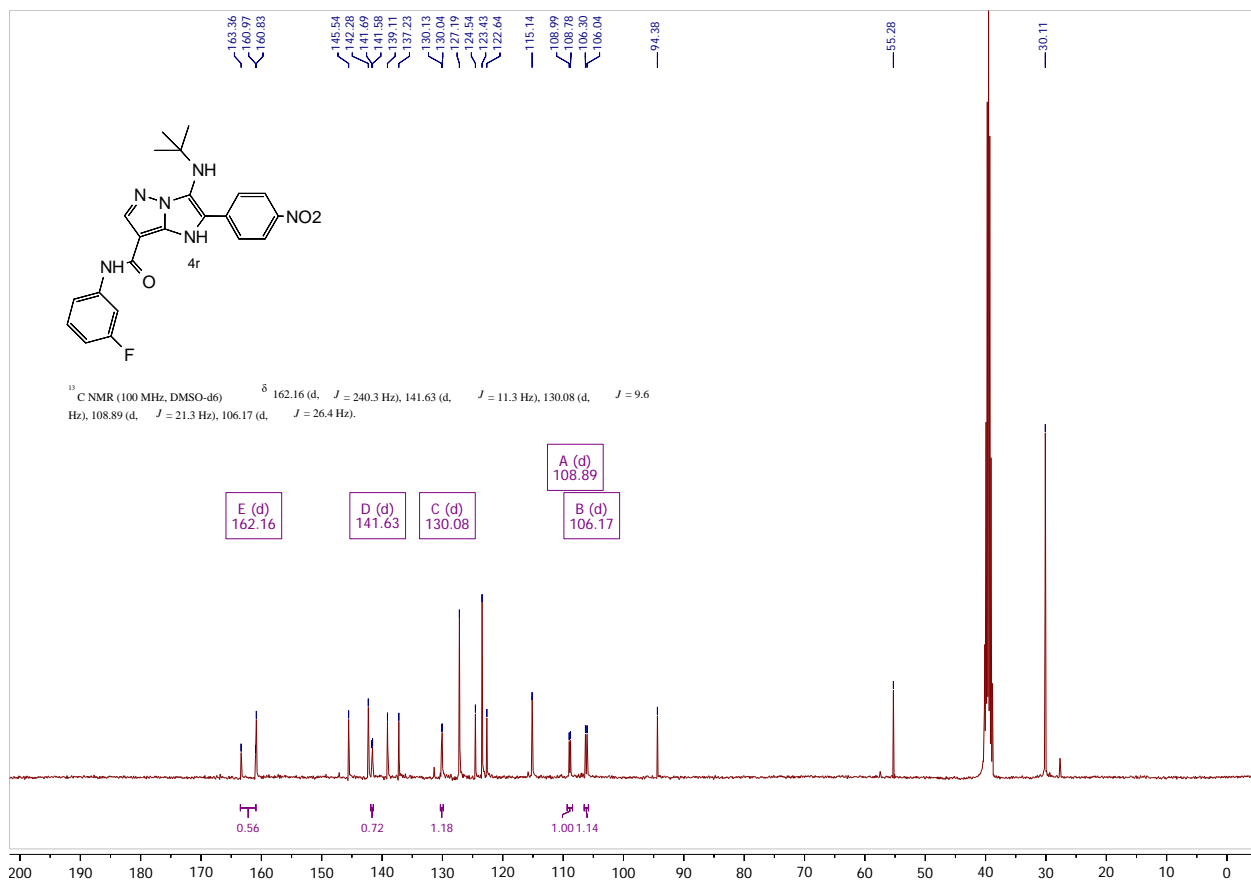

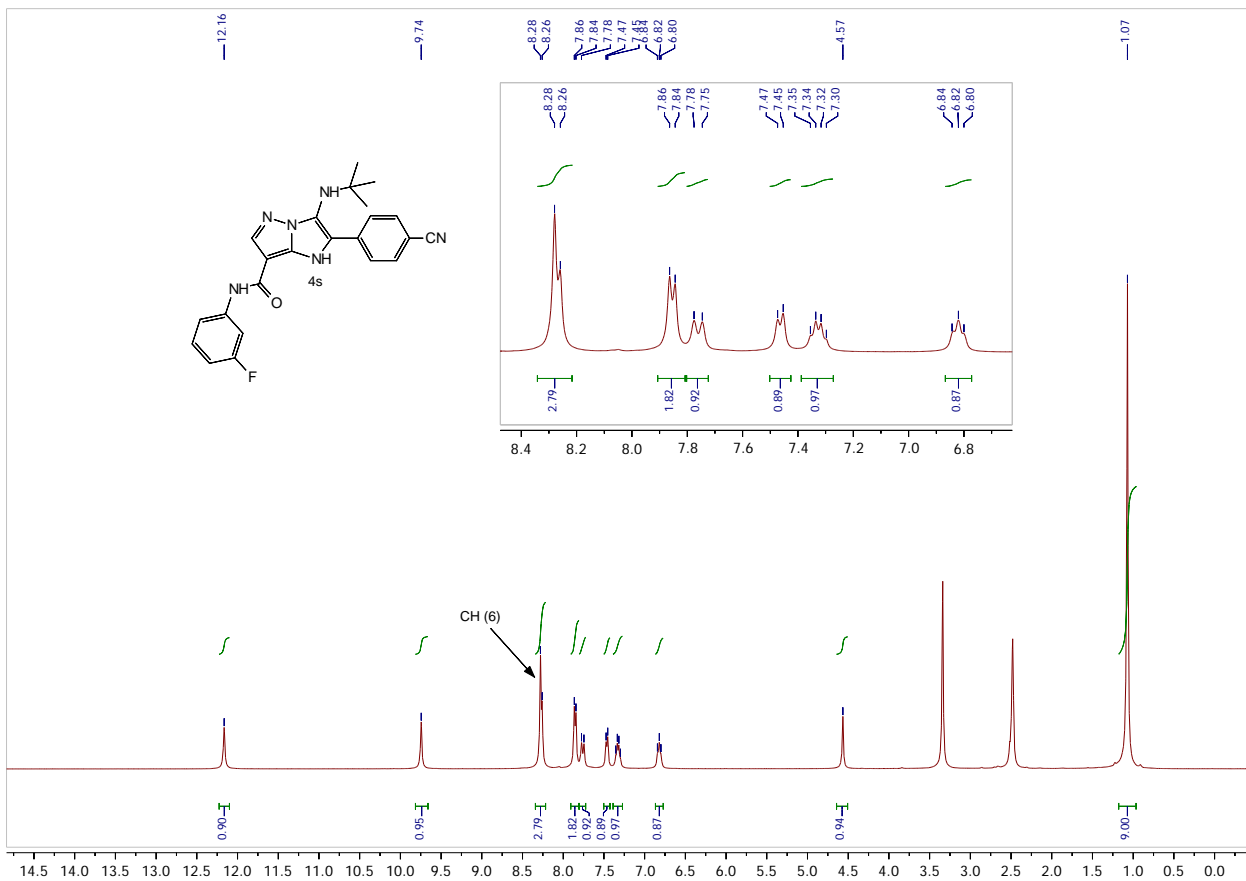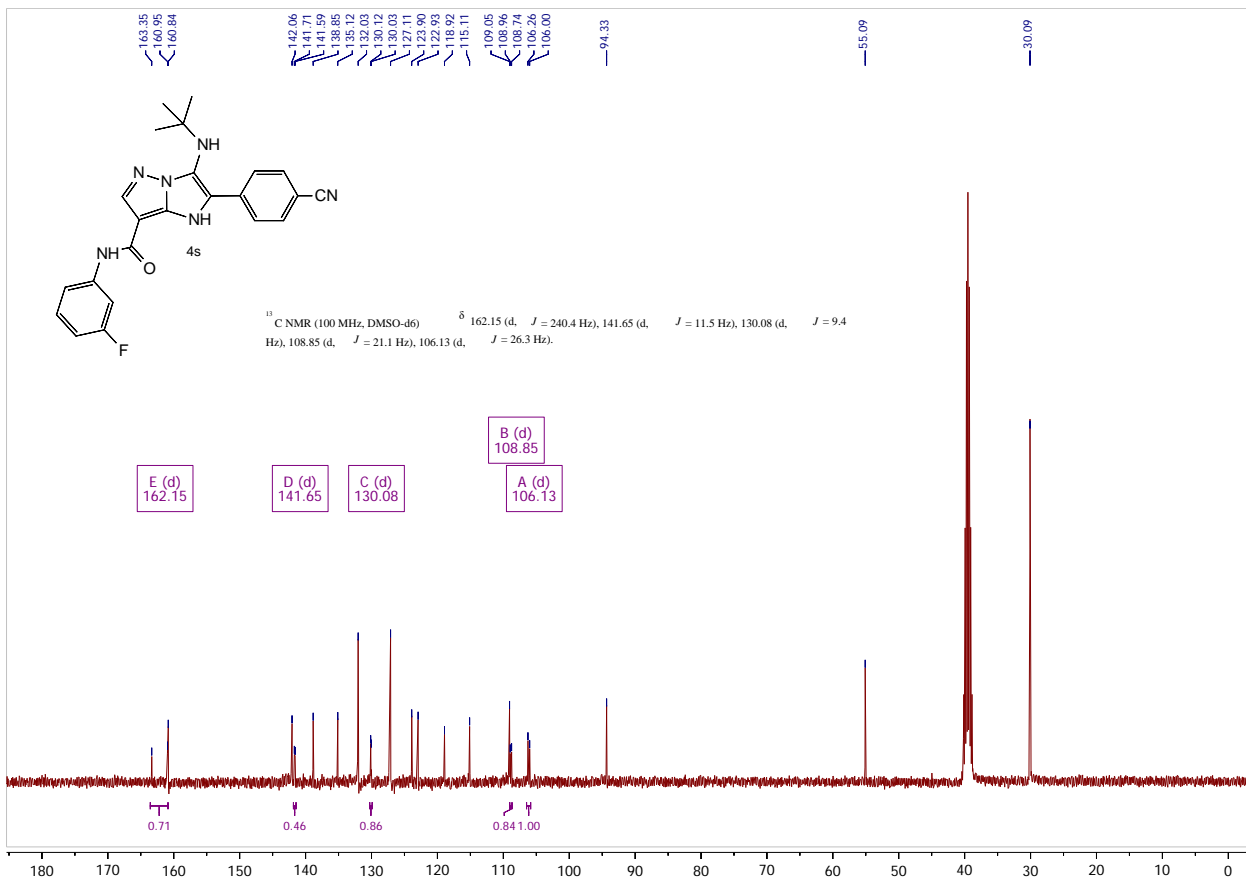

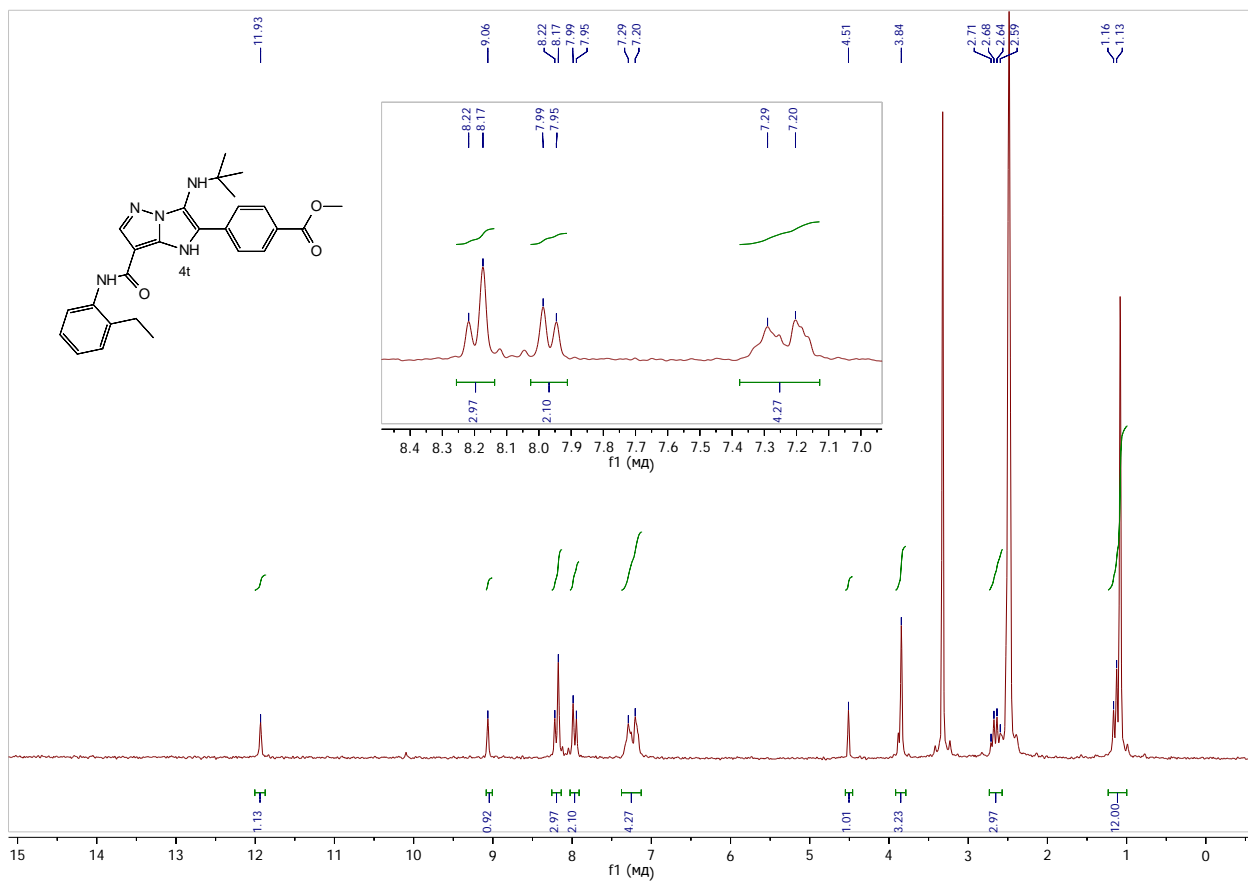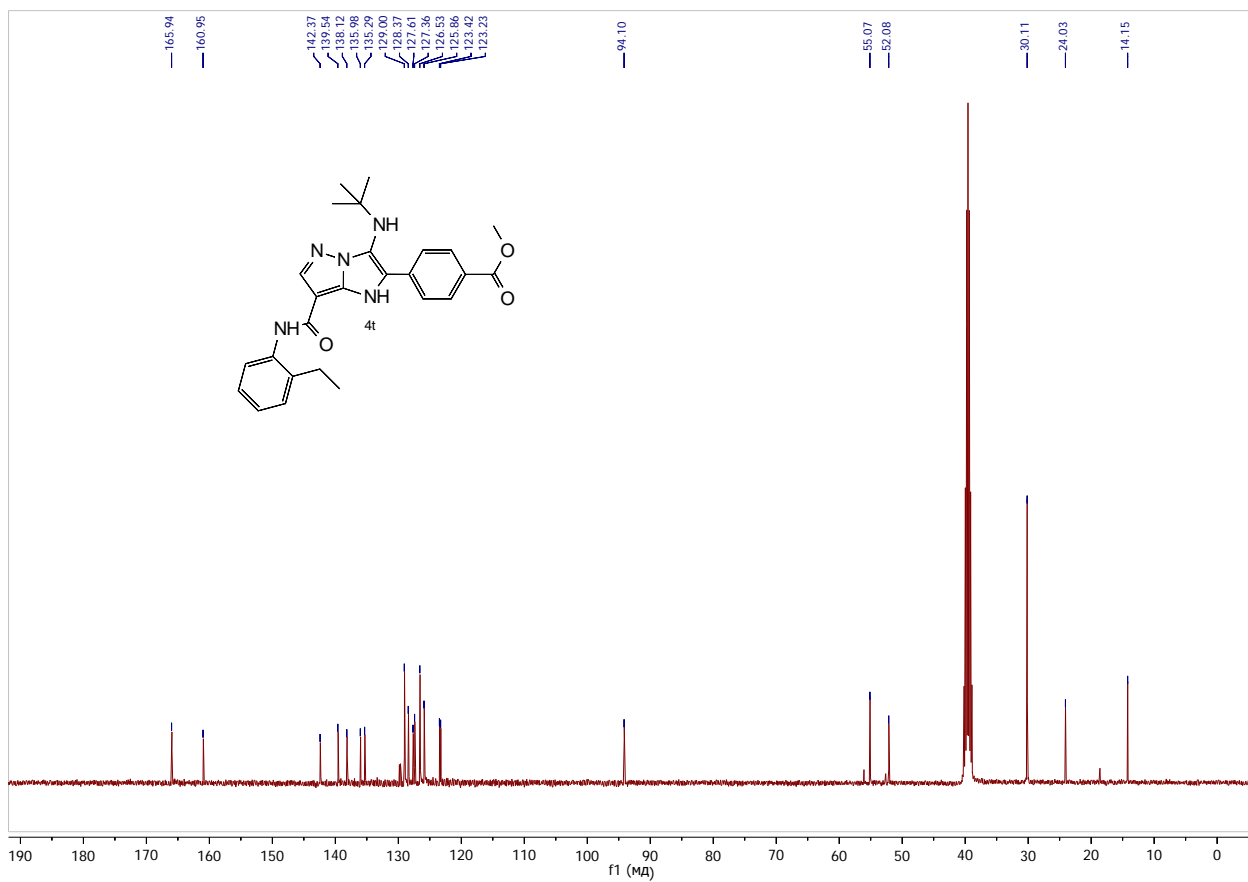

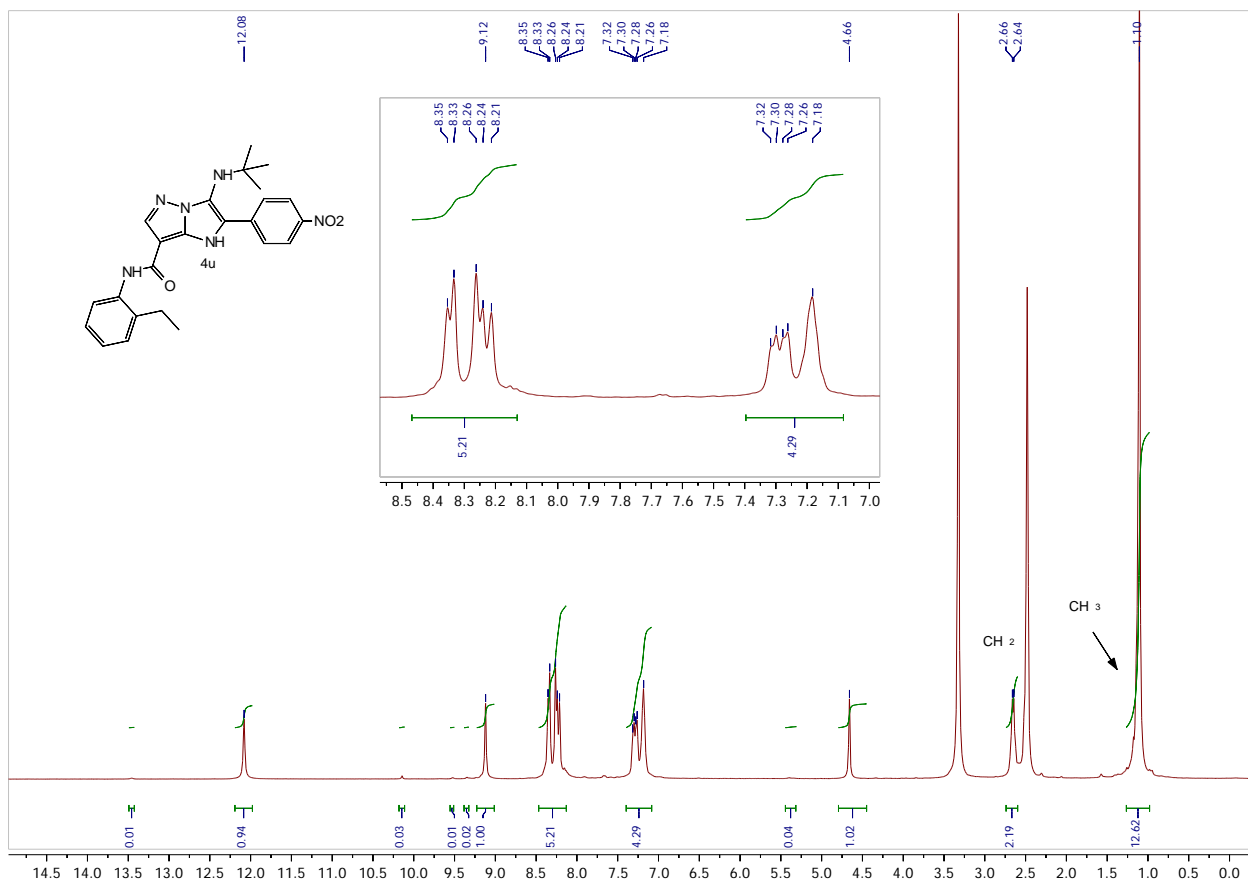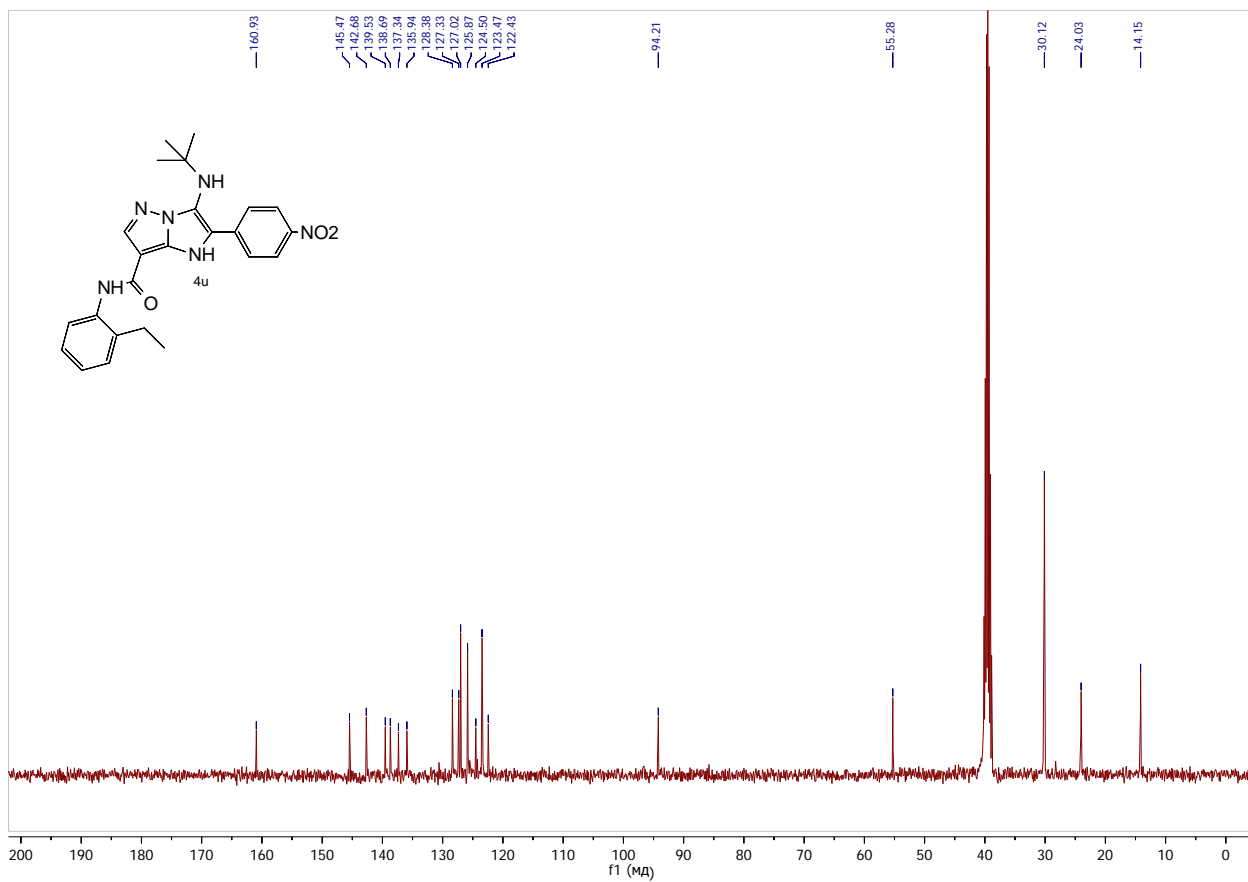

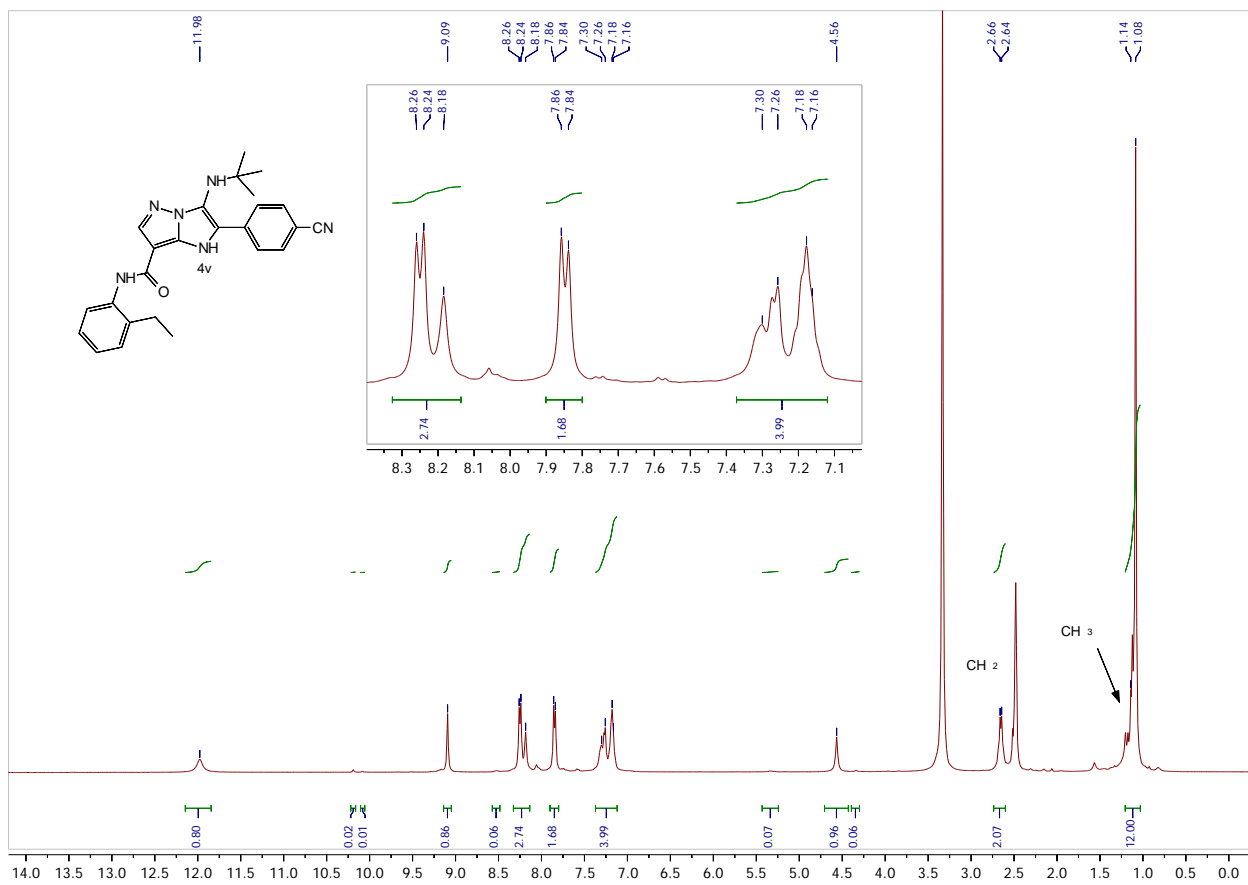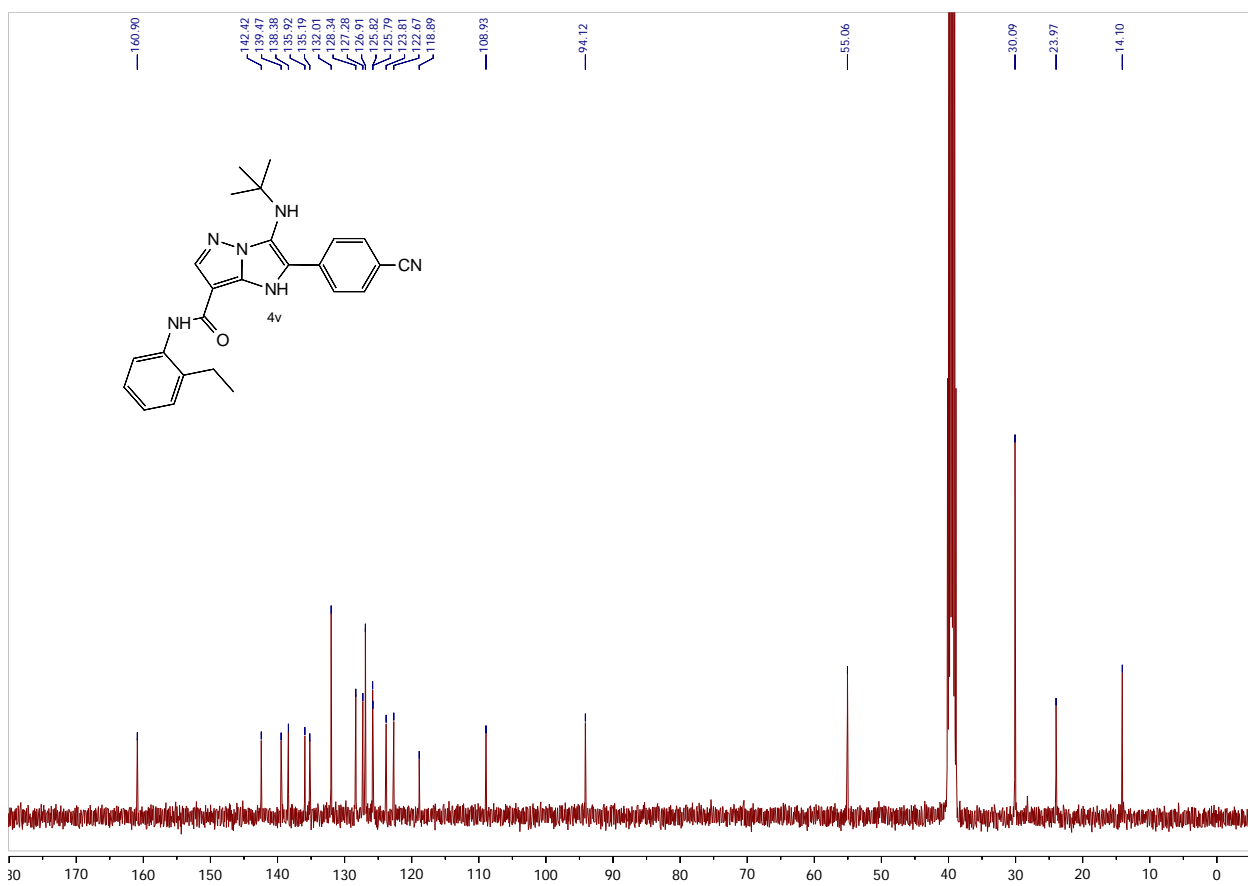

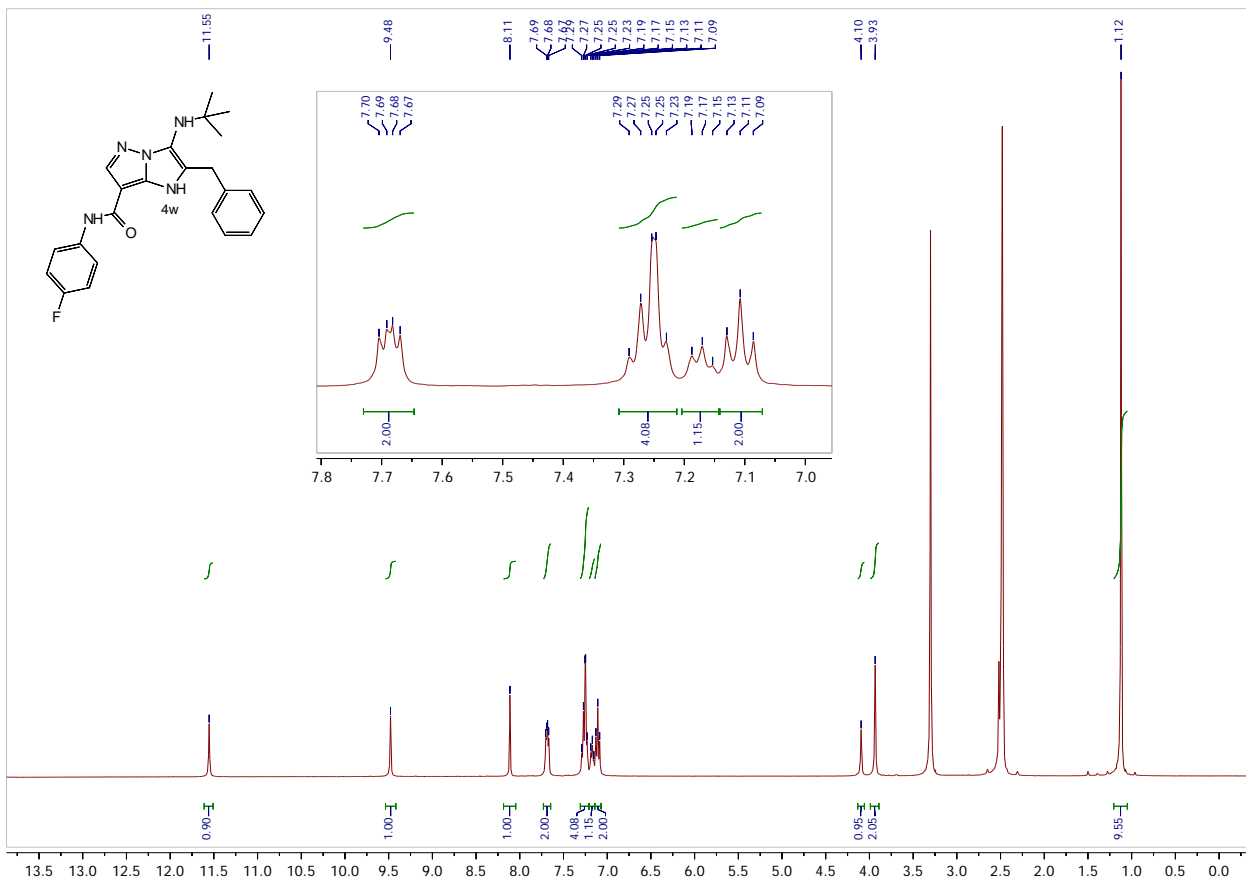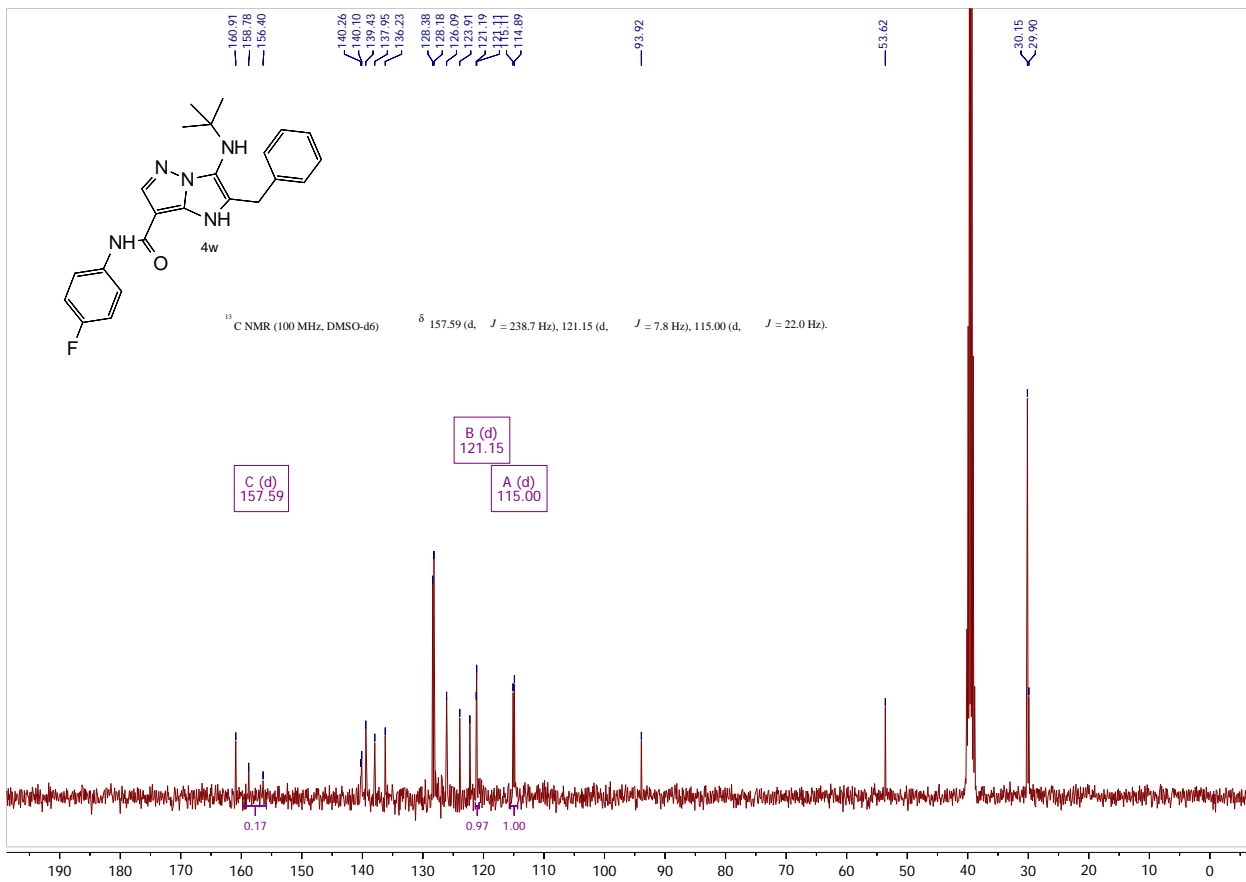



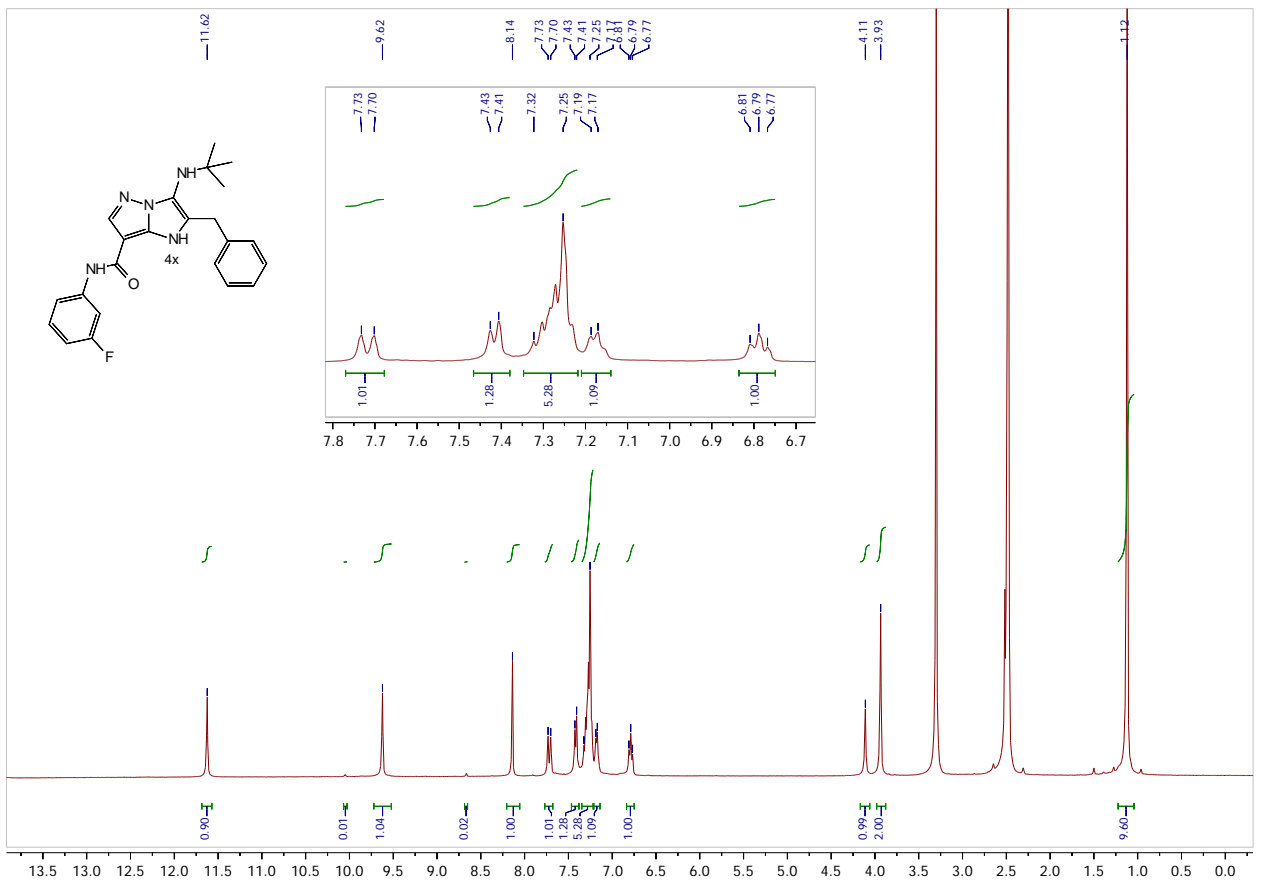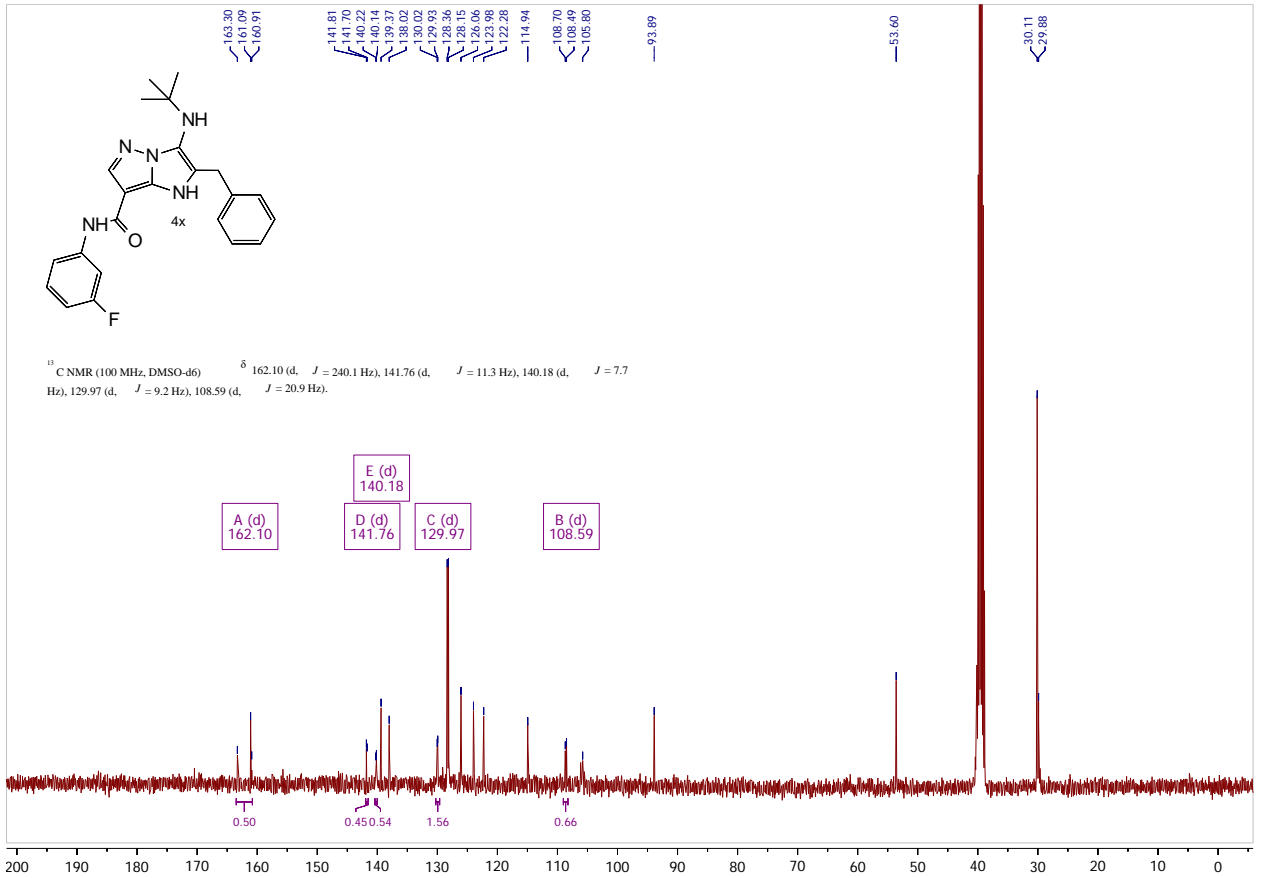

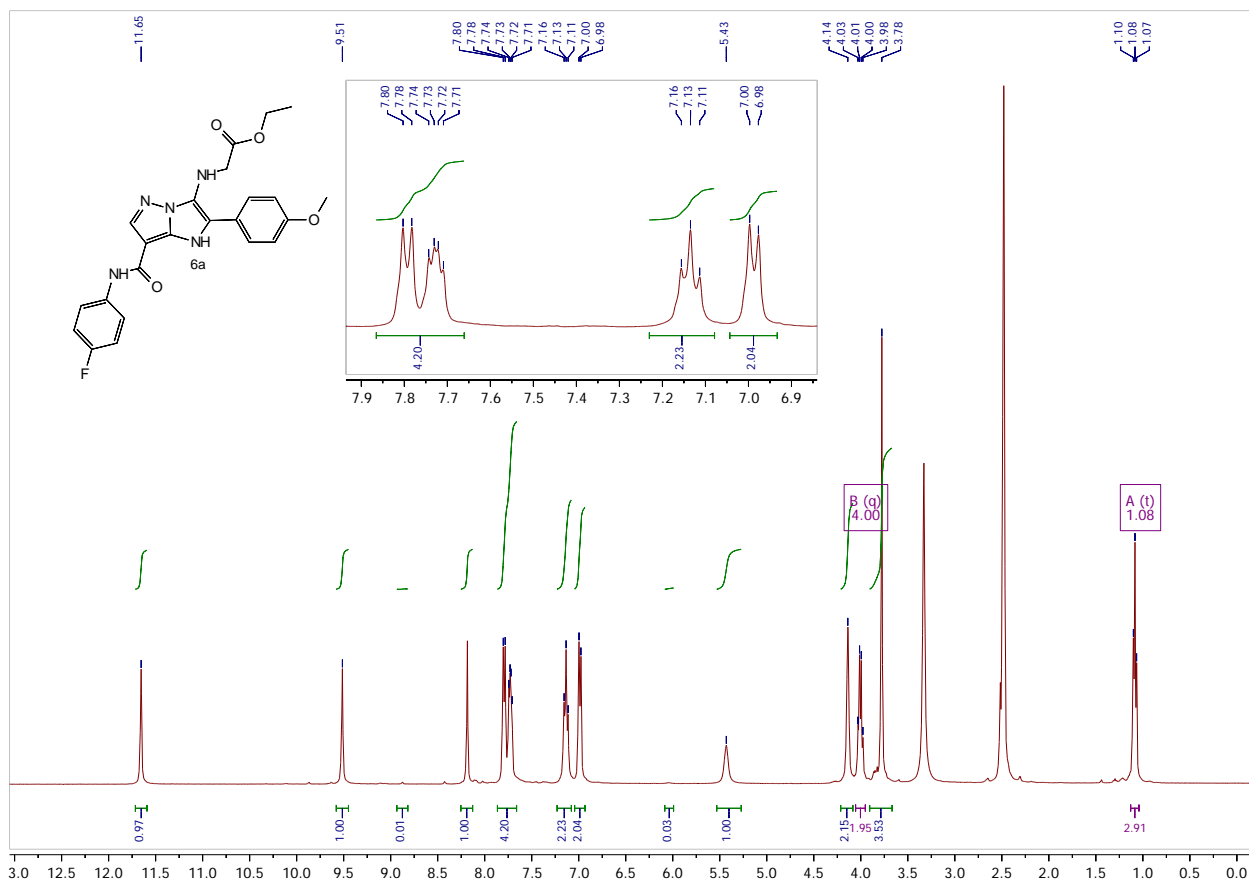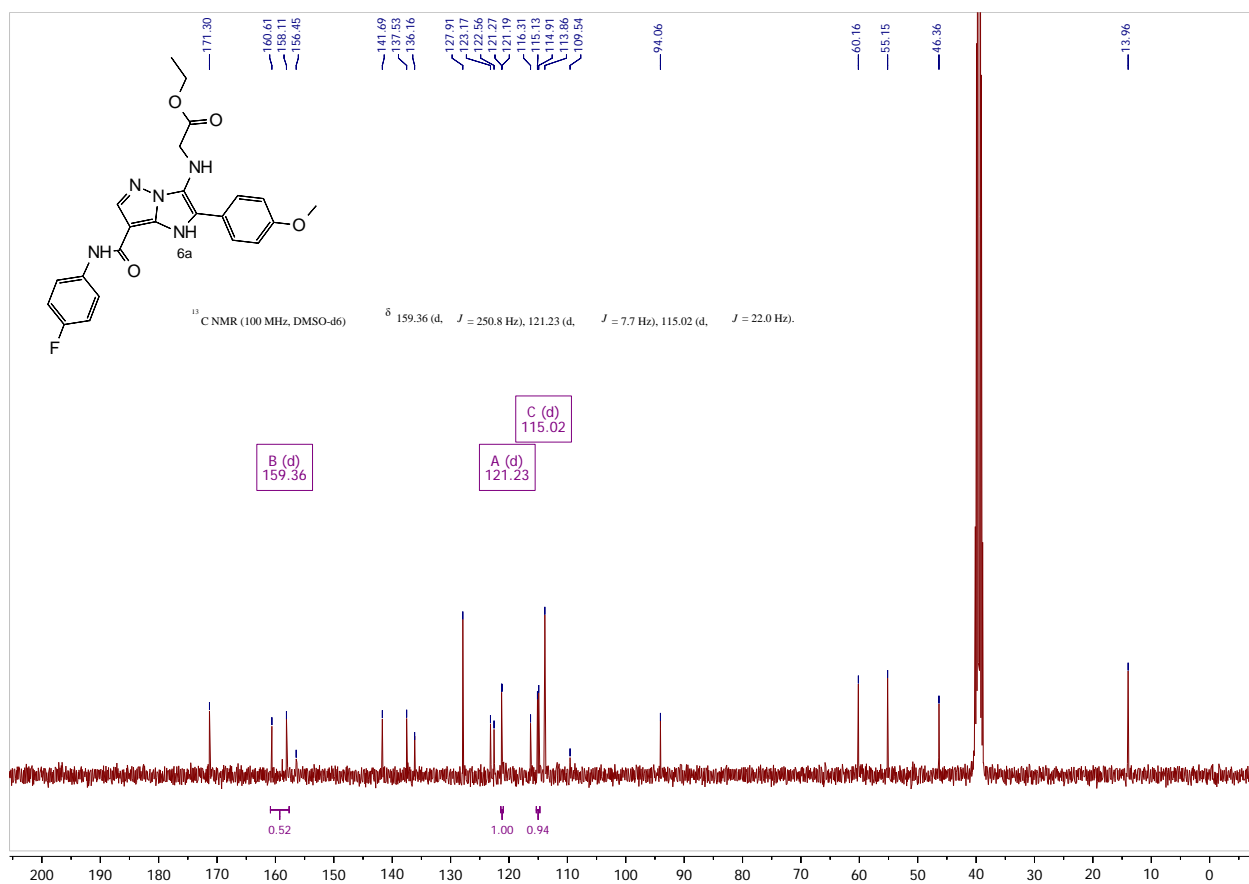

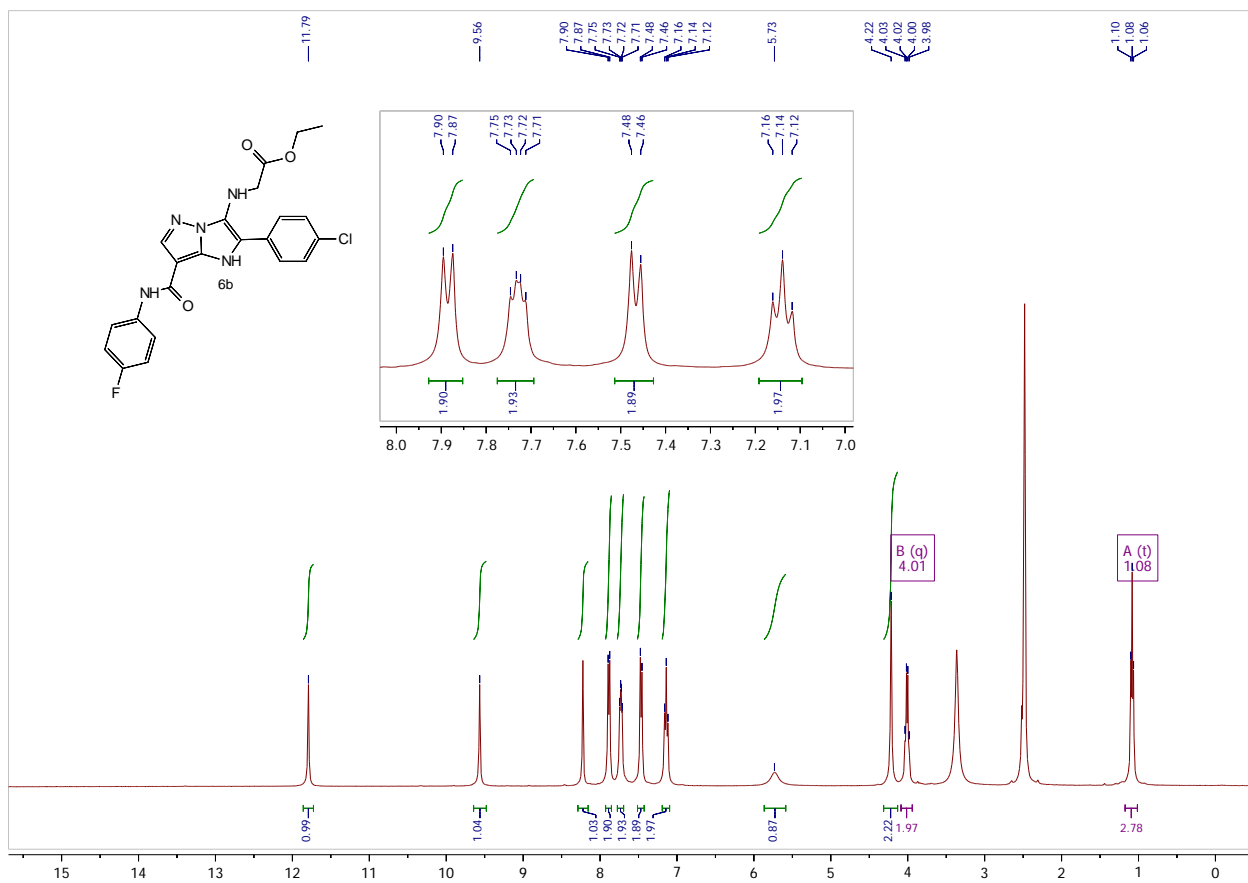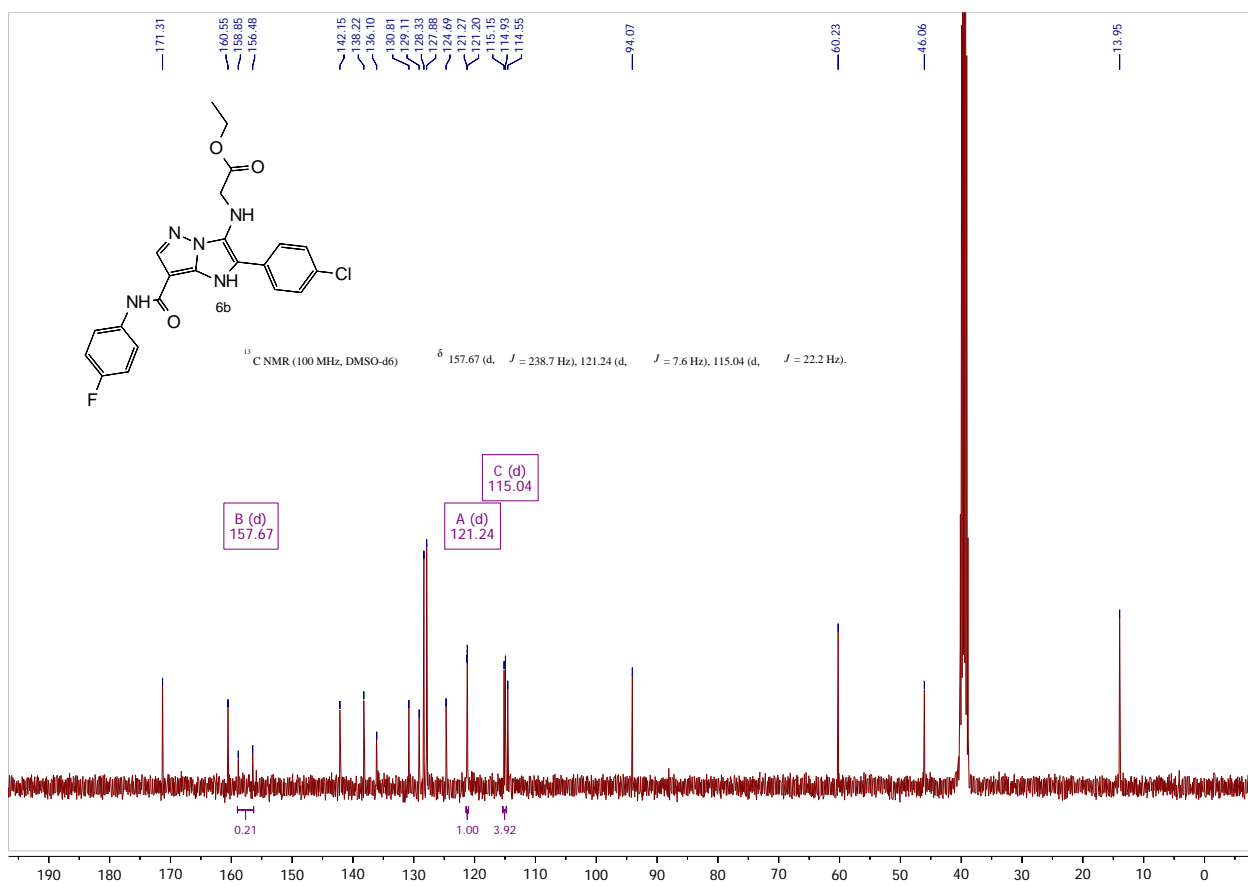

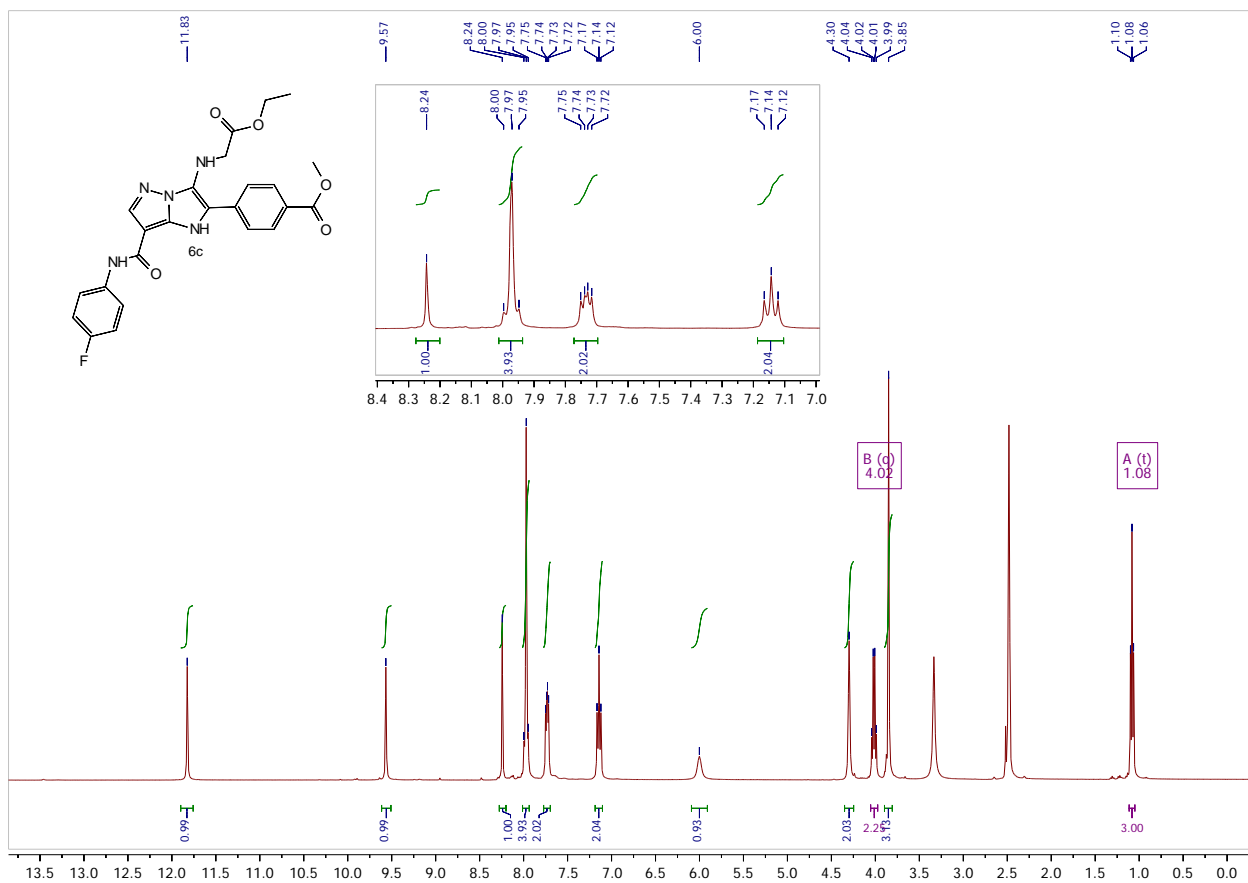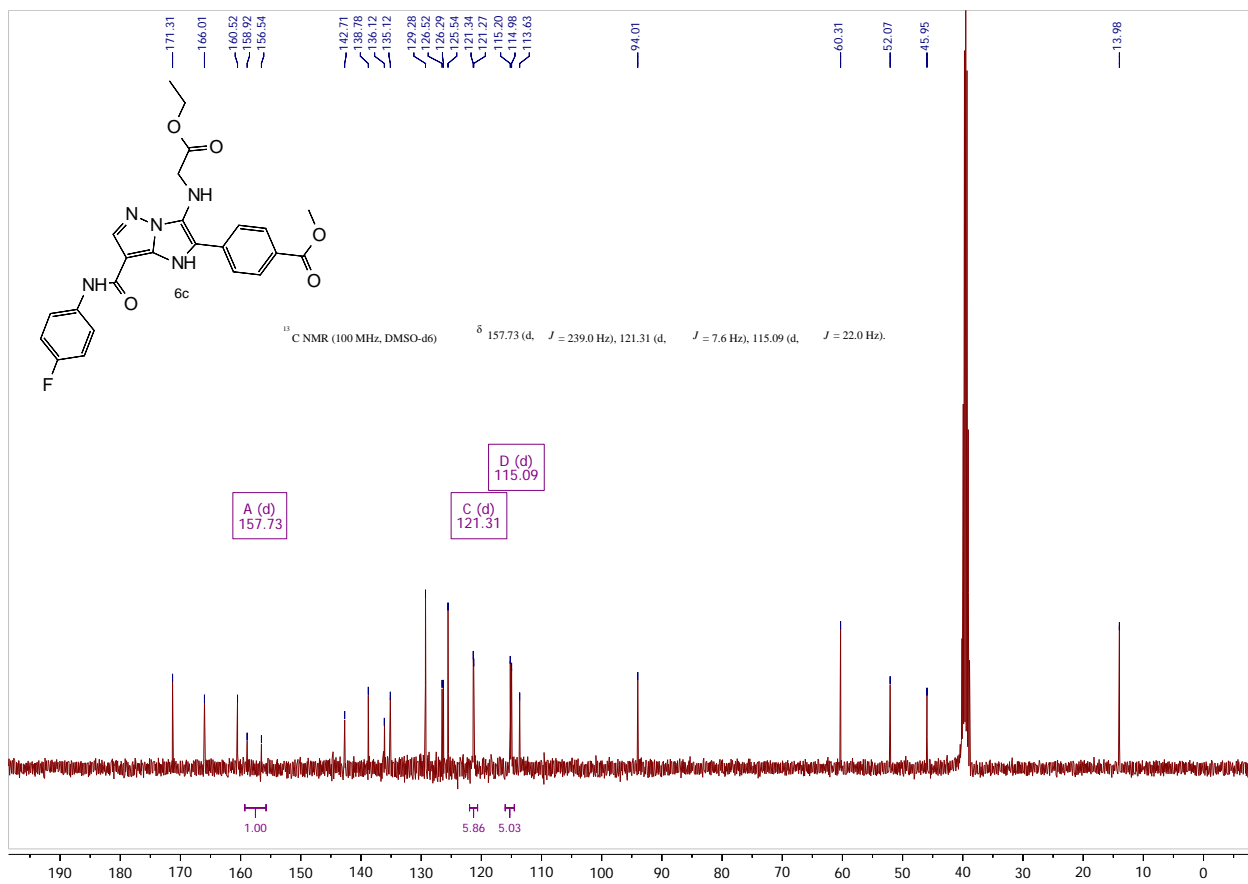

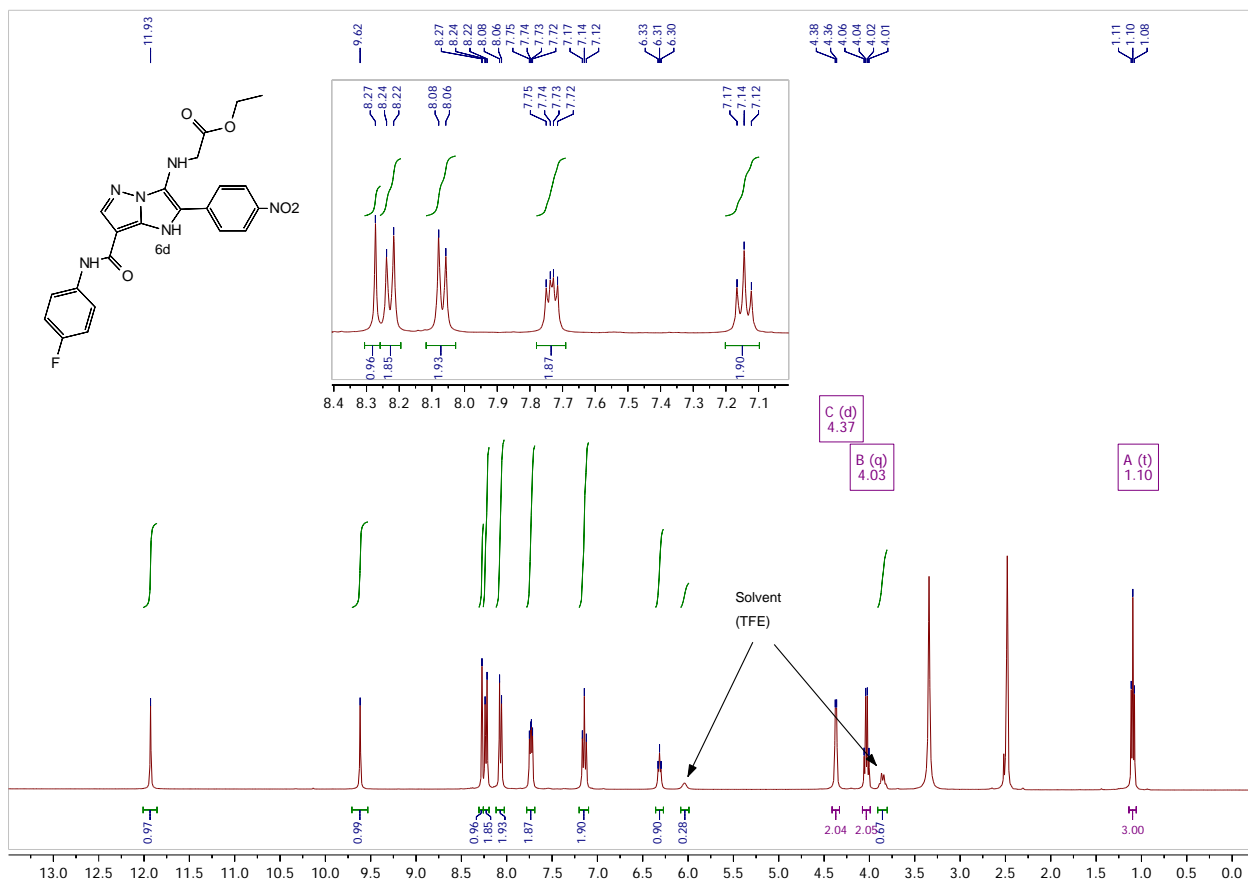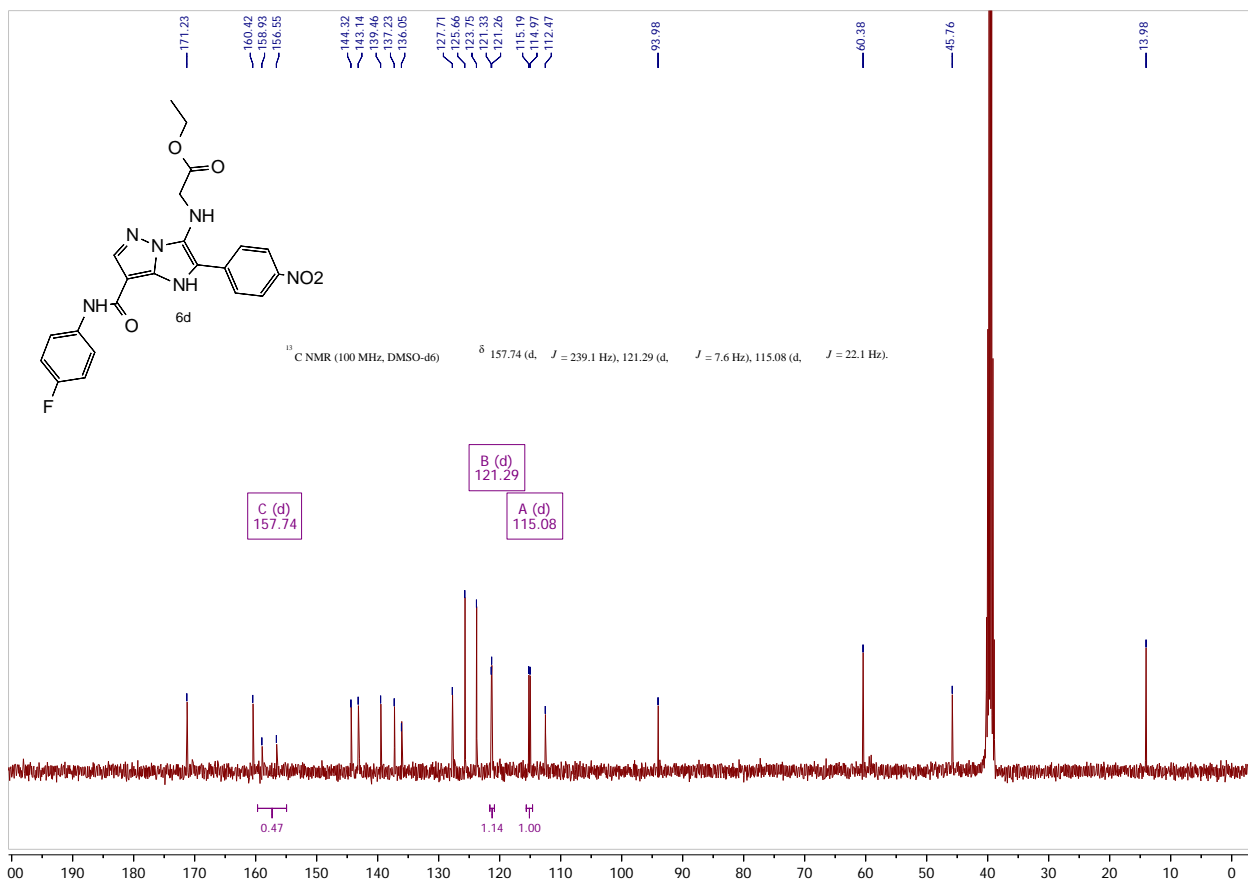

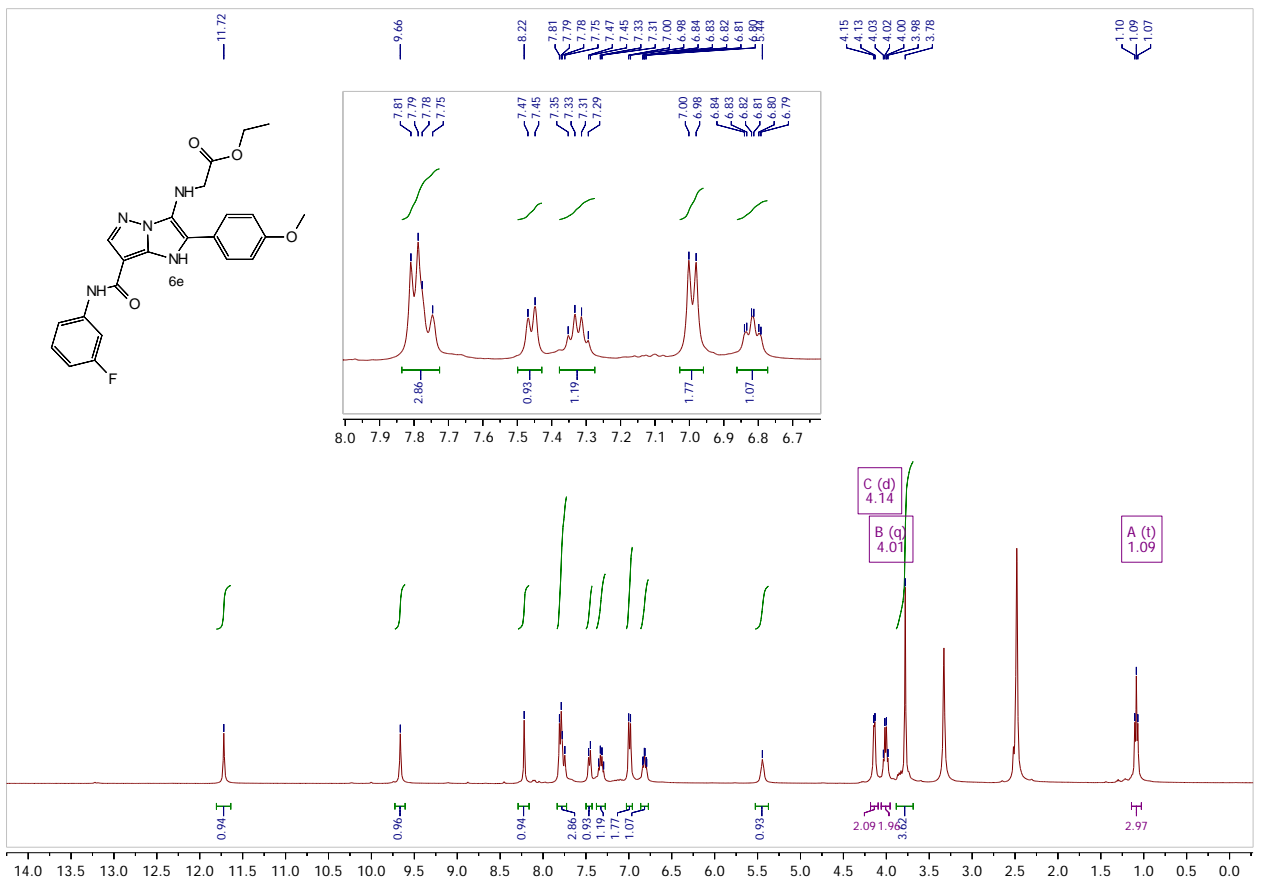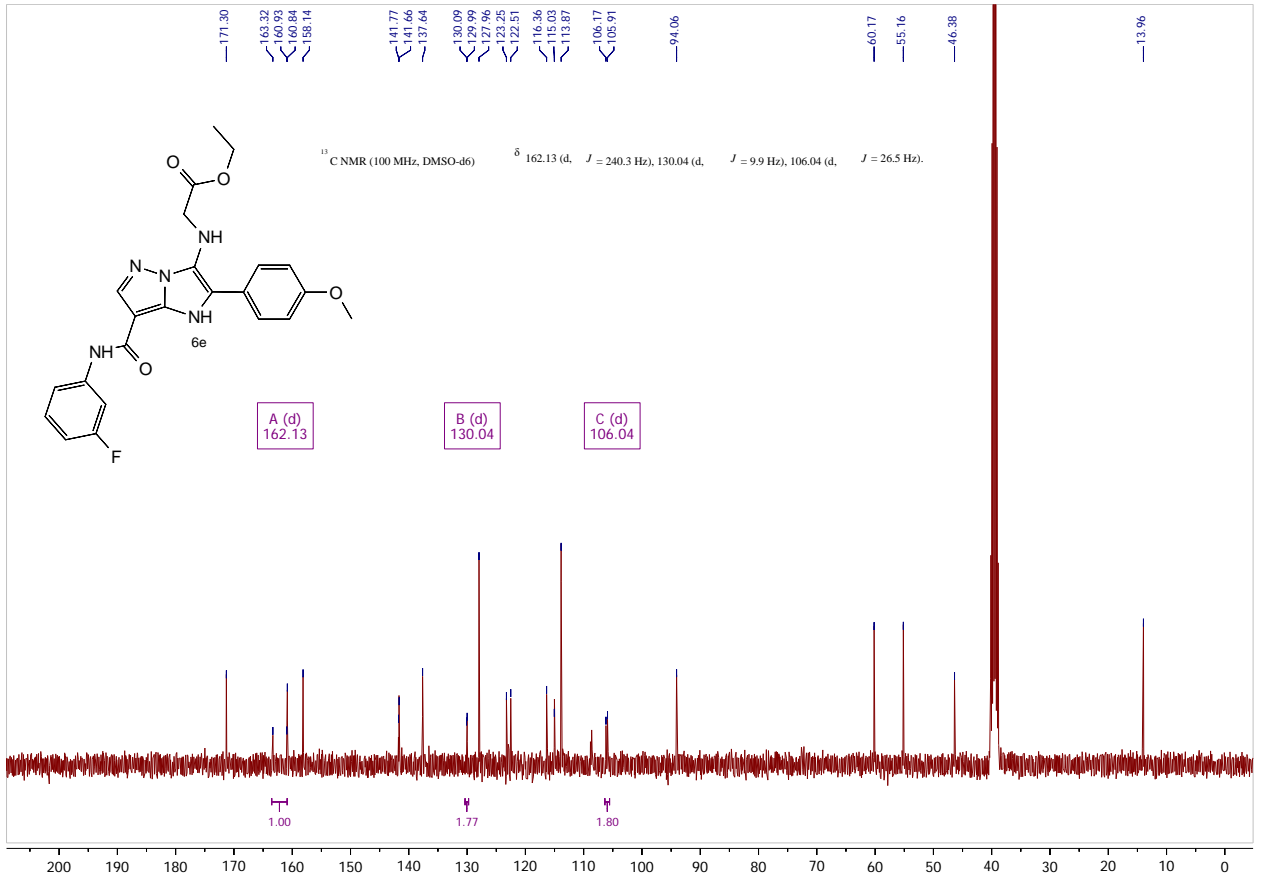

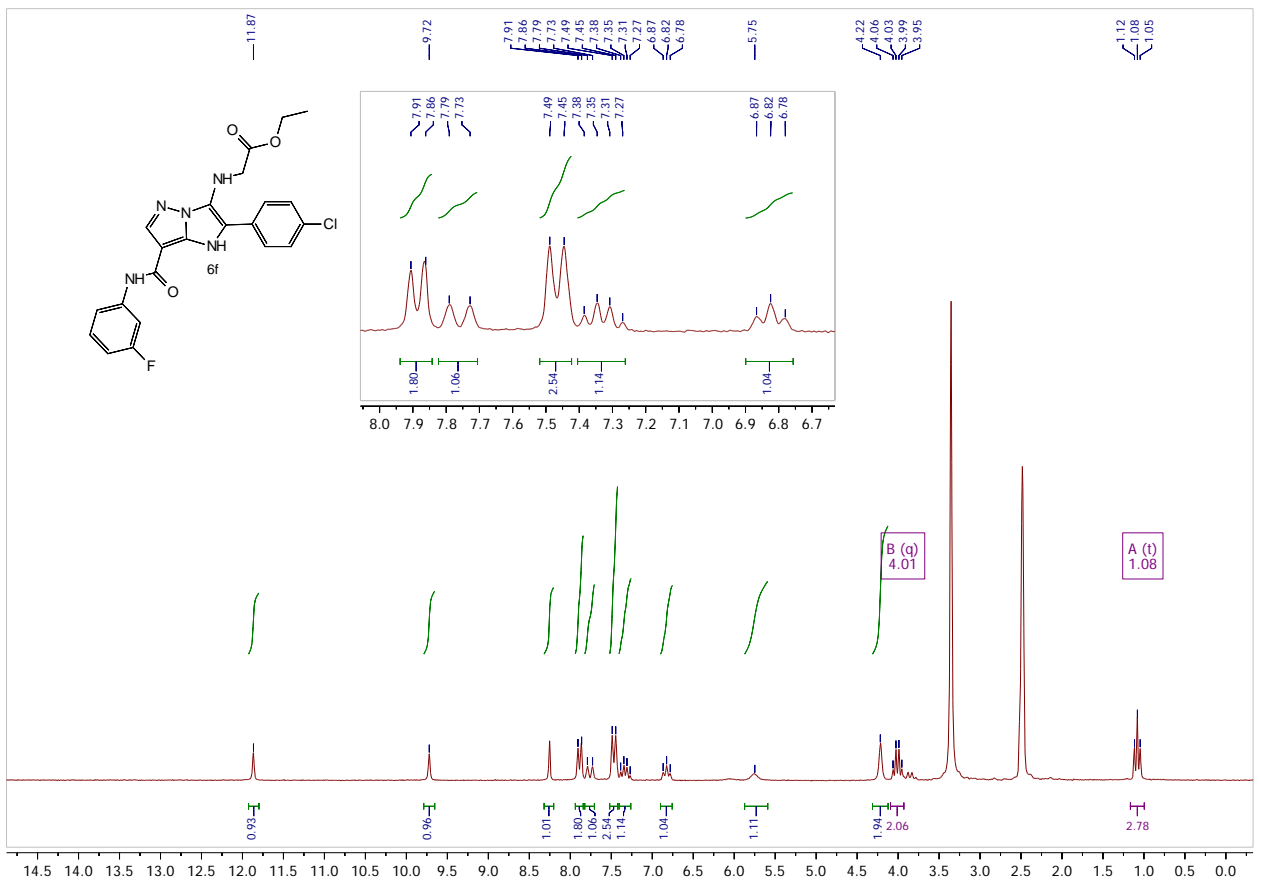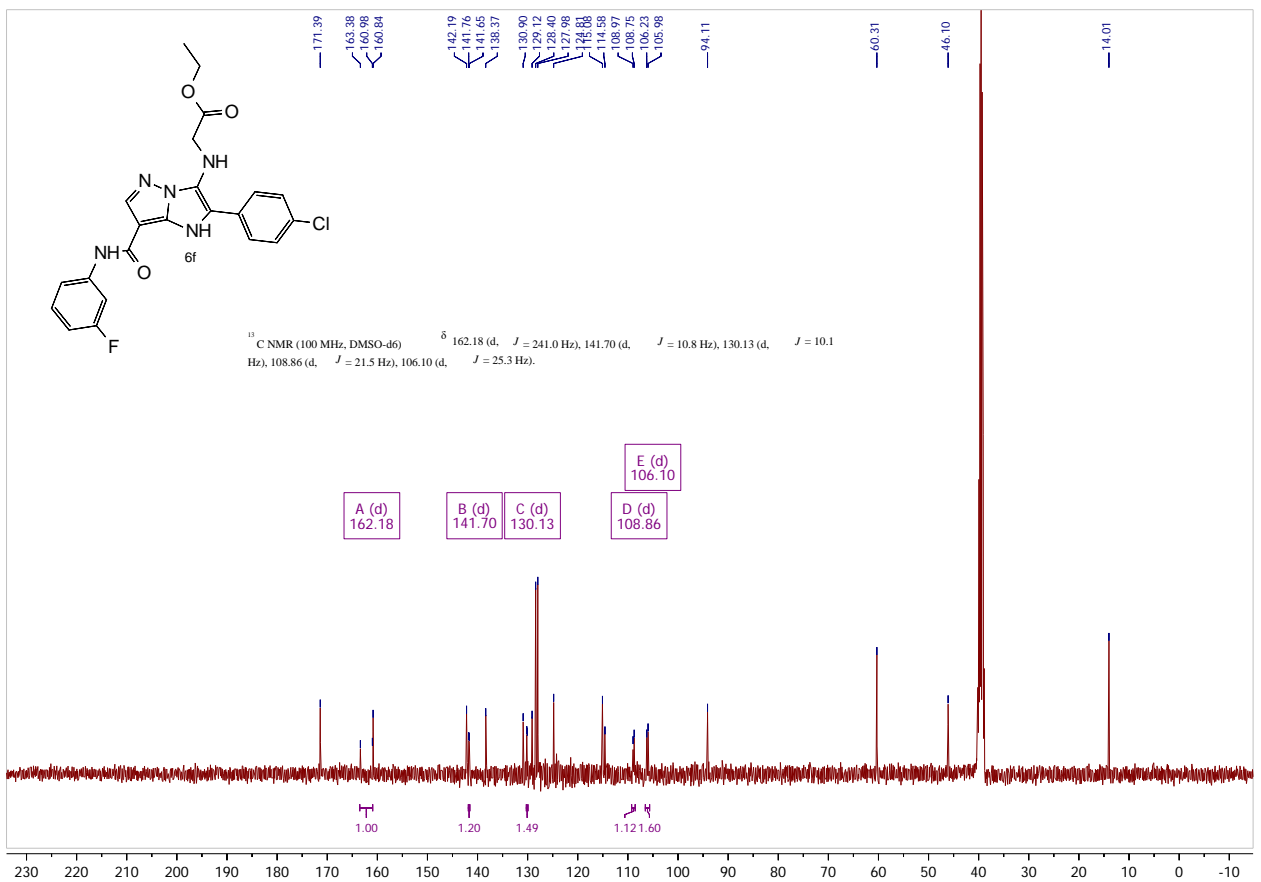

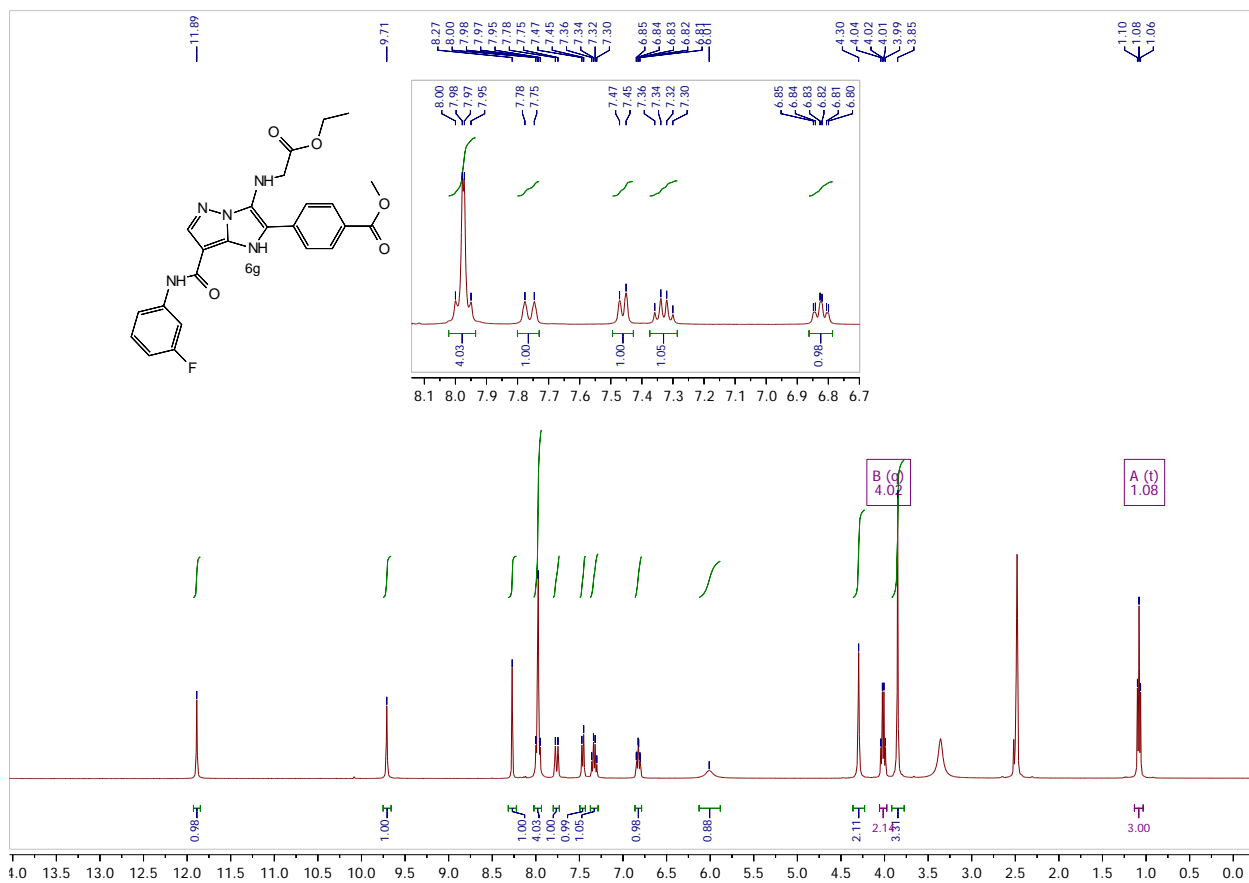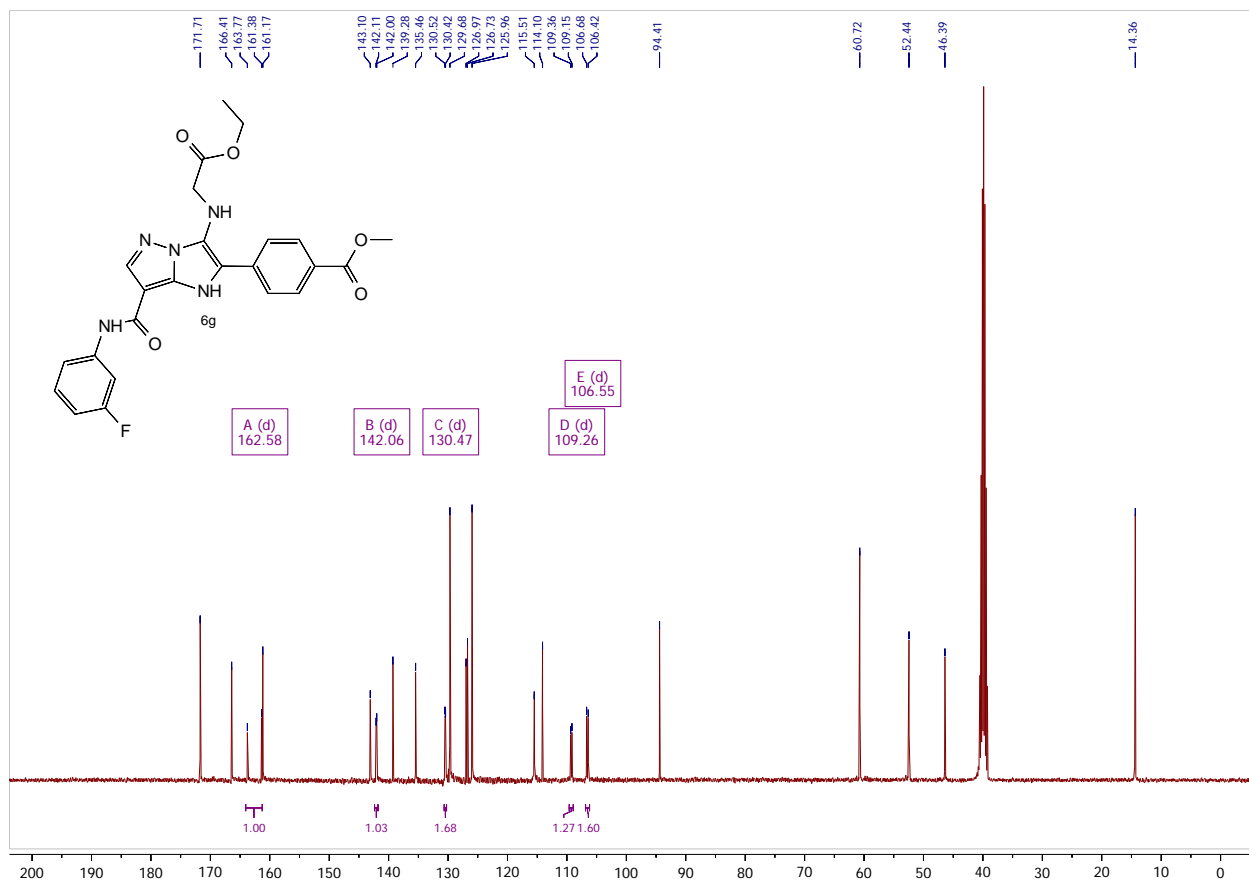



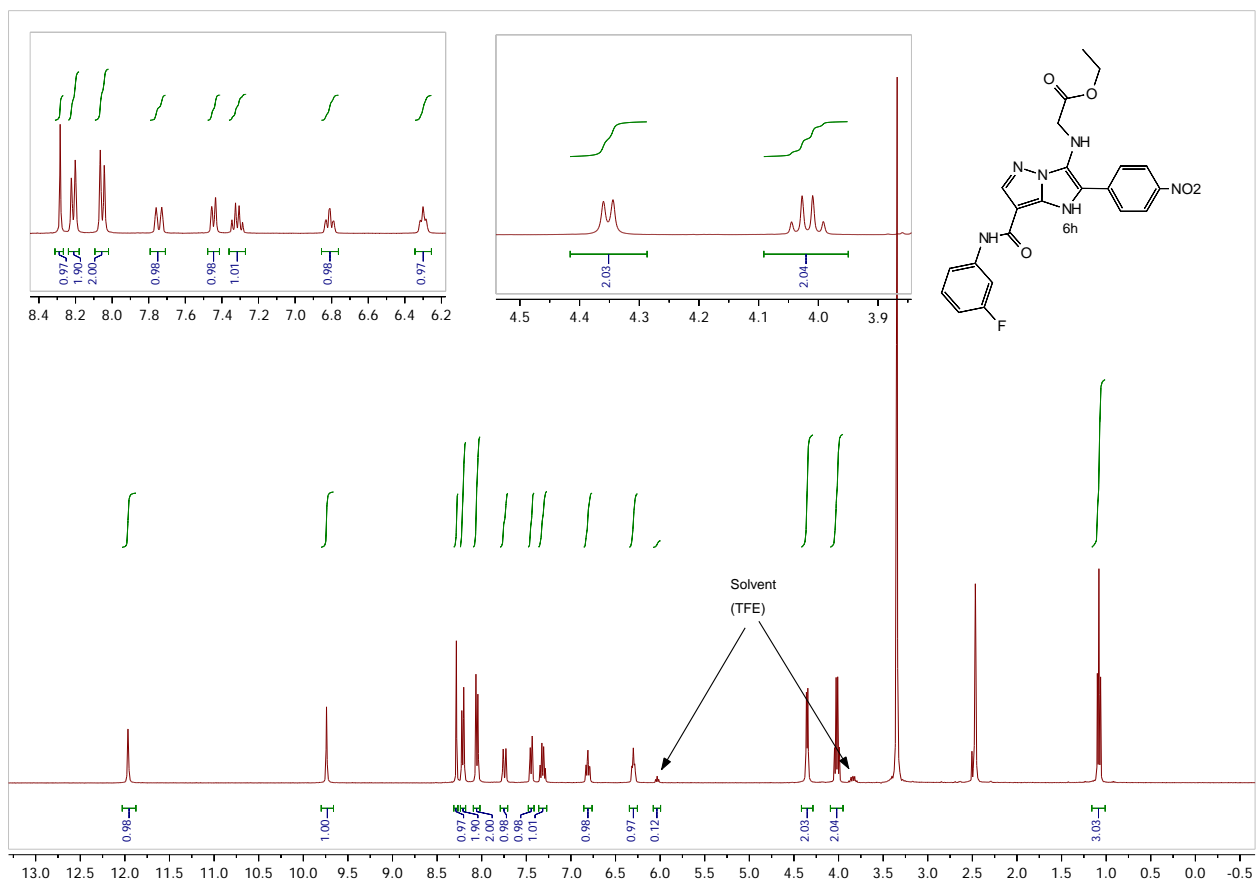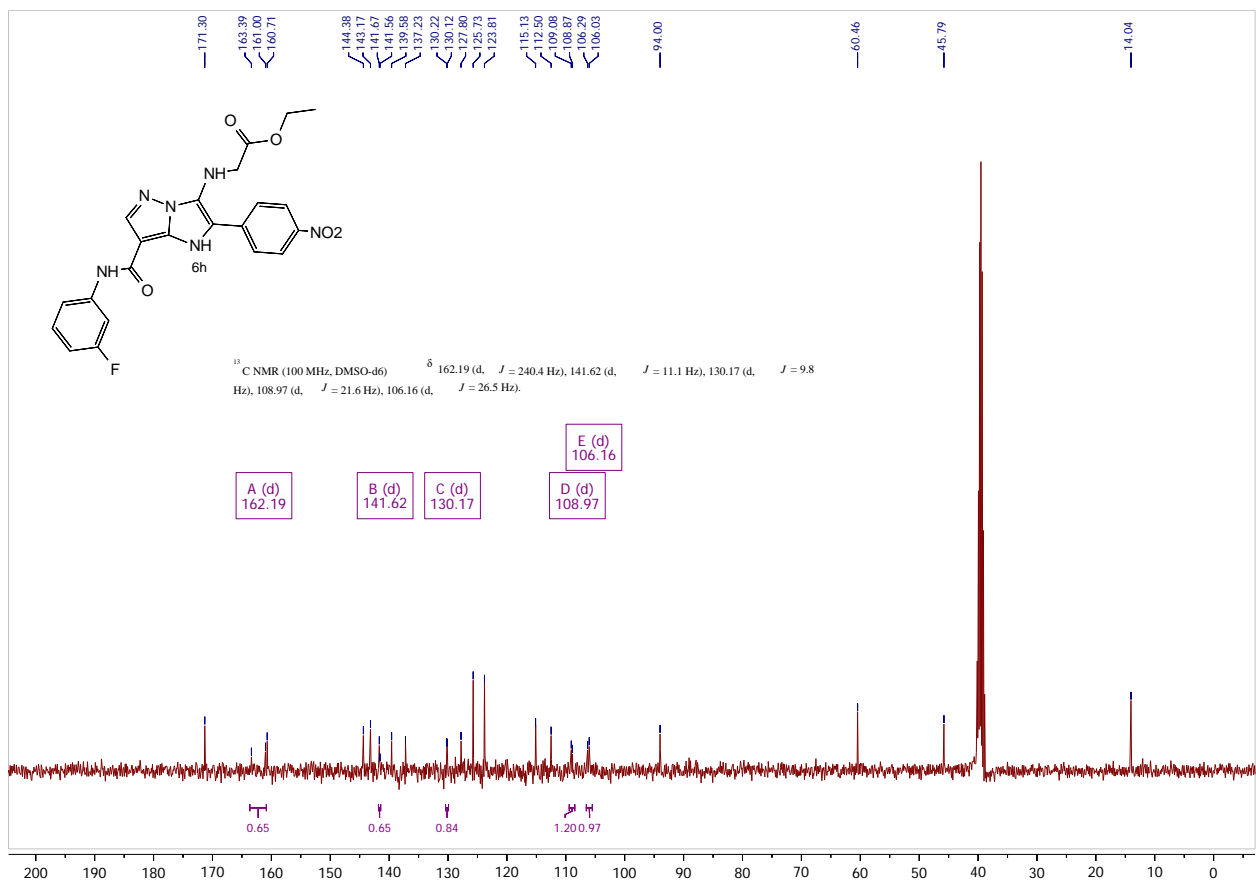

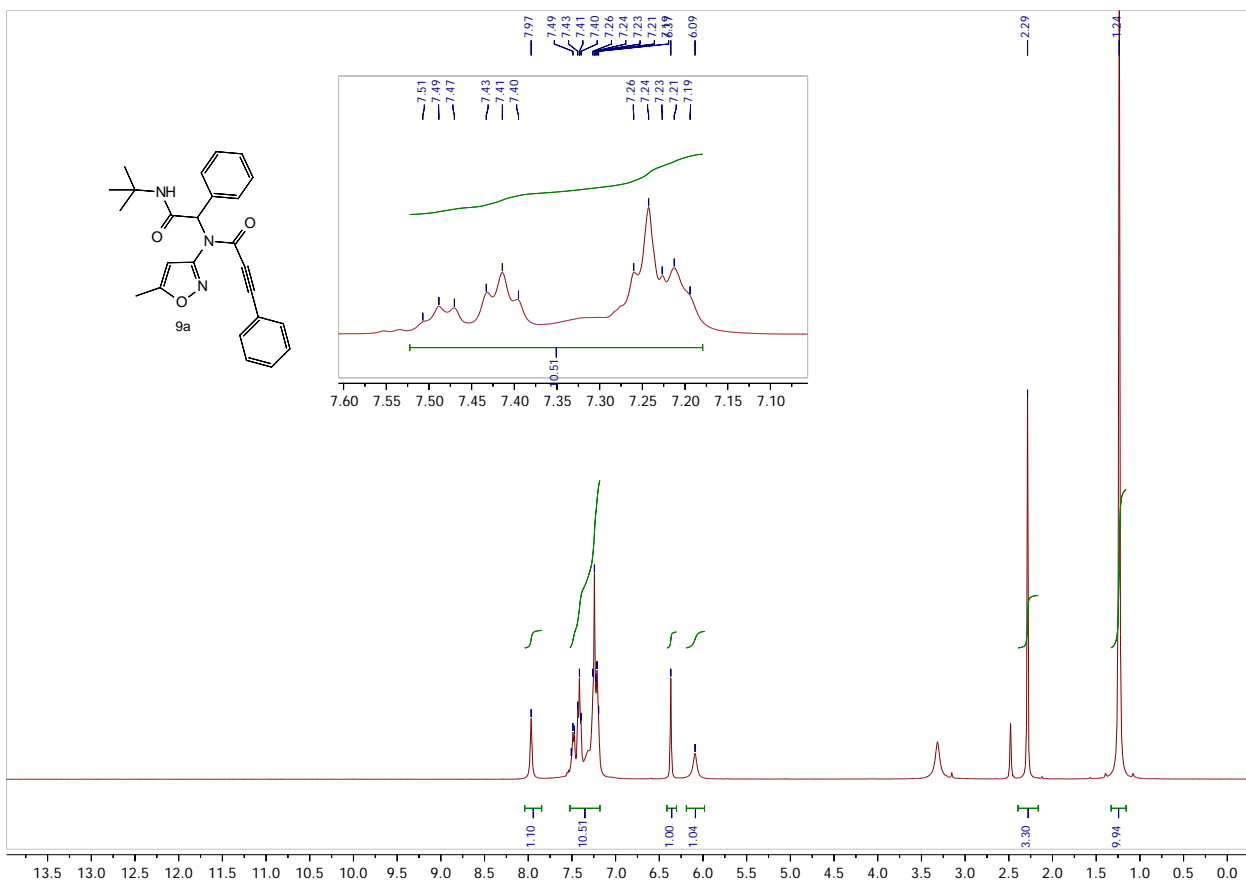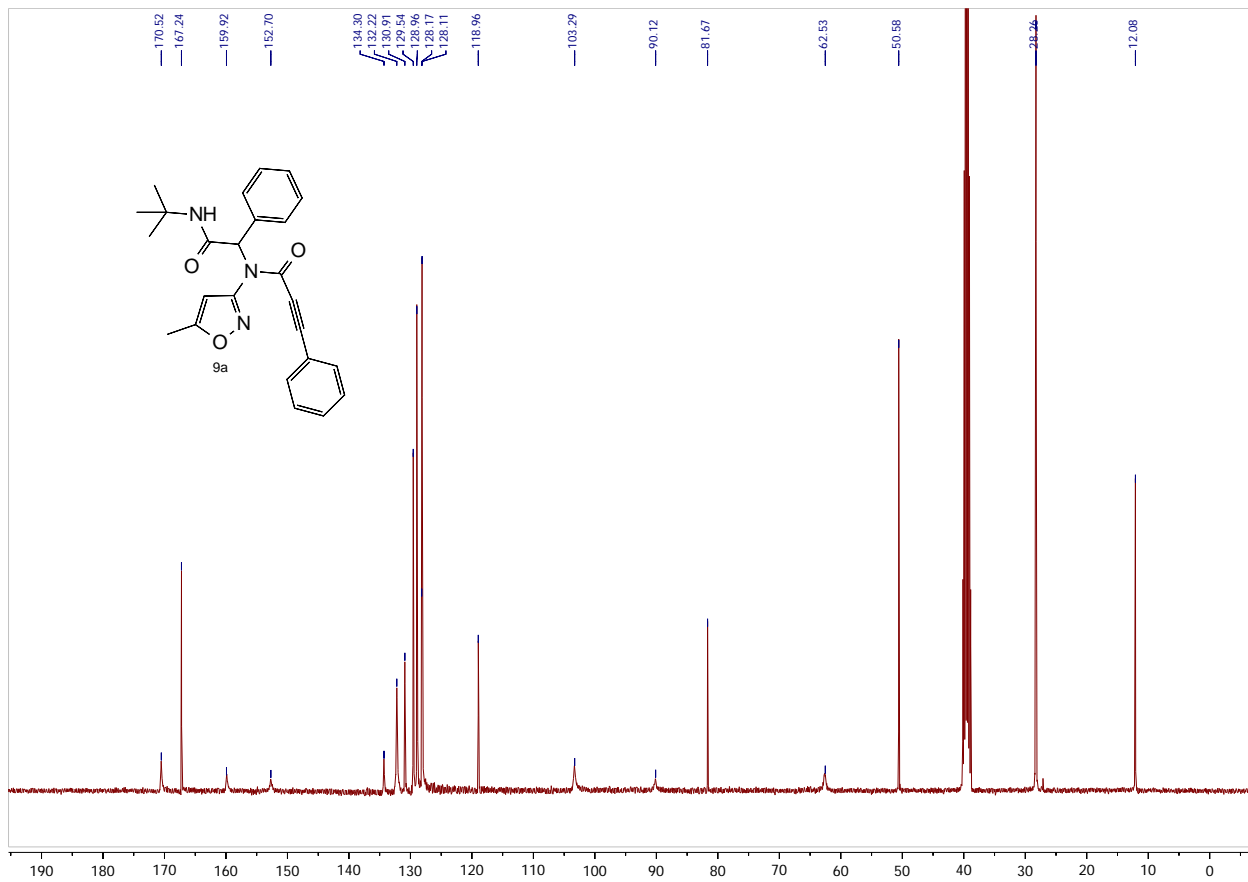

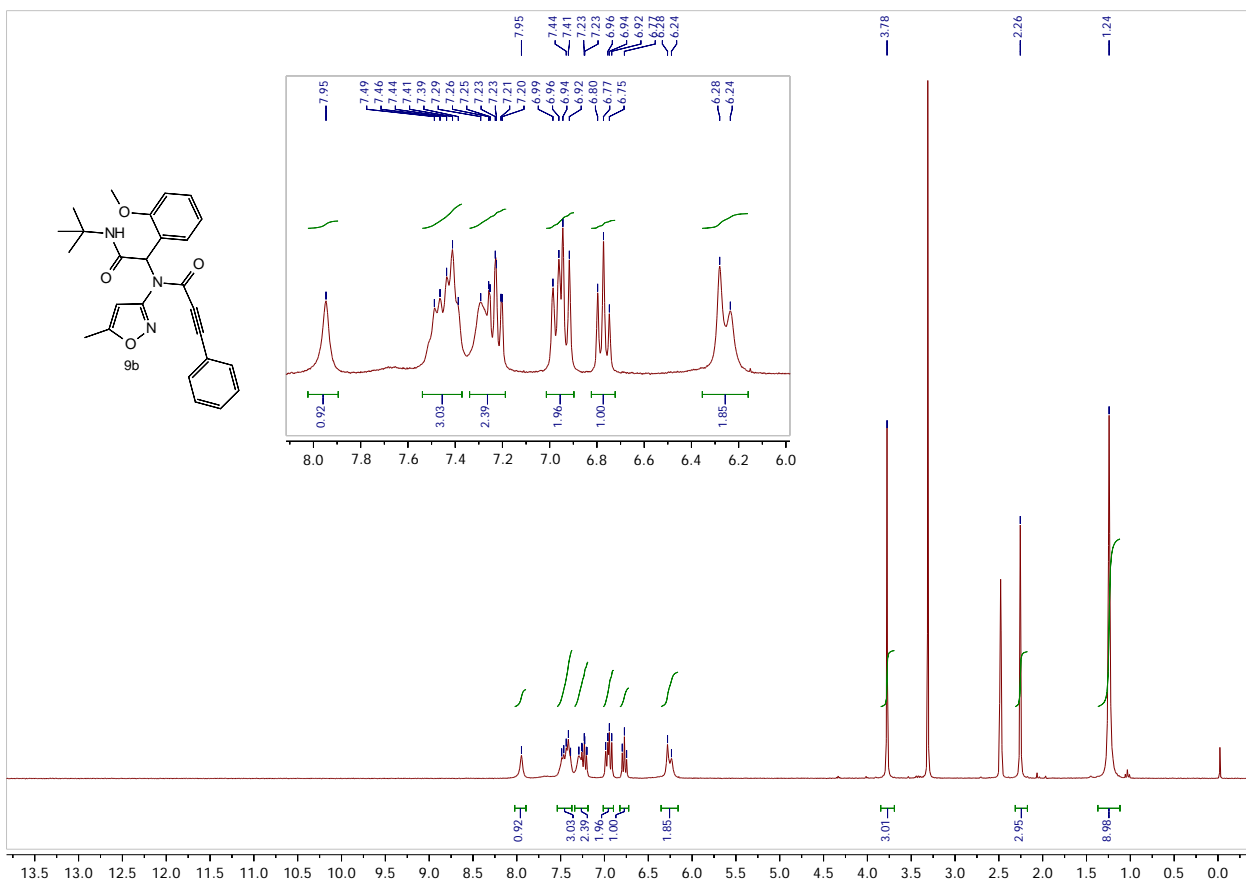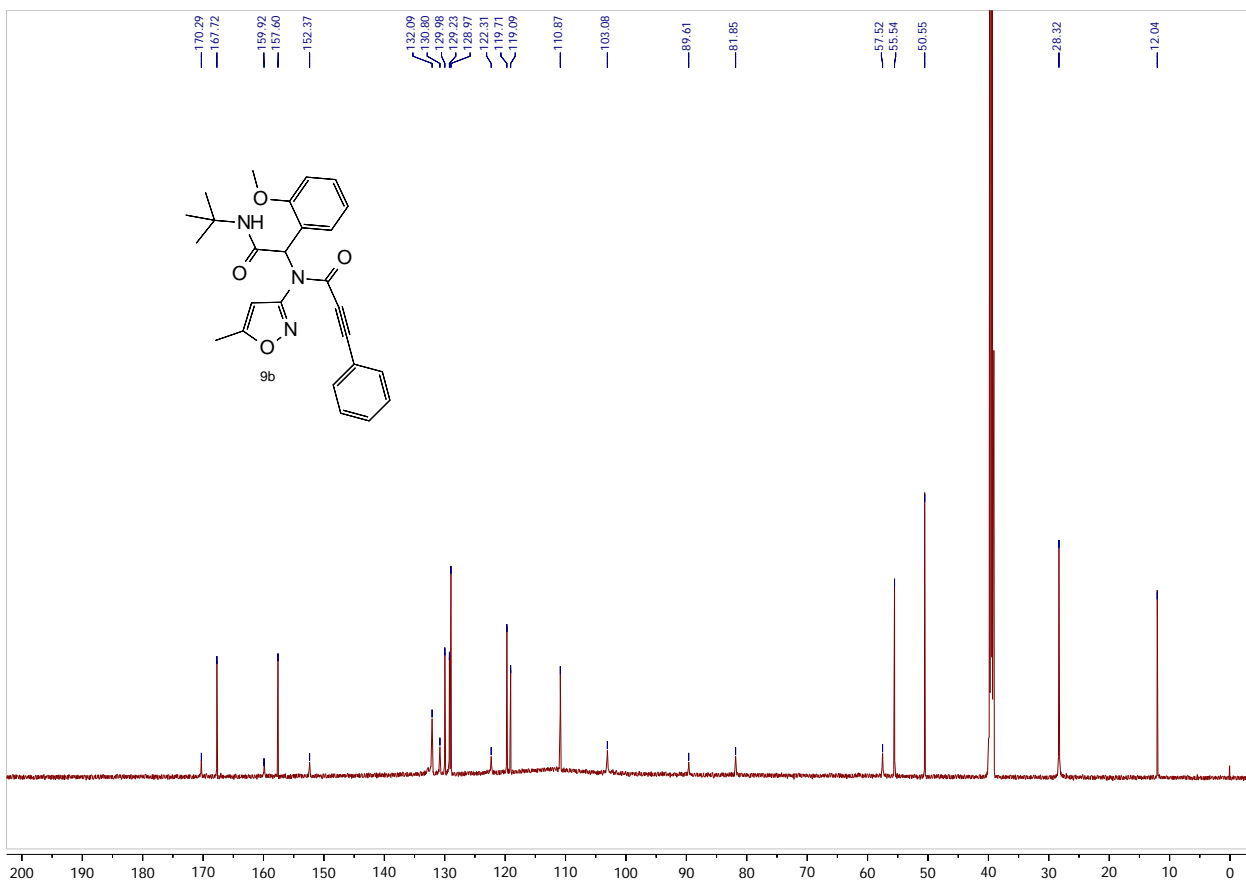

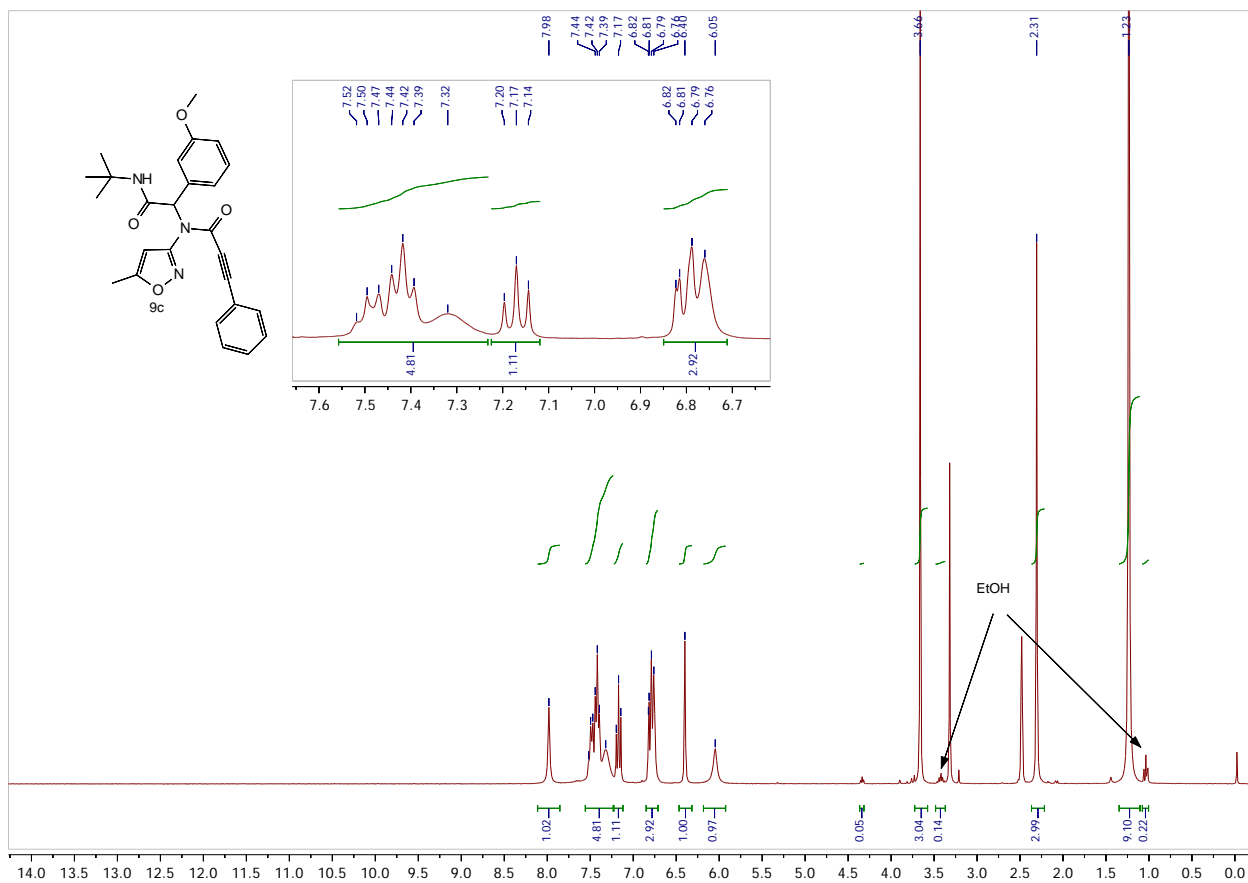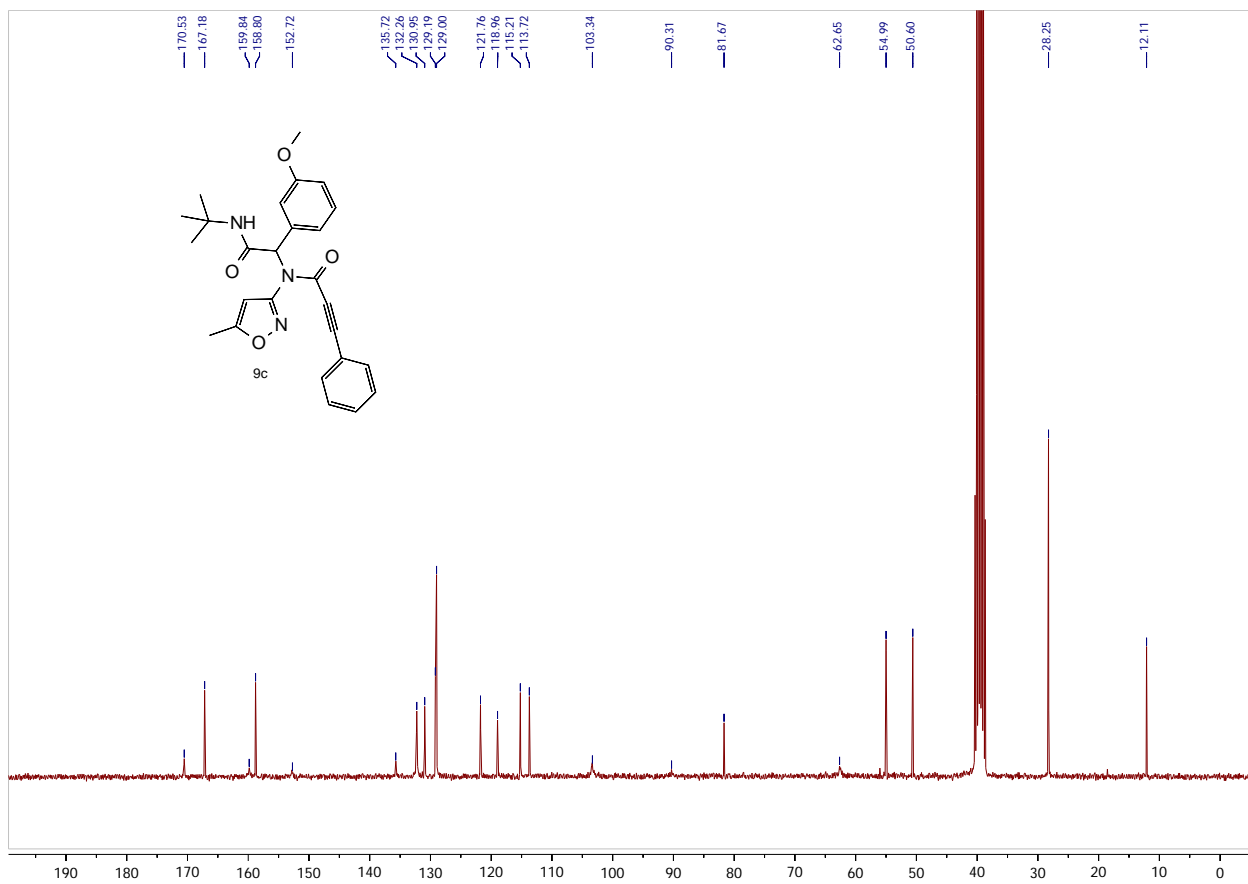



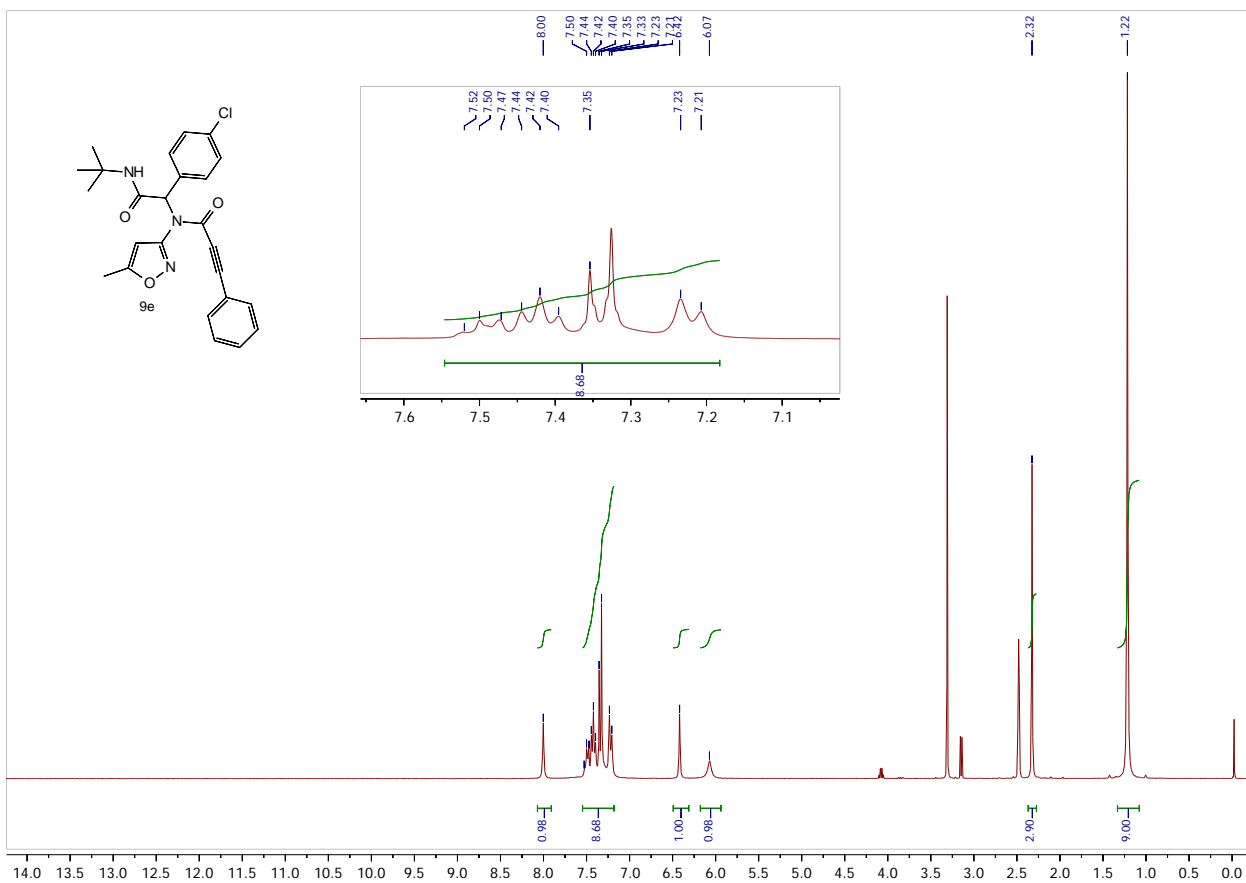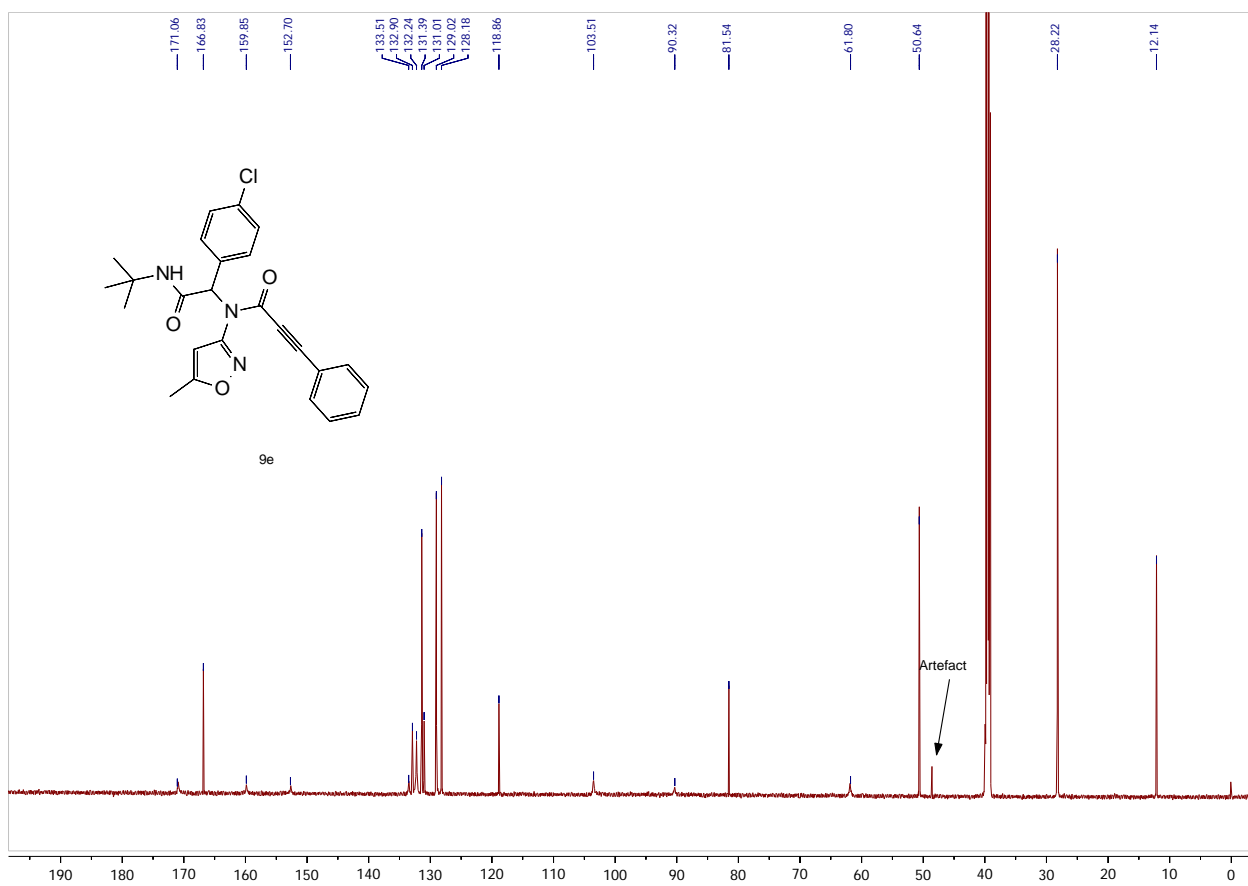

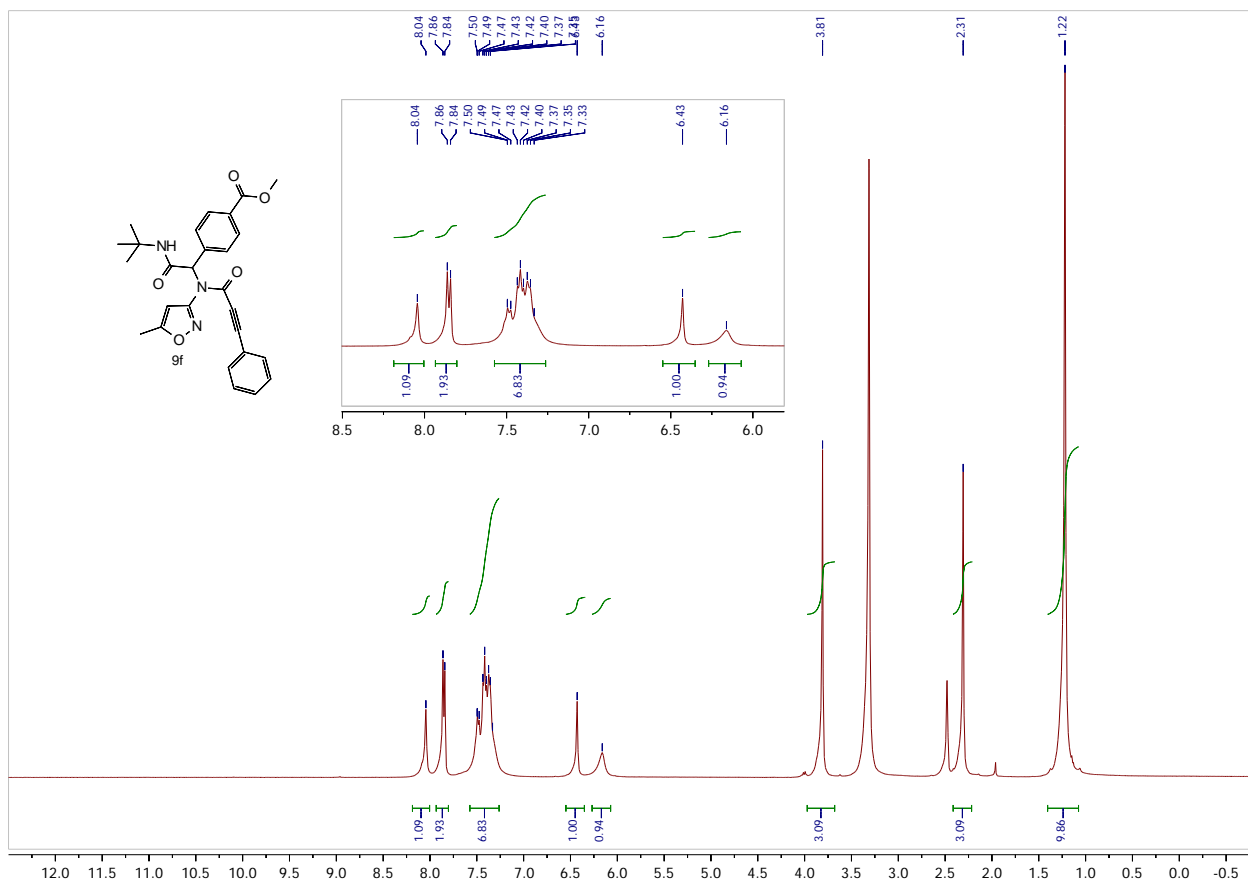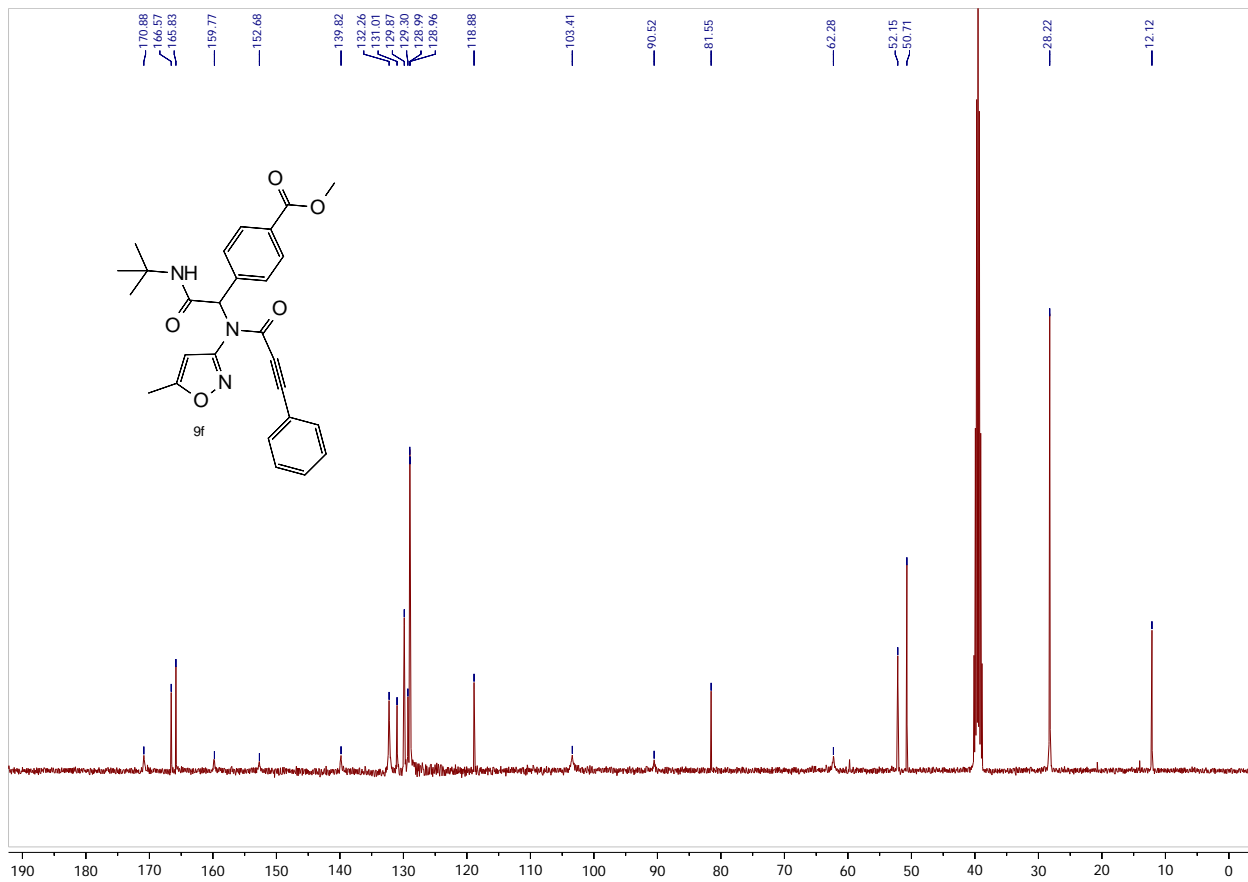

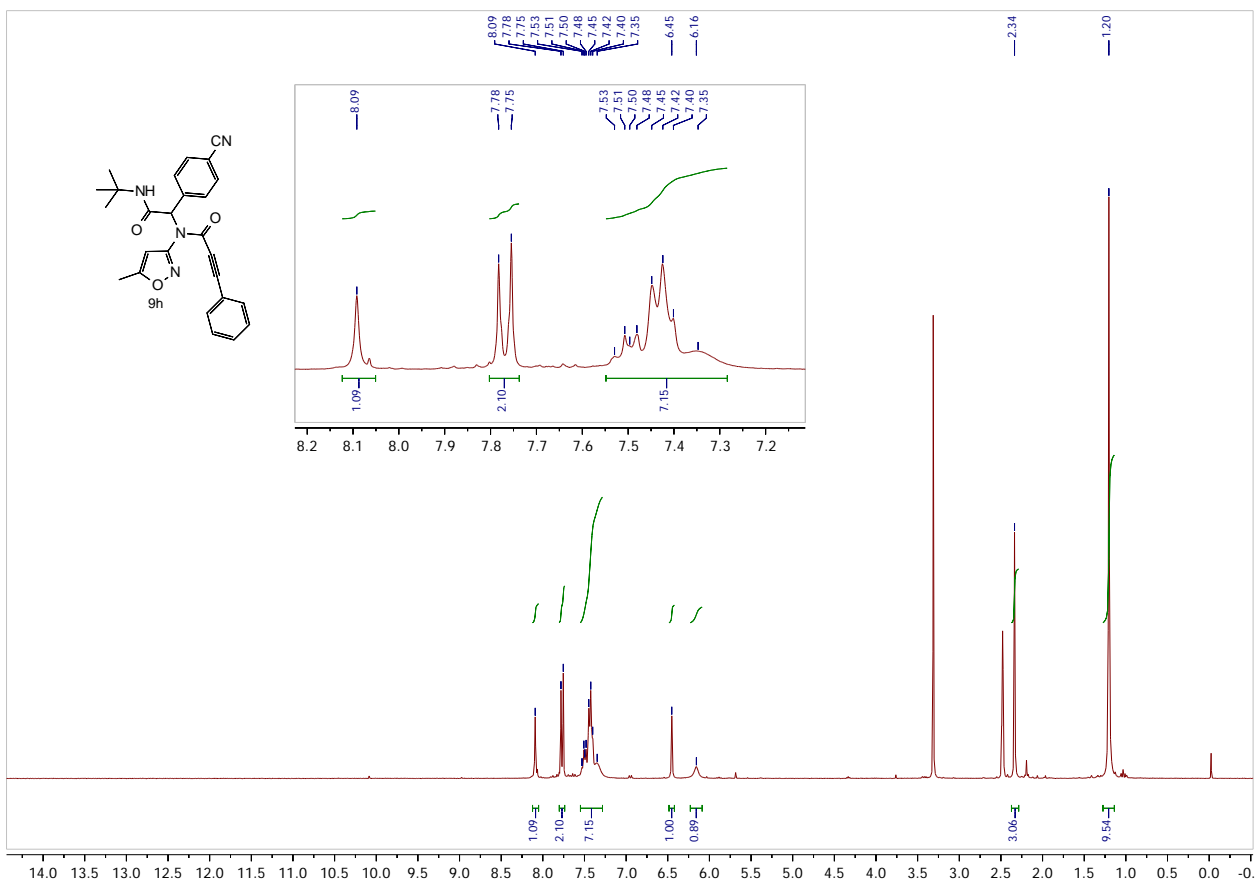

**NOESY spectrum for 4a**

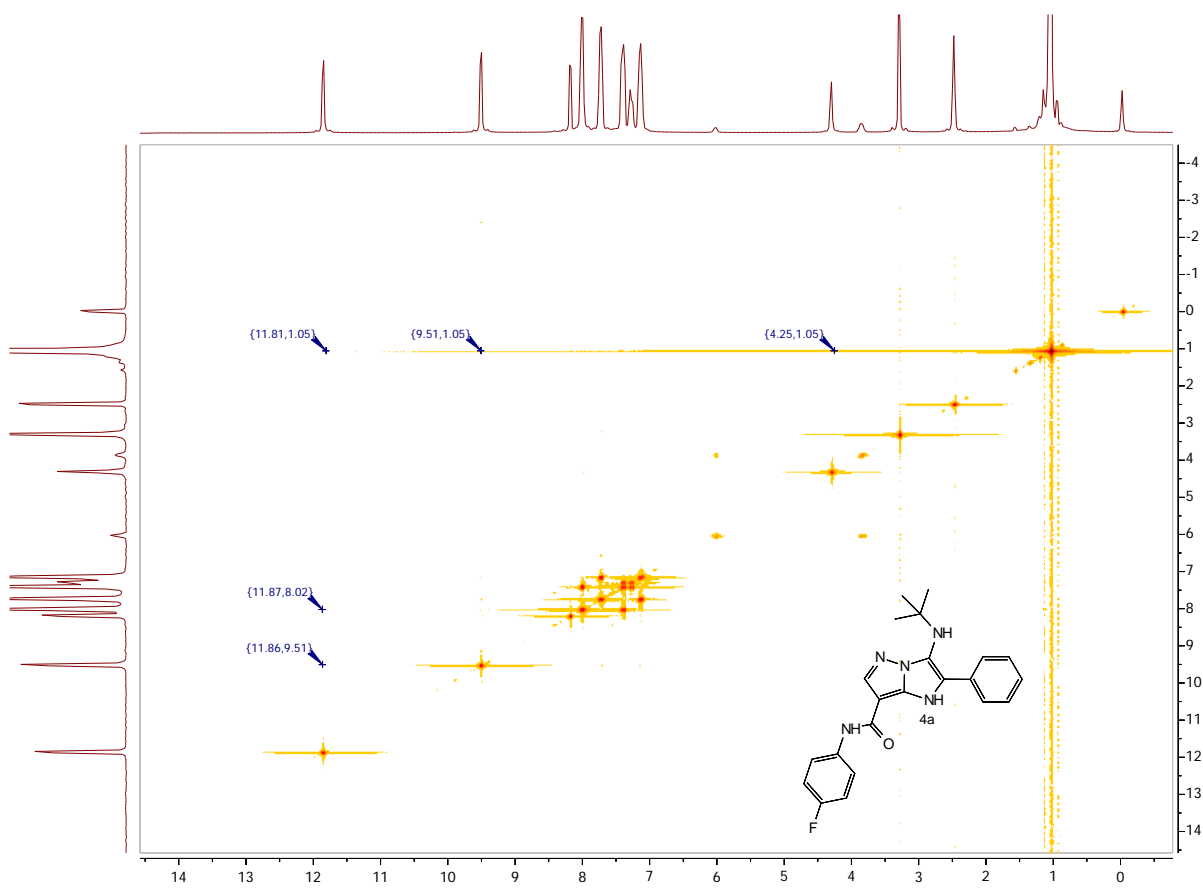



### HSQC spectrum for 4a

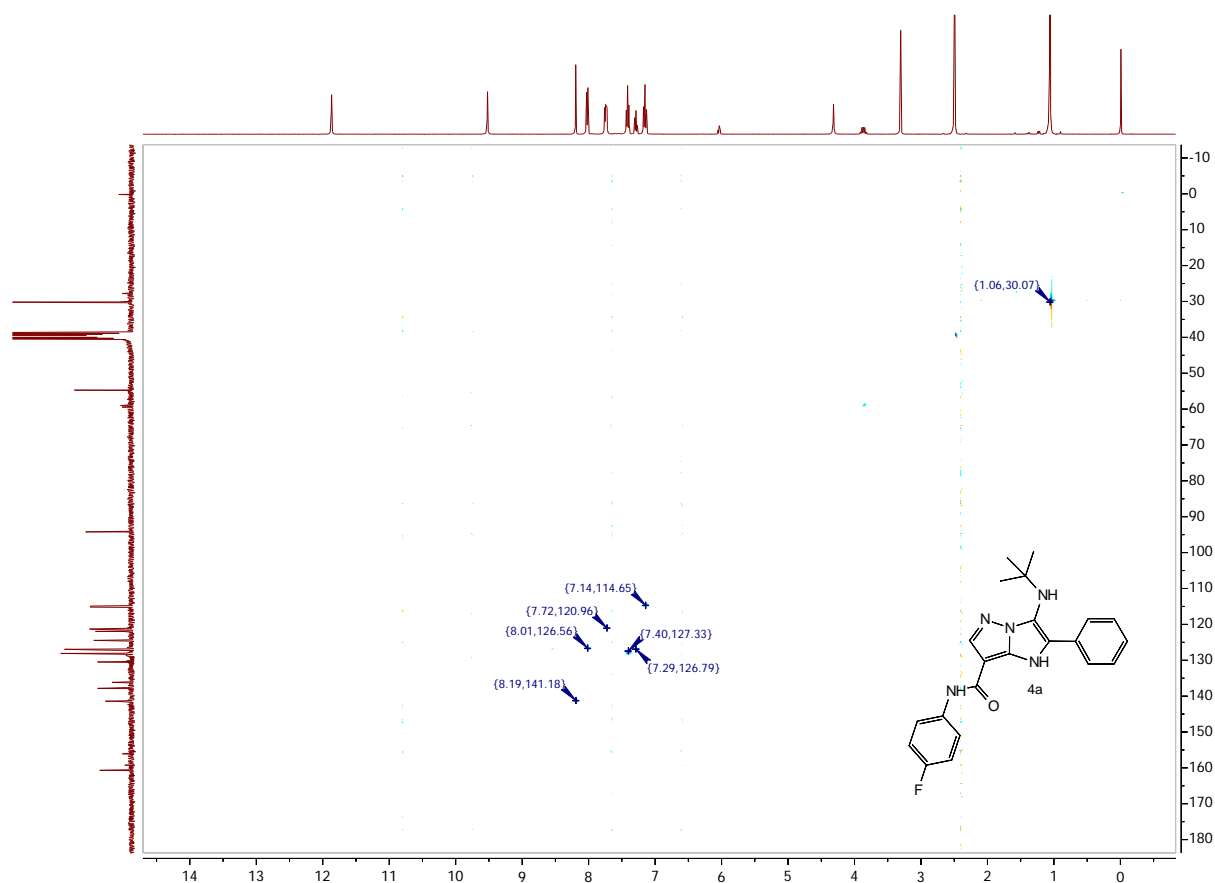

### HMBC spectrum for 4a

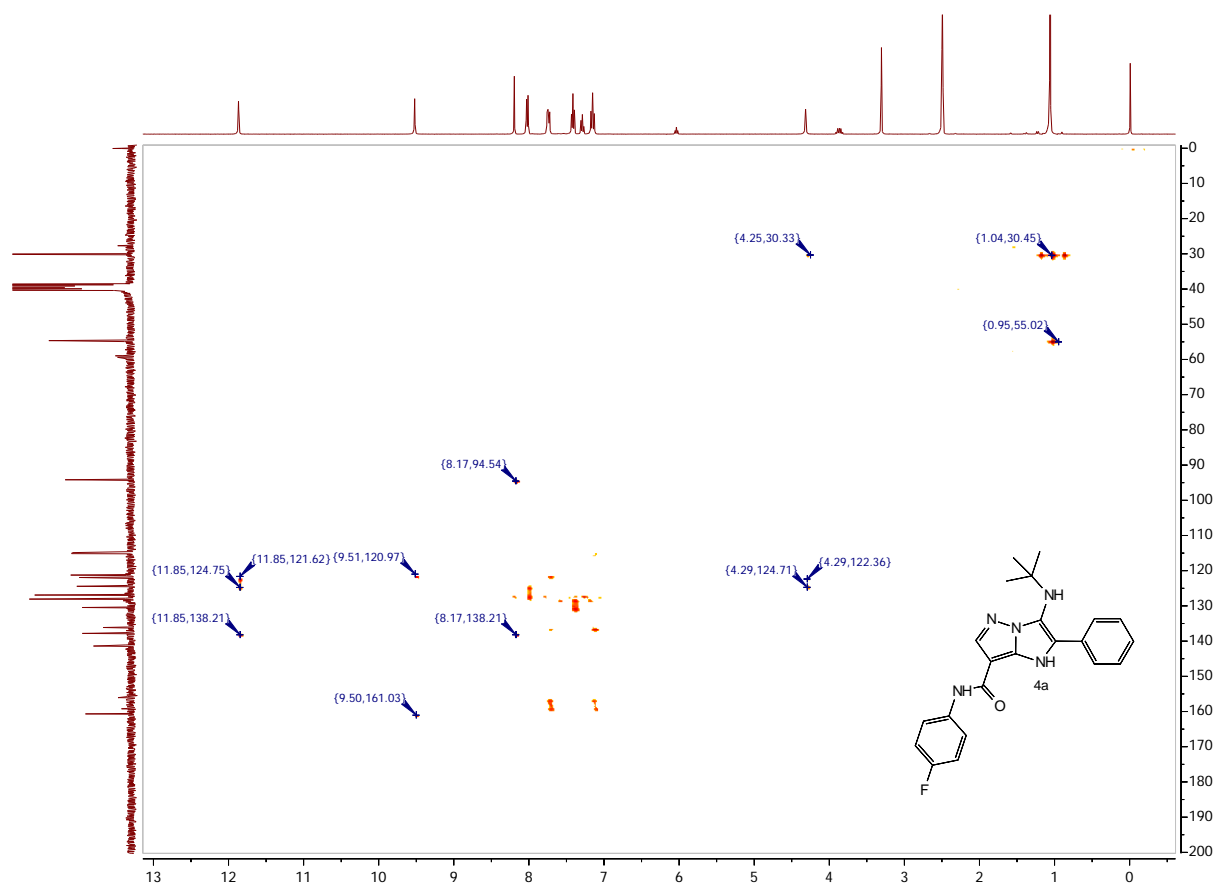

## HSQC spectrum for 9b

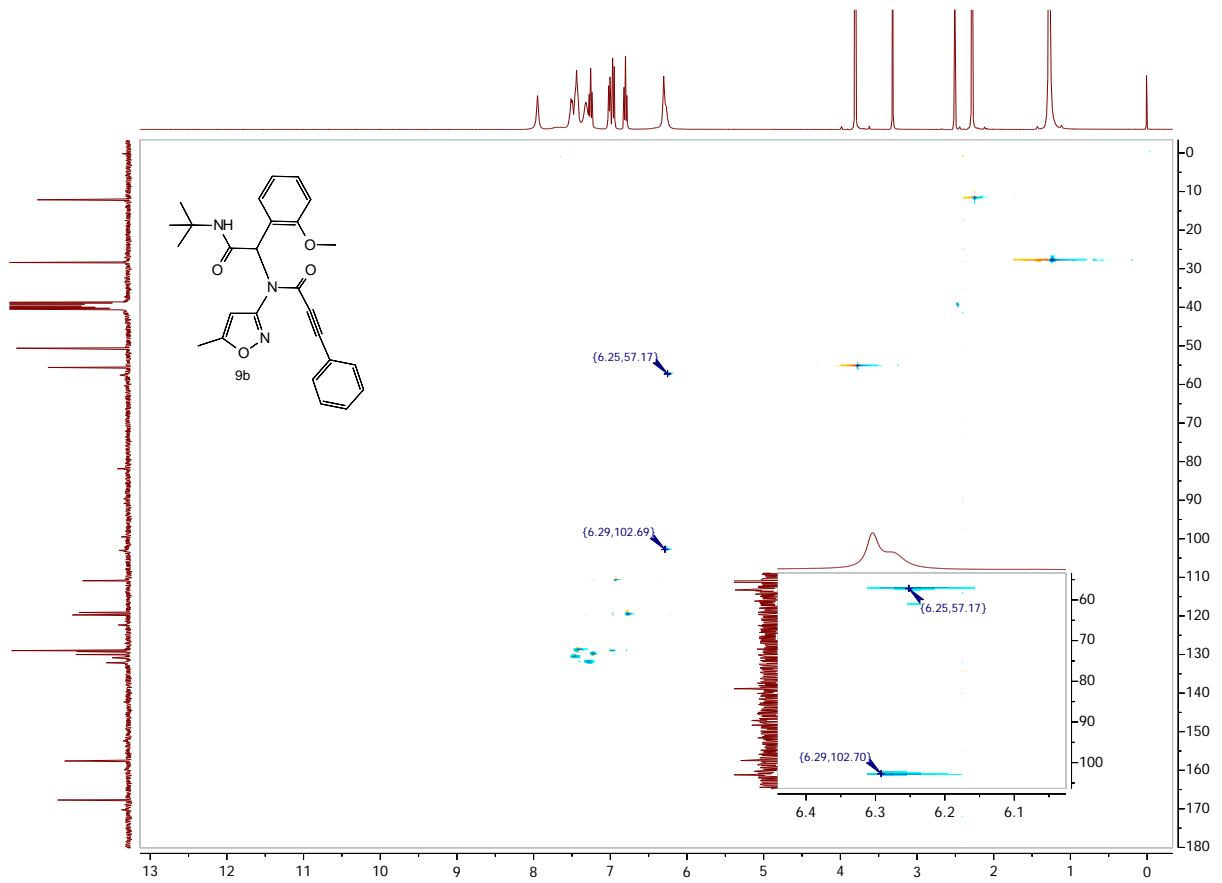

## HMBC spectrum for 9b

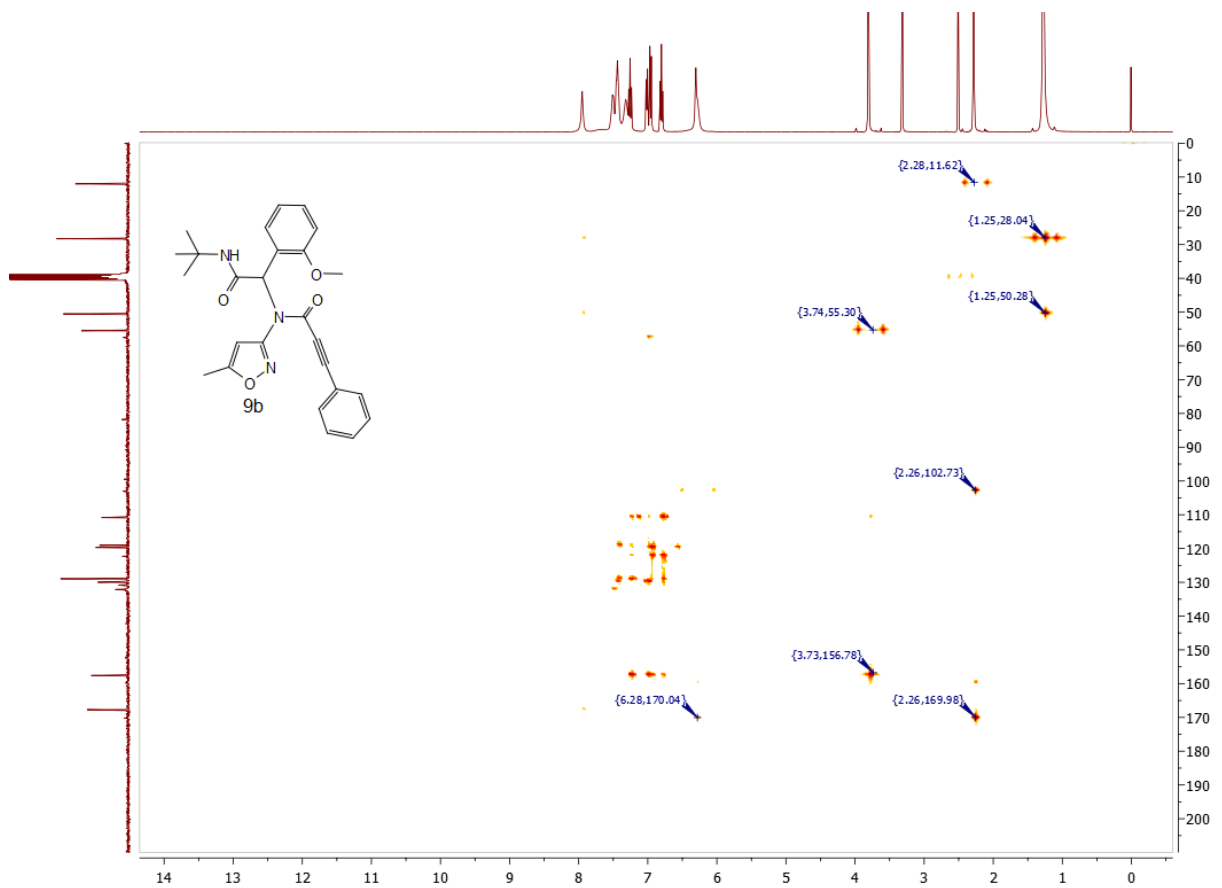

Supplement: Beilstein_J_Org_Chem-13-1050-s002.pdf [file Beilstein_J_Org_Chem-13-1050-s002.pdf]
